# Supplementary material for: Effects of sedative psychotropic drugs combined with oxycodone on respiratory depression in the rat
Source: PubMed Central journal article supplement — Clin Transl Sci. 2021 Jun 16;14(6):2208–19. doi: 10.1111/cts.13080 (PMC8604244; doi:10.1111/cts.13080), 2021-06-16

|                                                                                                                             | <b>Page(s)</b> |
|-----------------------------------------------------------------------------------------------------------------------------|----------------|
| <b>Contents of Contents</b>                                                                                                 | <b>1</b>       |
| Table S1. Drug groups and index drugs evaluated                                                                             | 2              |
| Selection of drugs for testing                                                                                              | 3              |
| Individual drug information used for decision making                                                                        | 4-21           |
| References for Drug Selection                                                                                               | 22-25          |
| Table S2. Dosing solutions or suspensions                                                                                   | 26             |
| Bioanalytical methods                                                                                                       | 27-32          |
| Table S3. Pharmacokinetic parameters of single dose, single drug administration                                             | 33             |
| Table S4: Single Drug $T_{max}$ and dose timing for combination experiments                                                 | 34             |
| Table S5: Pharmacokinetic parameters of the drugs upon coadministration                                                     | 35-36          |
| Figure S1: pCO <sub>2</sub> & pO <sub>2</sub> from individual SPD drug treatments and combination treatments with oxycodone | 37-64          |

**Table S1. Drug groups and index drugs evaluated**

| # in class | Drug Group                                         | Index Drugs     |                    |                 |
|------------|----------------------------------------------------|-----------------|--------------------|-----------------|
|            |                                                    | Drug 1          | Drug 2             | Drug 3          |
| 3          | Antihistamine                                      | Diphenhydramine |                    |                 |
| 9          | Atypical antipsychotic                             | Clozapine       | Quetiapine         | Risperidone     |
| 6          | Barbiturate                                        | Pentobarbital   |                    |                 |
| 9          | <i>Benzodiazepines</i>                             | <i>Diazepam</i> | {positive control} |                 |
| 2          | Gamma-amino butyric acid (GABA) analogue           | Gabapentin      |                    |                 |
| 3          | Imidazopyridine                                    | Zolpidem        |                    |                 |
| 3          | Mono Amine Oxidase Inhibitors (MAOI)               | Tranlycypromine |                    |                 |
| 2          | Serotonin antagonist and reuptake inhibitor (SARI) | Trazodone       |                    |                 |
| 4          | Skeletal muscle relaxant                           | Baclofen        | Carisoprodol       | Cyclobenzaprine |
| 5          | Selective serotonin reuptake inhibitor (SSRI)      | Paroxetine      |                    |                 |
| 9          | Tricyclic antidepressant                           | Amitriptyline   | Imipramine         |                 |
| 10         | Typical antipsychotic                              | Haloperidol     | Thioridazine       |                 |
|            |                                                    |                 |                    |                 |
| 9          | Ungrouped drugs                                    | Meprobamate     | Dextromethorphan   | Mirtazapine     |
|            |                                                    | Bupropion       | Duloxetine         | Venlafaxine     |
|            |                                                    | Topiramate      | Ramelteon          | Suvorexant      |

Gray shading indicates drugs that were excluded from nonclinical evaluation as described in the article because of existing literature regarding respiratory impact, lack of adverse event reports and/or very low prescription use. No highlighting indicates drugs selected for nonclinical evaluation.

## Selection of drugs for testing

For the purposes of evaluation, a wide net was cast for drugs that might be used in a psychiatric or neurological treatment regimen, that have a primary effect in the central nervous system (CNS), that might be used in place of a benzodiazepine and may have respiratory effects. Drug candidates were identified from a wide variety of sources including pharmaceutical classes utilized for benzodiazepine indications, specific pharmacological targets implicated in those indications (e.g., serotonergic, GABAergic, and histaminergic systems) and review of drugs with adverse events when co-administered with opioids. All drugs were being marketed in the US as of February 2017. After removal of duplicates, combination products and major anesthetics, there remained a total of 74 specific drugs, including the benzodiazepines. Where possible, the drugs were grouped by pharmaceutical class. These groupings were based on Established Pharmacological Classes, mechanism of action, known receptor binding, and structural similarity analyses. This approach resulted in 12 groups and 9 ungrouped drugs and a total of 27 drugs listed in Supplemental File 1. Following this initial grouping, representative (index) drugs were selected from each group for experimental investigation. Table 1 shows the selected index drugs. These index drugs were selected based on the known scientific information (number of peer-reviewed publications listed in Pubmed at the time of analysis), level of use (five-year outpatient prescription counts (QuintilesIMS, National Prescription Audit), number of adverse events (see sources below) and expert recommendations from FDA medical reviewers with subject matter expertise. For some drug classes, a single index drug was considered representative of the entire class, however in other classes, the experience and expertise of the FDA medical reviewers lead to inclusion of multiple drugs of interest or concern from the same class. Selection of an index drug was not predicated on and has no implication of the relative risk of the index drug compared to other drugs in the same group.

For each of the index drugs and for all the ungrouped drugs, more detailed information was collected from published nonclinical and clinical studies, product labeling, and drug usage data in February 2017. In addition, adverse event data were obtained from several sources: 1) Empirica Signal is a software program that aids in post-marketing safety surveillance by computing statistics on FDA Adverse Event Reporting System cases (Empirica Signal ver Feb 2017, Oracle, Austin, TX). Empirica Signal utilizes both Empirical Bayes Geometric Mean (EBGM) and the lower 90% confidence interval of this statistic, EB05, for safety signal detection. For this study, an EB05 score greater than 1.0 and EBGM greater than 2.0 was used to identify potential associations with respiratory depression in each the 74 drugs of interest. Additionally, combinations with the opioids morphine, fentanyl, sufentanil, tramadol, hydrocodone, hydromorphone, oxycodone, oxymorphone, and remifentanil were also evaluated. 2) the National Poison Data System (NPDS) is a database that contains all reports received by poison centers around the United States (Gummin et al, 2020). Report counts were obtained for fatal cases of at least one of the 74 drugs of interest in combination with one or more opioids from January 2000 – February 2017. For each drug of interest, individual report counts were divided by the total number of reports for all drugs in the dataset to obtain the percentage of reports. 3) the Toxicology Investigators Consortium (ToxIC) database is a voluntary registry containing reports of patients from medical toxicology practice sites around the country [Wax 2011]. Report counts were obtained for fatal cases of at least one of the 74 drugs of interest in combination with one or more opioids from 2010 – 2016. For each drug of interest, individual report counts were divided by the total number of reports for all drugs in the dataset to obtain the percentage of reports.

Information about the index drugs was evaluated to establish the strength of the integrated evidence for the effect on respiratory parameters including during co-administration with opioids. The drugs were placed into four groups, three of which were excluded from further consideration for prospective laboratory studies. An information summary that was the basis for these decisions for each of the selected drugs is located below.

Twelve of the identified index drugs were excluded from prospective laboratory studies because in the authors' opinion there was:

1. Sufficient existing evidence of respiratory effect: pentobarbital, gabapentin, amitriptyline and imipramine
2. Sufficient existing evidence of no respiratory effect: diphenhydramine, haloperidol, thioridazine, dextromethorphan and bupropion
3. Other miscellaneous reasons for exclusion: tranylcypramine (co-use unlikely due to serotonin syndrome, very low usage and no adverse event signal); meprobamate (very low usage and sufficient text in the FDA label); venlafaxine (very similar to another SNRI duloxetine)

#### Individual Drug Information Used for Decision Making

*Background information on selected index drugs including opinion or rationale for including or excluding for testing in the rat model.*

#### Antihistamine – Diphenhydramine

*Nonclinical:* In a nonclinical study in dogs and rats, IV Gamma-Aminobutyric Acid (GABA) caused an increased respiratory rate without modifying PO<sub>2</sub> or PCO<sub>2</sub>.

Treatment with diphenhydramine at 10 mg/kg (human equivalent dose (HED) 85 mg/kg rat, 5 mg/kg dog) did not alter the effect of GABA on respiratory parameters (Billingsley & Suria 1982).

*Clinical:* Diphenhydramine at a dose of 100 mg had no effect on respiratory depression in humans (Saarialho-Kere et al, 1989). Among 136 patients who attempted suicide with diphenhydramine, respiratory depression is listed as a 'less frequent' symptom (Koppel et al, 1987). No information was located on the effect of diphenhydramine in combination with an opioid.

#### Diphenhydramine

|            |                                                                                                                                                                                                                                                                                                                                                              |
|------------|--------------------------------------------------------------------------------------------------------------------------------------------------------------------------------------------------------------------------------------------------------------------------------------------------------------------------------------------------------------|
| Label Text | <p><b>Information for Patients:</b> Patients taking diphenhydramine hydrochloride should be advised that this drug may cause drowsiness and has an additive effect with alcohol.</p> <p><b>Drug Interactions</b> Diphenhydramine hydrochloride has additive effects with alcohol and other CNS depressants (hypnotics, sedatives, tranquilizers, etc.).”</p> |
| Clinical   | 50 mg IV (0.8 mg/kg)                                                                                                                                                                                                                                                                                                                                         |

|         |                                                                                                                                                                                      |
|---------|--------------------------------------------------------------------------------------------------------------------------------------------------------------------------------------|
| Dose    |                                                                                                                                                                                      |
| AE Data | FAERS: Diphenhydramine alone (EBGM: 3.6; EB05: 2.8) and in combination with opioids: EBGM: 2.3 – 8.1; EB05: 1.6 – 5.7<br>NPDS: Diphenhydramine represented 1.1% of our pulled cases. |
| Opinion | Massive OTC use; No Action Indicated (NAI), sufficient evidence of no effect on respiratory parameters.                                                                              |

**Atypical antipsychotic – Clozapine** No direct data on respiratory depression in nonclinical or clinical studies. No information located on effect in combination with an opioid.

Clozapine

|                    |                                                                                                                                                                          |
|--------------------|--------------------------------------------------------------------------------------------------------------------------------------------------------------------------|
| Label Text         | No relevant text identified                                                                                                                                              |
| Clinical Dose      | 400 mg (6.7 mg/kg)                                                                                                                                                       |
| Prescription Count | 9.1 million                                                                                                                                                              |
| AE Data            | FAERS: Clozapine alone (EBGM: 2.1; EB05: 1.8) and in combination with opioids: EBGM: 3.9 – 4.8; EB05: 2.5 – 3.2<br>NPDS: Clozapine represented 0.1% of our pulled cases. |
| Opinion            | Candidate for rat studies                                                                                                                                                |

**Risperidone:** No direct data on respiratory depression in nonclinical or clinical studies. No information located on effect in combination with an opioid.

Risperidone

|                    |                                                                                                                                                                                                                                                            |
|--------------------|------------------------------------------------------------------------------------------------------------------------------------------------------------------------------------------------------------------------------------------------------------|
| Label Text         | <b>7.2 Pharmacodynamic-related Interactions</b><br><b>Centrally-Acting Drugs and Alcohol</b><br>Given the primary CNS effects of risperidone, caution should be used when RISPERDAL is taken in combination with other centrally-acting drugs and alcohol. |
| Clinical Dose      | 5 mg (0.08 mg/kg)                                                                                                                                                                                                                                          |
| Prescription Count | 62.8 million                                                                                                                                                                                                                                               |
| AE Data            | FAERS: Risperidone in combination with tramadol: EBGM: 2.8; EB05: 1.8<br>NPDS: Risperidone represented 0.8% of our pulled cases                                                                                                                            |
| Opinion            | Candidate for rat studies                                                                                                                                                                                                                                  |

**Quetiapine:** No clear data on respiratory depression in nonclinical or clinical studies. No information located on effect in combination with an opioid. There is limited evidence of respiratory depression with both atypical antipsychotic drugs in overdose/abuse patients (Ciranni et al, 2009).

Quetiapine

|            |                                                                                                        |
|------------|--------------------------------------------------------------------------------------------------------|
| Label Text | “7 DRUG INTERACTIONS: ... Given the primary CNS effects of SEROQUEL, caution should be used when it is |
|------------|--------------------------------------------------------------------------------------------------------|

|                    |                                                                                                        |
|--------------------|--------------------------------------------------------------------------------------------------------|
|                    | taken in combination with other centrally acting drugs.”                                               |
| Clinical Dose      | 50 mg TID (0.8 mg/kg each)                                                                             |
| Prescription Count | 93.0 million                                                                                           |
| AE Data            | FAERS: Quetiapine alone: EBGM: 2.6; EB05: 2.2<br>NPDS: Quetiapine represented 1.0% of our pulled cases |
| Opinion            | Candidate for rat studies                                                                              |

### Barbiturate – Pentobarbital

*Nonclinical:* Evidence of respiratory depression in rats at 40 mg/kg (HED 5.7 mg/kg) (Field et al, 1993) and in humans (30 mg) (Gasser et al, 1975) is sufficient. Direct evaluations of the combination of pentobarbital with an opioid have not been identified.

*Clinical:* An indirect measure is that pentobarbital was used for sedation in children with fentanyl being the second line drug commonly used with pentobarbital if a stronger effect was needed (Egelhoff et al, 1997). Mild respiratory depression was noted in 0.79% of the 6006 patients in this series and was most commonly associated with enlarged adenoids or with a mild upper respiratory tract infection.

#### Pentobarbital

|                    |                                                                                                                                                                                                                                                                                                                                                                                                                                                                                                                                                                                                                                                                                                                                                                                              |
|--------------------|----------------------------------------------------------------------------------------------------------------------------------------------------------------------------------------------------------------------------------------------------------------------------------------------------------------------------------------------------------------------------------------------------------------------------------------------------------------------------------------------------------------------------------------------------------------------------------------------------------------------------------------------------------------------------------------------------------------------------------------------------------------------------------------------|
| Label Text         | <p>“<u>WARNINGS:</u> . . .</p> <p>5. Synergistic effects: The concomitant use of alcohol or other CNS depressants may produce additive CNS depressant effects.</p> <p><u>PRECAUTIONS:</u> . . .</p> <p>3. Alcohol should not be consumed while taking barbiturates. Concurrent use of the barbiturates with other CNS depressants (e.g., alcohol, narcotics, tranquilizers, and antihistamines) may result in additional CNS depressant effects.</p> <p><u>CLINICAL PHARMACOLOGY:</u> . . . Barbiturates are respiratory depressants. The degree of respiratory depression is dependent upon dose. With hypnotic doses, respiratory depression produced by barbiturates is similar to that which occurs during physiologic sleep with slight decrease in blood pressure and heart rate.”</p> |
| Clinical Dose      | 150 mg IM (2.5 mg/kg)                                                                                                                                                                                                                                                                                                                                                                                                                                                                                                                                                                                                                                                                                                                                                                        |
| Prescription Count | 835 prescriptions, 13.9 million for phenobarbital (now off market), the rest of the marketed barbiturates have prescription counts in the hundreds to low thousands.                                                                                                                                                                                                                                                                                                                                                                                                                                                                                                                                                                                                                         |
| AE Data            | FAERS: Pentobarbital alone: EBGM: 6.5; EB05: 3.1                                                                                                                                                                                                                                                                                                                                                                                                                                                                                                                                                                                                                                                                                                                                             |
| Opinion            | Existing clinical and nonclinical data sufficient for direct effects. NAI due to low usage.                                                                                                                                                                                                                                                                                                                                                                                                                                                                                                                                                                                                                                                                                                  |

## Benzodiazepine – Diazepam

*Nonclinical:* In the rat, diazepam has no effect on PO<sub>2</sub> or on PCO<sub>2</sub> at a dose of 20 mg/kg sc (HED 2.9 mg/kg). Treatment with methadone at 5 mg/kg IP causes significant respiratory depression (+7 mm Hg PCO<sub>2</sub>) and the combination of diazepam and methadone causes significantly greater respiratory depression than methadone alone (+15 mm Hg PCO<sub>2</sub>). An effect on PO<sub>2</sub> was also observed but was of lesser magnitude (McCormick et al, 1984). Similar findings have been reported in rats treated with midazolam, buprenorphine and their combination (Gueye et al, 2002). A more complex picture is seen in a study evaluating several benzodiazepines alone or with buprenorphine. Oxazepam, nordiazepam and bromazepam, but not clonazepam significantly increased the AUC of PaCO<sub>2</sub>. Buprenorphine alone also significantly increased the AUC of PaCO<sub>2</sub>. The combination of buprenorphine with any one of the benzodiazepines did not significantly increase the AUC of PaCO<sub>2</sub> above the effect of buprenorphine alone (Pirnay et al, 2008). A different dimension of complexity is shown in a study where a low dose (1 nmol) of alprazolam potentiated the respiratory depression caused by dermorphin but antagonized the depression at a higher dose (3 nmol) (Paakkari et al, 1993).

*Clinical:* Ample evidence exists concerning the ability of diazepam to induce respiratory depression in humans. Two such studies will be mentioned. Children admitted to hospital for seizures were studied, of 111 cases treated with diazepam, respiratory depression was seen in 11 cases (9%) of whom eight required ventilation (Norris et al, 1999). In another study, diazepam and phenobarbital were compared in adult patients being treated for delirium tremens. Respiratory depression was observed in 4% of the patients treated with phenobarbital and in 1% of patients treated with diazepam (Michaelsen et al, 2010).

## Diazepam

|            |                                                                                                                                                                                                                                                                                                                                                                                                                                                                                                                                                                                                                                                                                                                                                                                                                                                        |
|------------|--------------------------------------------------------------------------------------------------------------------------------------------------------------------------------------------------------------------------------------------------------------------------------------------------------------------------------------------------------------------------------------------------------------------------------------------------------------------------------------------------------------------------------------------------------------------------------------------------------------------------------------------------------------------------------------------------------------------------------------------------------------------------------------------------------------------------------------------------------|
| Label Text | <p>“Black Box Text: <b>WARNING: RISKS FROM CONCOMITANT USE WITH OPIOIDS</b></p> <p>Concomitant use of benzodiazepines and opioids may result in profound sedation, respiratory depression, coma, and death (see Drug Interactions).</p> <ul style="list-style-type: none"><li>• Reserve concomitant prescribing of these drugs for use in patients for whom alternative treatment options are inadequate.</li><li>• Limit dosages and durations to the minimum required.</li><li>• Follow patients for signs and symptoms of respiratory depression and sedation.</li></ul> <p><b>WARNINGS</b></p> <p>Concomitant use of benzodiazepines, including Valium, and opioids may result in profound sedation, respiratory depression, coma, and death. Because of these risks, reserve concomitant prescribing of these drugs for use in patients for</p> ” |
|------------|--------------------------------------------------------------------------------------------------------------------------------------------------------------------------------------------------------------------------------------------------------------------------------------------------------------------------------------------------------------------------------------------------------------------------------------------------------------------------------------------------------------------------------------------------------------------------------------------------------------------------------------------------------------------------------------------------------------------------------------------------------------------------------------------------------------------------------------------------------|

|                    |                                                                                                                                                                                                                                                                                                                                                                                                                                                                                                                                                                                                                                                                                                                                                                                                                                                                                                                                                                                                                                                                                                                                                                                                                                                                                                                                                                                                                                                                                                                                                                                                                                                                                                                                                                                                   |
|--------------------|---------------------------------------------------------------------------------------------------------------------------------------------------------------------------------------------------------------------------------------------------------------------------------------------------------------------------------------------------------------------------------------------------------------------------------------------------------------------------------------------------------------------------------------------------------------------------------------------------------------------------------------------------------------------------------------------------------------------------------------------------------------------------------------------------------------------------------------------------------------------------------------------------------------------------------------------------------------------------------------------------------------------------------------------------------------------------------------------------------------------------------------------------------------------------------------------------------------------------------------------------------------------------------------------------------------------------------------------------------------------------------------------------------------------------------------------------------------------------------------------------------------------------------------------------------------------------------------------------------------------------------------------------------------------------------------------------------------------------------------------------------------------------------------------------|
|                    | <p>whom alternative treatment options are inadequate. Observational studies have demonstrated that concomitant use of opioid analgesics and benzodiazepines increases the risk of drug-related mortality compared to use of opioids alone. If a decision is made to prescribe Valium concomitantly with opioids, prescribe the lowest effective dosages and minimum durations of concomitant use, and follow patients closely for signs and symptoms of respiratory depression and sedation. In patients already receiving an opioid analgesic, prescribe a lower initial dose of Valium than indicated in the absence of an opioid and titrate based on clinical response. If an opioid is initiated in a patient already taking Valium, prescribe a lower initial dose of the opioid and titrate based upon clinical response.</p> <p>Advise both patients and caregivers about the risks of respiratory depression and sedation when Valium is used with opioids. Advise patients not to drive or operate heavy machinery until the effects of concomitant use with the opioid have been determined (see Drug Interactions).</p> <p><b>Drug Interactions</b></p> <p><b>Opioids</b></p> <p>The concomitant use of benzodiazepines and opioids increases the risk of respiratory depression because of actions at different receptor sites in the CNS that control respiration. Benzodiazepines interact at GABA<sub>A</sub> sites and opioids interact primarily at mu receptors. When benzodiazepines and opioids are combined, the potential for benzodiazepines to significantly worsen opioid-related respiratory depression exists. Limit dosage and duration of concomitant use of benzodiazepines and opioids and monitor patients closely for respiratory depression and sedation.”</p> |
| Clinical Dose      | 2 mg TID (0.33 mg/kg)                                                                                                                                                                                                                                                                                                                                                                                                                                                                                                                                                                                                                                                                                                                                                                                                                                                                                                                                                                                                                                                                                                                                                                                                                                                                                                                                                                                                                                                                                                                                                                                                                                                                                                                                                                             |
| Prescription Count | 73.0 million, 244.9 million for alprazolam                                                                                                                                                                                                                                                                                                                                                                                                                                                                                                                                                                                                                                                                                                                                                                                                                                                                                                                                                                                                                                                                                                                                                                                                                                                                                                                                                                                                                                                                                                                                                                                                                                                                                                                                                        |
| AE Data            | <p>FAERS: Diazepam alone (EBGM: 17.1; EB05: 15.5) and in combination with opioids: EBGM: 2.0 – 16.1; EB05: 1.4 – 11.1</p> <p>NPDS: Diazepam represented 7.5% of our pulled cases</p> <p>Toxic: Diazepam was present in 4 of 55 cases of multi-agent fatalities involving opioids</p>                                                                                                                                                                                                                                                                                                                                                                                                                                                                                                                                                                                                                                                                                                                                                                                                                                                                                                                                                                                                                                                                                                                                                                                                                                                                                                                                                                                                                                                                                                              |
| Opinion            | <i>Positive control for rat studies</i>                                                                                                                                                                                                                                                                                                                                                                                                                                                                                                                                                                                                                                                                                                                                                                                                                                                                                                                                                                                                                                                                                                                                                                                                                                                                                                                                                                                                                                                                                                                                                                                                                                                                                                                                                           |

**GABA analog – Gabapentin**

*Nonclinical:* A useful study in rabbits has measured the effect of gabapentin individually and in combination with morphine (Kozler et al, 2008). Animals



pretreated with gabapentin at 25 mg/kg (HED 8 mg/kg) and then injected with morphine at 5 mg/kg (HED 1.6 mg/kg) had a significantly larger increase in PaCO<sub>2</sub> as compared to rabbits pretreated with saline and then injected with morphine. The effect was significant only at 10 and 30 minutes after injection of morphine. The magnitude of the gabapentin effect was smaller (~5 mmHg PaCO<sub>2</sub>) than the effect of the morphine (~15 mmHg PaCO<sub>2</sub>) at the doses tested.

*Clinical:* Several studies have looked at the association between gabapentin as part of surgical anesthesia and post-operative respiratory depression. Two small studies (Bang et al, 2010; Durmus et al, 2007) found no association. However, a large study (8670 patients) found an increased risk of respiratory depression when gabapentin was used, OR 1.47 (95%CI: 1.22, 1.76) (Cavalcante et al, 2016).

### Gabapentin

|                    |                                                                                                                                                                                                                                                                                                                                                                                                                                                                                                                                                                                                   |
|--------------------|---------------------------------------------------------------------------------------------------------------------------------------------------------------------------------------------------------------------------------------------------------------------------------------------------------------------------------------------------------------------------------------------------------------------------------------------------------------------------------------------------------------------------------------------------------------------------------------------------|
| Label Text         | <p>“7.2 <u>Opioids</u><br/> <u>Hydrocodone</u><br/> Coadministration of NEURONTIN with hydrocodone decreases hydrocodone exposure [see Clinical Pharmacology (12.3)]. The potential for alteration in hydrocodone exposure and effect should be considered when NEURONTIN is started or discontinued in a patient taking hydrocodone.<br/> <u>Morphine</u><br/> When gabapentin is administered with morphine, patients should be observed for signs of central nervous system (CNS) depression, such as somnolence, sedation and respiratory depression [see Clinical Pharmacology (12.3)].”</p> |
| Clinical Dose      | 300 mg TID (5 mg/kg each)                                                                                                                                                                                                                                                                                                                                                                                                                                                                                                                                                                         |
| Prescription Count | 254.0 million                                                                                                                                                                                                                                                                                                                                                                                                                                                                                                                                                                                     |
| AE Data            | <p>FAERS: Gabapentin alone (EBGM: 4.0; EB05: 3.4) and in combination with opioids: EBGM: 2.2 – 8.5; EB05: 1.3 – 6.6<br/> NPDS: Gabapentin represented 4.9% of our pulled cases<br/> Toxic: Gabapentin was present in 6 of 55 cases of multi-agent fatalities involving opioids</p>                                                                                                                                                                                                                                                                                                                |
| Opinion            | Nonclinical data sufficient                                                                                                                                                                                                                                                                                                                                                                                                                                                                                                                                                                       |

### Imidazopyridine – Zolpidem

*Nonclinical:* No nonclinical research on the effects of zolpidem on respiratory parameters was identified.

*Clinical:* In a healthy volunteer study, no effect on mean inspiratory drive was seen at 5 or 10 mg doses while a statistically significant decrease was seen with 20 mg at 2 hours only. No change on pCO<sub>2</sub> parameters was observed (Cohn, 1993). In a study of COPD patients treated with 10 mg doses, no changes in respiratory parameters

was observed and pCO<sub>2</sub> and pO<sub>2</sub> on awakening were not altered (Girault et al, 1996). A few case reports of respiratory depression have been published related to suicide attempts (Hamad & Sharma, 2001).

### Zolpidem

|                    |                                                                                                                                                                                                                                                                                                                                                                                                                                                                                                                                                                                                                                                                                                                                                                                                                                                                                                                                                                                                                                                                                                                                                                                                                                                                                                                                                                                                                                                                                         |
|--------------------|-----------------------------------------------------------------------------------------------------------------------------------------------------------------------------------------------------------------------------------------------------------------------------------------------------------------------------------------------------------------------------------------------------------------------------------------------------------------------------------------------------------------------------------------------------------------------------------------------------------------------------------------------------------------------------------------------------------------------------------------------------------------------------------------------------------------------------------------------------------------------------------------------------------------------------------------------------------------------------------------------------------------------------------------------------------------------------------------------------------------------------------------------------------------------------------------------------------------------------------------------------------------------------------------------------------------------------------------------------------------------------------------------------------------------------------------------------------------------------------------|
| Label Text         | <p><b>“5 WARNINGS AND PRECAUTIONS:</b></p> <p><b>5.1 CNS Depressant Effects and Next-Day Impairment</b><br/>           AMBIEN, like other sedative-hypnotic drugs, has central nervous system (CNS) depressant effects. Co-administration with other CNS depressants (e.g., benzodiazepines, opioids, tricyclic antidepressants, alcohol) increases the risk of CNS depression.</p> <p><b>5.6 Respiratory Depression</b><br/>           Although studies with 10 mg zolpidem tartrate did not reveal respiratory depressant effects at hypnotic doses in healthy subjects or in patients with mild-to-moderate chronic obstructive pulmonary disease (COPD), a reduction in the Total Arousal Index, together with a reduction in lowest oxygen saturation and increase in the times of oxygen desaturation below 80% and 90%, was observed in patients with mild-to-moderate sleep apnea when treated with zolpidem compared to placebo. Since sedative-hypnotics have the capacity to depress respiratory drive, precautions should be taken if AMBIEN is prescribed to patients with compromised respiratory function. Post-marketing reports of respiratory insufficiency in patients receiving 10 mg of zolpidem tartrate, most of whom had pre-existing respiratory impairment, have been reported. The risk of respiratory depression should be considered prior to prescribing AMBIEN in patients with respiratory impairment including sleep apnea and myasthenia gravis.”</p> |
| Clinical Dose      | 5 or 10 mg (0.08 or 0.17 mg/kg)                                                                                                                                                                                                                                                                                                                                                                                                                                                                                                                                                                                                                                                                                                                                                                                                                                                                                                                                                                                                                                                                                                                                                                                                                                                                                                                                                                                                                                                         |
| Prescription Count | 194.7 million                                                                                                                                                                                                                                                                                                                                                                                                                                                                                                                                                                                                                                                                                                                                                                                                                                                                                                                                                                                                                                                                                                                                                                                                                                                                                                                                                                                                                                                                           |
| AE Data            | FAERS: Zolpidem alone: EBGM: 5.2; EB05: 4.4<br>NPDS: Zolpidem represented 4.0% of our pulled cases<br>ToxIC: Zolpidem was present in 2 of 55 cases of multi-agent fatalities involving opioids                                                                                                                                                                                                                                                                                                                                                                                                                                                                                                                                                                                                                                                                                                                                                                                                                                                                                                                                                                                                                                                                                                                                                                                                                                                                                          |
| Opinion            | Candidate for rat study                                                                                                                                                                                                                                                                                                                                                                                                                                                                                                                                                                                                                                                                                                                                                                                                                                                                                                                                                                                                                                                                                                                                                                                                                                                                                                                                                                                                                                                                 |

### MAOI – Tranlycypromine

*Nonclinical:* A single nonclinical study in decerebrate cats studied the ability of tranlycypromine (5 mg/kg, HED 1.65 mg/kg) to modulate morphine-induced (2 mg/kg, HED 0.66 mg/kg) respiratory depression. In this model the data showed that

the MAOI stimulated both resting respiration and the response to CO<sub>2</sub>. The values in dual-treated cats were not distinguishable on an absolute basis from the response to morphine alone (Florez et al, 1972).

*Clinical:* No direct information was identified on the ability of this drug to directly affect respiration in humans. The most common serious interaction between MAOI and opiates is serotonin syndrome which has been well documented and will not be further discussed (Gillman 2005).

#### Tranlycypromine

|                    |                                                                                                                                                                                                                                                                                                                                                                                                                                                                                                                                                                                                                                                                                                                                                                                                                                                                                                                                                                                                                                                     |
|--------------------|-----------------------------------------------------------------------------------------------------------------------------------------------------------------------------------------------------------------------------------------------------------------------------------------------------------------------------------------------------------------------------------------------------------------------------------------------------------------------------------------------------------------------------------------------------------------------------------------------------------------------------------------------------------------------------------------------------------------------------------------------------------------------------------------------------------------------------------------------------------------------------------------------------------------------------------------------------------------------------------------------------------------------------------------------------|
| Label Text         | <p><b>“CONTRAINDICATIONS: PARNATE is contraindicated: . . .</b></p> <p><b>8. In combination with meperidine</b></p> <p>Do not use meperidine concomitantly with MAO inhibitors or within 2 or 3 weeks following MAOI therapy. Serious reactions have been precipitated with concomitant use, including coma, severe hypertension or hypotension, severe respiratory depression, convulsions, malignant hyperpyrexia, excitation, peripheral vascular collapse, and death. It is thought that these reactions may be mediated by accumulation of 5-HT (serotonin) consequent to MAO inhibition.</p> <p><b>ADDITIONAL CONTRAINDICATIONS</b></p> <p>In general, the physician should bear in mind the possibility of a lowered margin of safety when PARNATE is administered in combination with potent drugs.</p> <p>PARNATE should not be used in combination with some central nervous system depressants such as narcotics and alcohol, or with hypotensive agents. A marked potentiating effect on these classes of drugs has been reported.”</p> |
| Clinical Dose      | 10 mg TID (0.17 mg/kg each)                                                                                                                                                                                                                                                                                                                                                                                                                                                                                                                                                                                                                                                                                                                                                                                                                                                                                                                                                                                                                         |
| Prescription Count | 0.19 million                                                                                                                                                                                                                                                                                                                                                                                                                                                                                                                                                                                                                                                                                                                                                                                                                                                                                                                                                                                                                                        |
| AE Data            | FAERS: Tranlycypromine alone: EBGM: 0.9; EB05: 0.2                                                                                                                                                                                                                                                                                                                                                                                                                                                                                                                                                                                                                                                                                                                                                                                                                                                                                                                                                                                                  |
| Opinion            | Co-usage likely low due to serotonin syndrome issue. NAI due to low usage                                                                                                                                                                                                                                                                                                                                                                                                                                                                                                                                                                                                                                                                                                                                                                                                                                                                                                                                                                           |

#### SARI – Trazodone:

*Nonclinical:* No nonclinical data on the effect of trazodone on respiratory parameters were identified. In one study in mice, treatment with nefazodone at 50 mg/kg (HED 4.15 mg/kg) did not alter the LD<sub>50</sub> of morphine (Pick et al, 1992).

*Clinical:* Treatment of healthy volunteers with trazodone (50 mg) caused a significant increase in VO<sub>2</sub> at six hours but not earlier (Casali et al, 1977). No human study data on the effect of nefazodone on respiratory parameters were located. In overdose reports, trazodone is not reported to cause fatalities. Some

fatalities have occurred with multiple drugs including trazodone but none of the other drugs in this report were opiates (Gamble & Peterson, 1986).

#### Trazodone

|                    |                                                                                                      |
|--------------------|------------------------------------------------------------------------------------------------------|
| Label Text         | no relevant text located                                                                             |
| Clinical Dose      | 300 mg (5 mg/kg)                                                                                     |
| Prescription Count | 145.8 million                                                                                        |
| AE Data            | FAERS: Trazodone alone: EBGM: 3.8; EB05: 2.8<br>NPDS: Trazodone represented 4.2% of our pulled cases |
| Opinion            | Candidate for rat studies                                                                            |

#### Skeletal muscle relaxants – Baclofen, Carisoprodol or Cyclobenzaprine

*Nonclinical:* For baclofen, there is nonclinical data from studies with guinea pigs at 10 mg/kg (HED 2.2 mg/kg) (Hey et al, 1995) and in cats at 4 mg/kg (HED 1.3 mg/kg) (Taveira da Silva et al, 1987) establishing that this drug causes direct respiratory depression. No nonclinical research on the effects of carisoprodol or cyclobenzaprine on respiratory parameters was identified.

*Clinical:* No clinical studies were located with direct measurement of respiratory parameters and baclofen treatment. Respiratory depression has been noted as an adverse event in baclofen overdose associated with ESRD wherein 2/5 patients required mechanical ventilation (Roberts et al, 2015). Therapeutically baclofen and morphine are used together as an intrathecal pump regimen for control of spasticity and neuropathic pain. Baclofen doses are initially reduced by half when morphine is added (Sadiq & Poopatana, 2007).

For carisoprodol and cyclobenzaprine, no direct nonclinical or clinical studies of respiratory effects were located. Carisoprodol is known to be abused in combination with opiates and sometimes in a triple combination adding benzodiazepines (Horsfall & Sprague, 2017).

#### Baclofen

|                    |                                                                                                                                                                                                                                          |
|--------------------|------------------------------------------------------------------------------------------------------------------------------------------------------------------------------------------------------------------------------------------|
| Label Text         | “ACTIONS . . . In studies with animals, baclofen has been shown to have general CNS depressant properties as indicated by the production of sedation with tolerance, somnolence, ataxia, and respiratory and cardiovascular depression.” |
| Clinical Dose      | 5 mg TID (0.08 mg/kg each)                                                                                                                                                                                                               |
| Prescription Count | 38.7 million                                                                                                                                                                                                                             |
| AE Data            | FAERS: Baclofen alone (EBGM: 12.1, EB05: 10.7) and in combination with opioids: EBGM: 2.2 – 14.7, EB05: 1.5 – 10.9<br>NPDS: Baclofen represented 0.9% of our pulled cases                                                                |
| Opinion            | Nonclinical data sufficient                                                                                                                                                                                                              |

## Carisoprodol

|                    |                                                                                                                                                                                                                                                                                                                                                                                                                                                                                                                                                                                                                         |
|--------------------|-------------------------------------------------------------------------------------------------------------------------------------------------------------------------------------------------------------------------------------------------------------------------------------------------------------------------------------------------------------------------------------------------------------------------------------------------------------------------------------------------------------------------------------------------------------------------------------------------------------------------|
| Label Text         | 5.2 Abuse, Dependence and Withdrawal<br>Carisoprodol, the active ingredient in SOMA, has been subject to abuse, dependence, withdrawal, misuse, and criminal diversion. [see Drug Abuse and Dependence (9.1, 9.2, 9.3)]. Abuse of SOMA poses a risk of overdose which may lead to death, CNS and respiratory depression, hypotension, seizures, and other disorders [see Overdosage (10)].<br>9.2 Abuse<br>Abuse of carisoprodol poses a risk of overdose which may lead to death, CNS and respiratory depression, hypotension, seizures and other disorders [see Warnings and Precautions (5.2) and Overdosage (10)].” |
| Clinical Dose      | 250 mg TID (4.2 mg/kg)                                                                                                                                                                                                                                                                                                                                                                                                                                                                                                                                                                                                  |
| Prescription Count | 36.5 million                                                                                                                                                                                                                                                                                                                                                                                                                                                                                                                                                                                                            |
| AE Data            | FAERS: Carisoprodol alone (EBGM: 5.5, EB05: 4.0) and in combination with opioids: EBGM: 2.7 – 15.9, EB05: 1.7 – 10.1<br>NPDS: carisoprodol represented 3.9% of our pulled cases<br>Toxic: Carisoprodol was present in 4 of 55 cases of multi-agent fatalities involving opioids                                                                                                                                                                                                                                                                                                                                         |
| Opinion            | Candidate for rat studies                                                                                                                                                                                                                                                                                                                                                                                                                                                                                                                                                                                               |

## Cyclobenzaprine

|                    |                                                                                                                                                                                                                                                                                        |
|--------------------|----------------------------------------------------------------------------------------------------------------------------------------------------------------------------------------------------------------------------------------------------------------------------------------|
| Label Text         | “WARNINGS . . . Cyclobenzaprine hydrochloride may enhance the effects of alcohol, barbiturates, and other CNS depressants.”                                                                                                                                                            |
| Clinical Dose      | 5 mg TID (0.08 mg/kg each)                                                                                                                                                                                                                                                             |
| Prescription Count | 140.9 million                                                                                                                                                                                                                                                                          |
| AE Data            | FAERS: Cyclobenzaprine alone (EBGM: 7.4, EB05: 5.5) and in combination with opioids: EBGM: 2.0 – 8.4, EB05: 1.3 – 5.5<br>NPDS: Cyclobenzaprine represented 3.9% of our pulled cases<br>Toxic: Cyclobenzaprine was present in 3 of 55 cases of multi-agent fatalities involving opioids |
| Opinion            | Candidate for rat studies                                                                                                                                                                                                                                                              |

## Paroxetine

*Nonclinical:* No nonclinical studies were located evaluating the effect of paroxetine on respiration. For fluoxetine in an experiment in DBA/1 mice, measured by plethysmography, fluoxetine at 30 mg/kg IP (HED 2.5 mg/kg) caused a significant

reduction in Minute Ventilation and Respiratory Frequency, but not in Tidal Volume. This effect was seen in conscious mice but not in mice anesthetized with isoflurane (Zeng et al, 2015). A study in goats (45 kg) showed that fluoxetine dosed at 1 mg/kg (HED 0.95 mg/kg) caused an increase in PaCO<sub>2</sub> at rest (Henderson et al, 1999).

*Clinical:* No clinical studies were located evaluating the effect of paroxetine on respiration with or without opiates. For fluoxetine in a human study morphine titrated to 60 ng/ml in plasma caused the expected significant respiratory depression measured by End Tidal CO<sub>2</sub> (~5 mm Hg). The addition of fluoxetine at a dose of 30 mg did not alter the morphine-induced respiratory depression (Erjavec et al, 2000).

### Paroxetine

|                    |                                                                                                                                                                                                                                                                                                                                                                                                                                                                                                                                                       |
|--------------------|-------------------------------------------------------------------------------------------------------------------------------------------------------------------------------------------------------------------------------------------------------------------------------------------------------------------------------------------------------------------------------------------------------------------------------------------------------------------------------------------------------------------------------------------------------|
| Label Text         | “Serotonin Syndrome: The development of a potentially life-threatening serotonin syndrome has been reported with SNRIs and SSRIs, including PAXIL, alone but particularly with concomitant use of other serotonergic drugs (including triptans, tricyclic antidepressants, fentanyl, lithium, tramadol, tryptophan, buspirone, and St. John’s Wort) and with drugs that impair metabolism of serotonin (in particular, MAOIs, both those intended to treat psychiatric disorders and also others, such as linezolid and intravenous methylene blue).” |
| Clinical Dose      | 40 mg (0.66 mg/kg)                                                                                                                                                                                                                                                                                                                                                                                                                                                                                                                                    |
| Prescription Count | 78.3 million                                                                                                                                                                                                                                                                                                                                                                                                                                                                                                                                          |
| AE Data            | FAERS: Paroxetine in combination with opioids: EBGM: 2.1 – 4.1; EB05: 1.5 – 2.5<br>NPDS: Paroxetine represented 1.4% of our pulled cases                                                                                                                                                                                                                                                                                                                                                                                                              |
| Opinion            | Nonclinical data for same class drug, fluoxetine, suggests a possible effect. Study in rat to provide interaction data.                                                                                                                                                                                                                                                                                                                                                                                                                               |

### Tricyclic antidepressants – Amitriptyline & Imipramine

*Nonclinical:* In nonclinical studies, imipramine (20 mg/kg) (HED 2.9 mg/kg rat; 10 mg/kg dog) markedly increased respiratory depression caused by morphine (7.5 mg/kg; HED 1 mg/kg rat; 3.85 mg/kg dog) or fentanyl (7.5 µg/ml) in anesthetized dogs or rats (Gavend et al, 1974). Continuous infusion of imipramine in the conscious rat leads to death by respiratory arrest (Zandberg & Sangster, 1982). In rabbits, fentanyl alone (11 µg/kg) caused a significant increase in PaCO<sub>2</sub>. Imipramine alone at 4.35 mg/kg (HED 1.4 mg/kg) had a minimal effect on PaCO<sub>2</sub> (Bergman et al, 1991). Rabbits predosed with amitriptyline (7 mg/kg sc, HED 2.2 mg/kg) had a significantly higher increase in PaCO<sub>2</sub> after morphine injection as compared to saline pretreatment (Kozer et al, 2008). Specifically, the changes were +15 mm Hg for morphine alone and +20 mm Hg for morphine plus amitriptyline

over the baseline value.

*Clinical:* In a clinical study of 40 patients hospitalized for overdose by any tricyclic antidepressant (TCA) 16 patients required supportive ventilation. Amitriptyline and imipramine were taken by 29 of the 40 patients (Biggs et al, 1977).

There are two studies that evaluate the combined effect of amitriptyline and an opiate in healthy volunteers. In the first study buprenorphine (0.4 mg) and amitriptyline (25 mg) were found to cause significant respiratory depression as measured by minute ventilation and end tidal CO<sub>2</sub>. The combination of both drugs significantly increased respiratory depression above that seen with buprenorphine alone (Saarialho-Kere et al, 1987). Strikingly similar findings were seen with the pair of the opiate pentazocine (30 mg) and amitriptyline (25 mg) (Saarialho-Kere et al, 1988).

#### Amitriptyline

|                    |                                                                                                                                                                                  |
|--------------------|----------------------------------------------------------------------------------------------------------------------------------------------------------------------------------|
| Label Text         | “WARNINGS . . . Amitriptyline hydrochloride may enhance the response to alcohol and the effects of barbiturates and other CNS depressants.”                                      |
| Clinical Dose      | 100 mg (1.67 mg/kg)                                                                                                                                                              |
| Prescription Count | 70.4 million                                                                                                                                                                     |
| AE Data            | FAERS: Amitriptyline alone (EBGM: 8.2; EB05: 6.8) and in combination with opioids: EBGM: 2.2 – 12.5; EB05: 1.4 – 9.5<br>NPDS: Amitriptyline represented 5.4% of our pulled cases |
| Opinion            | Nonclinical evidence of weak additional respiratory depression is clear and confirmed by clinical studies. Additional nonclinical studies not suggested.                         |

#### Imipramine

|                    |                                                                                                                                                          |
|--------------------|----------------------------------------------------------------------------------------------------------------------------------------------------------|
| Label Text         | no relevant text located                                                                                                                                 |
| Clinical Dose      | 50 mg BID (0.8 mg/kg each)                                                                                                                               |
| Prescription Count | 5.7 million                                                                                                                                              |
| AE Data            | FAERS: Imipramine alone: EBGM: 3.7; EB05: 2.1<br>NPDS: Imipramine represented 0.2% of our pulled cases                                                   |
| Opinion            | Nonclinical evidence of weak additional respiratory depression is clear and confirmed by clinical studies. Additional nonclinical studies not suggested. |

#### Typical Antipsychotics – Haloperidol & Thioridazine

*Nonclinical:* A nonclinical study in mice showed that haloperidol at doses above 0.5 mg/kg (HED 0.04 mg/kg) caused a significant reduction in respiratory rate. In combination with morphine, haloperidol at 1.0 mg/kg (HED 0.08 mg/kg) but not at 0.25 mg/kg (HED 0.02 mg/kg) caused significant respiratory depression above the effect of morphine alone (McGilliard & Takemori, 1979). In rats given a continuous

infusion of thioridazine, PaO<sub>2</sub> decreased in concert with decreasing cardiac parameters but PaCO<sub>2</sub> was unaffected until terminal respiratory acidosis set in (Langemeijer et al 1985).

*Clinical:* In a study in healthy volunteers, nalbuphine caused respiratory depression but haloperidol at 0.5 mg/day had no effect on the nalbuphine-induced respiratory depression (Saarialho-Kere, 1988). A similar lack of effect of haloperidol was seen in COPD patients treated with 5 mg haloperidol IM (Tandon 1976).

#### Haloperidol

|                    |                                                                                                                                                                                                                          |
|--------------------|--------------------------------------------------------------------------------------------------------------------------------------------------------------------------------------------------------------------------|
| Label Text         | “Drug Interactions<br>Pharmacodynamic Interactions . . .<br>As with other antipsychotic agents, it should be noted that HALDOL may be capable of potentiating CNS depressants such as anesthetics, opiates and alcohol.” |
| Clinical Dose      | 5 mg IM (0.08 mg/kg)                                                                                                                                                                                                     |
| Prescription Count | 16.3 million                                                                                                                                                                                                             |
| AE Data            | FAERS: Haloperidol alone (EBGM: 4.1; EB05: 3.3) and in combination with opioids: EBGM: 2.6 – 7.7; EB05: 1.6 – 6.0<br>NPDS: Haloperidol represented 0.2% of our pulled cases                                              |
| Opinion            | Nonclinical data sufficient. Given the lack of clinical effect additional nonclinical studies are not suggested.                                                                                                         |

#### Thioridazine

|                    |                                                                                                                                                                                                                                                                                                                                                                                                                                                                                         |
|--------------------|-----------------------------------------------------------------------------------------------------------------------------------------------------------------------------------------------------------------------------------------------------------------------------------------------------------------------------------------------------------------------------------------------------------------------------------------------------------------------------------------|
| Label Text         | “WARNINGS . . . Central Nervous System Depressants<br>As in the case of other phenothiazines, thioridazine is capable of potentiating central nervous system depressants (e.g., alcohol, anesthetics, barbiturates, narcotics, opiates, other psychoactive drugs, etc.) as well as atropine and phosphorus insecticides. Severe respiratory depression and respiratory arrest have been reported when a patient was given a phenothiazine and a concomitant high dose of a barbiturate” |
| Clinical Dose      | 50-100 mg TID (0.8 – 1.6 mg/kg each)                                                                                                                                                                                                                                                                                                                                                                                                                                                    |
| Prescription Count | 0.97 million, promethazine 56.0 million                                                                                                                                                                                                                                                                                                                                                                                                                                                 |
| AE Data            | FAERS: Thioridazine alone: EBGM: 3.01; EB05: 1.9                                                                                                                                                                                                                                                                                                                                                                                                                                        |
| Opinion            | Nonclinical data sufficient. Given the lack of clinical effect additional nonclinical studies are not suggested.                                                                                                                                                                                                                                                                                                                                                                        |

#### Other Drugs – Meprobamate (carbamate, GABA<sub>A</sub> agonist)

*Nonclinical:* No nonclinical research on the effects of meprobamate on respiratory parameters was identified.

*Clinical:* An analysis of meprobamate overdoses at the Massachusetts General Hospital from 1962 to 1975 was performed and included 50 admissions and 49



patients (Allen 1977). In the 15 cases that were attributed to meprobamate alone, five required assisted ventilation, and six reached grade 3 or 4 coma. One case included apneic episodes after ingestion of 18 grams of meprobamate.

A case report of a 52-year-old female who ingested 30-40 grams of meprobamate was found to be in respiratory failure upon admission (Lobo 1977). She subsequently regained consciousness approximately 54 hours after admission.

A prospective multi-center study in Oslo that included 1125 self-poisonings over the course of one year found that 15 cases of meprobamate overdosages led to grades 3 or 4 coma (5.3% of all grades 3 or 4 coma cases) (Jacobsen 1984). Additionally, out of 32 cases where meprobamate was the primary agent, five were complicated by respiratory depression.

### Meprobamate

|                    |                                                                                                                                                                                                                                                        |
|--------------------|--------------------------------------------------------------------------------------------------------------------------------------------------------------------------------------------------------------------------------------------------------|
| Label Text         | “WARNINGS... Since the effects of meprobamate and alcohol or meprobamate and other CNS depressants or psychotropic drugs may be additive, appropriate caution should be exercised with patients who take more than one of these agents simultaneously. |
| Clinical Dose      | 1200-1600 mg daily in 3-4 divided doses (20 – 27 mg/kg each)                                                                                                                                                                                           |
| Prescription Count | 0.26 million                                                                                                                                                                                                                                           |
| AE Data            | FAERS: Meprobamate alone (EBGM: 8.3; EB05: 5.0) and in combination with opioids: EBGM: 6.2 – 6.6; EB05: 4.1 – 5.6<br>NPDS: Meprobamate represented 0.1% of our pulled cases                                                                            |
| Opinion            | NAI due to low usage and existing label text.                                                                                                                                                                                                          |

### Other Drugs – Dextromethorphan (Morphinan)

*Nonclinical:* A nonclinical study showed that male Wistar rats administered 10 mg/kg (HED 1.4 mg/kg) intraperitoneally with increasing doses of morphine (maximum 2.5 mg/kg) or fentanyl (maximum 0.16 mg/kg) experienced significantly higher pCO<sub>2</sub> values than when administered morphine (maximum 40 mg/kg) or fentanyl (maximum 2.5 mg/kg) alone (Hoffmann 2003). Other respiratory parameters measured, which included pO<sub>2</sub>, and O<sub>2</sub>, did not show a significant difference between the opioid alone and the opioid combined with dextromethorphan.

*Clinical:* In contrast, a placebo-controlled cross-over study conducted in 12 healthy volunteers showed that 60 mg of dextromethorphan did not potentiate the respiratory depressive effects of 60 mg of morphine as measured by the decrease in slope of the minute volume/CO<sub>2</sub> dose response curve (Jansinski 2000).

### Dextromethorphan

|            |                                        |
|------------|----------------------------------------|
| Label Text | no relevant text located               |
| Clinical   | 30 mg every 6-8 hours (0.5 mg/kg each) |

|         |                                                                                                                                                                                         |
|---------|-----------------------------------------------------------------------------------------------------------------------------------------------------------------------------------------|
| Dose    |                                                                                                                                                                                         |
| AE Data | FAERS: Dextromethorphan alone (EBGM: 2.4; EB05: 1.5) and in combination with opioids: EBGM: 3.2 – 20.4; EB05: 1.9 – 12.9<br>NPDS: Dextromethorphan represented 0.6% of our pulled cases |
| Opinion | NAI, massive OTC usage, clinical data suggests no issue.                                                                                                                                |

### **Other Drugs – Mirtazapine (Noradrenergic and specific serotonergic antidepressant)**

No literature data was found regarding mirtazapine and respiratory depression in animals or humans. Further, no data was found regarding the effects of mirtazapine combined with opioids.

#### **Mirtazapine**

|                    |                                                                                                                                                                               |
|--------------------|-------------------------------------------------------------------------------------------------------------------------------------------------------------------------------|
| Label Text         | no relevant text located                                                                                                                                                      |
| Clinical Dose      | 15 mg daily (0.25 mg/kg)                                                                                                                                                      |
| Prescription Count | 58.4 million                                                                                                                                                                  |
| AE Data            | FAERS: Mirtazapine alone (EBGM: 2.1; EB05: 1.5) and in combination with opioids: EBGM: 2.3 – 20.5; EB05: 1.6 – 13.3<br>NPDS: Mirtazapine represented 1.3% of our pulled cases |
| Opinion            | Candidate for rat study                                                                                                                                                       |

### **Other Drugs – Bupropion: Norepinephrine-dopamine reuptake inhibitor (NDRI)**

No literature data was found regarding bupropion and respiratory depression in animals or humans. Further, no data was found regarding the effects of bupropion combined with opioids.

#### **Bupropion**

|                    |                                                                                                                                                                       |
|--------------------|-----------------------------------------------------------------------------------------------------------------------------------------------------------------------|
| Label Text         | no relevant text located                                                                                                                                              |
| Clinical Dose      | 100 mg BID (immediate release); 150 mg daily (extended release) {1.7 mg/kg IR, 2.5 mg/kg ER}                                                                          |
| Prescription Count | 151.6 million                                                                                                                                                         |
| AE Data            | FAERS: Bupropion alone (EBGM: 0.7; EB05: 0.5) and in combination with opioids: EBGM: 2.2 – 6.0; EB05: 1.4 – 3.7<br>NPDS: Bupropion represented 2% of our pulled cases |
| Opinion            | NAI as the drug is not clinically sedating.                                                                                                                           |

### **Duloxetine**

No literature data was found regarding duloxetine and respiratory depression in

animals or humans. Further, no data was found regarding the effects of mirtazapine combined with opioids.

### Duloxetine

|                    |                                                                                                                                                                                                                                                                                                                                                                                                                                                                                                                                                                                                                                          |
|--------------------|------------------------------------------------------------------------------------------------------------------------------------------------------------------------------------------------------------------------------------------------------------------------------------------------------------------------------------------------------------------------------------------------------------------------------------------------------------------------------------------------------------------------------------------------------------------------------------------------------------------------------------------|
| Label Text         | <p>“WARNINGS... CNS Acting Drugs — Given the primary CNS effects of duloxetine delayed-release capsules, it should be used with caution when it is taken in combination with or substituted for other centrally acting drugs, including those with a similar mechanism of action”</p> <p>“Serotonin Syndrome: Serotonin syndrome has been reported with SSRIs and SNRIs, including with CYMBALTA, both when taken alone, but especially when co-administered with other serotonergic agents (including triptans, tricyclic antidepressants, fentanyl, lithium, tramadol, tryptophan, buspirone, amphetamines, and St. John’s Wort).”</p> |
| Clinical Dose      | 20 mg BID to 60 mg daily (0.3 to 1 mg/kg)                                                                                                                                                                                                                                                                                                                                                                                                                                                                                                                                                                                                |
| Prescription Count | 105.5 million                                                                                                                                                                                                                                                                                                                                                                                                                                                                                                                                                                                                                            |
| AE Data            | <p>FAERS: Duloxetine in combination with opioids: EBGM: 2.0 – 8.4; EB05: 1.6 – 5.4</p> <p>NPDS: Duloxetine represented 1.6% of our pulled cases</p>                                                                                                                                                                                                                                                                                                                                                                                                                                                                                      |
| Opinion            | Candidate for rat study                                                                                                                                                                                                                                                                                                                                                                                                                                                                                                                                                                                                                  |

### Other Drugs – Venlafaxine (SNRI)

No literature data was found regarding venlafaxine and respiratory depression in animals or humans. Further, no data was found regarding the effects of venlafaxine combined with opioids.

### Venlafaxine

|            |                                                                                                                                                                                                                                                                                                                                                                                                                                                                                                                                                                                                                                                                                                                                                                                                                                                           |
|------------|-----------------------------------------------------------------------------------------------------------------------------------------------------------------------------------------------------------------------------------------------------------------------------------------------------------------------------------------------------------------------------------------------------------------------------------------------------------------------------------------------------------------------------------------------------------------------------------------------------------------------------------------------------------------------------------------------------------------------------------------------------------------------------------------------------------------------------------------------------------|
| Label Text | <p>“PRECAUTIONS... The risk of using venlafaxine in combination with other CNS-active drugs has not been systematically evaluated (except in the case of those CNS-active drugs noted above). Consequently, caution is advised if the concomitant administration of venlafaxine and such drugs is required”</p> <p>“The development of a potentially life-threatening serotonin syndrome has been reported with SNRIs and SSRIs, including Effexor, alone but particularly with concomitant use of other serotonergic drugs (including triptans, tricyclic antidepressants, fentanyl, lithium, tramadol, tryptophan, buspirone, and St. John's Wort) and with drugs that impair metabolism of serotonin (in particular, MAOIs, both those intended to treat psychiatric disorders and also others, such as linezolid and intravenous methylene blue).</p> |
|------------|-----------------------------------------------------------------------------------------------------------------------------------------------------------------------------------------------------------------------------------------------------------------------------------------------------------------------------------------------------------------------------------------------------------------------------------------------------------------------------------------------------------------------------------------------------------------------------------------------------------------------------------------------------------------------------------------------------------------------------------------------------------------------------------------------------------------------------------------------------------|

|                    |                                                                                                                 |
|--------------------|-----------------------------------------------------------------------------------------------------------------|
| Clinical Dose      | 75 mg daily in 2-3 divided doses (immediate release); 37.5 mg – 75 mg daily (extended release) (1.25 mg/kg/day) |
| Prescription Count | 102.8 million                                                                                                   |
| AE Data            | FAERS: Venlafaxine alone: EBGGM: 2.3; EB05: 1.9<br>NPDS: Venlafaxine represented 2.8% of our pulled cases       |
| Opinion            | NAI, group represented by duloxetine                                                                            |

### Other Drugs – Topiramate (GABA agonist)

*Nonclinical:* No nonclinical research on the effects of topiramate on respiratory parameters was identified.

*Clinical:* A case report discussed a 37-year-old female patient who ingested an unknown amount of topiramate and required ventilation due to seizures and loss of consciousness (Lynch 2010). Prior to ventilation, the patient experienced metabolic acidosis with a pH of 7.26, pCO<sub>2</sub> of 41 mmHg, and a pO<sub>2</sub> of 320 mmHg. Initial serum topiramate levels were measured at 356.6 µg/mL (reference: 5-20 µg/mL).

#### Topiramate

|                    |                                                                                                                                                                                                                                                                                                                                                                                                           |
|--------------------|-----------------------------------------------------------------------------------------------------------------------------------------------------------------------------------------------------------------------------------------------------------------------------------------------------------------------------------------------------------------------------------------------------------|
| Label Text         | “DRUG INTERACTIONS... Concomitant administration of topiramate and alcohol or other CNS depressant drugs has not been evaluated in clinical studies. Because of the potential of topiramate to cause CNS depression, as well as other cognitive and/or neuropsychiatric adverse reactions, topiramate should be used with extreme caution if used in combination with alcohol and other CNS depressants.” |
| Clinical Dose      | 25-50 mg daily (0.4 – 0.8 mg/kg)                                                                                                                                                                                                                                                                                                                                                                          |
| Prescription Count | 62.6 million                                                                                                                                                                                                                                                                                                                                                                                              |
| AE Data            | FAERS: Topiramate alone (EBGM: 1.1; EB05: 0.7) and in combination with tramadol: EBGGM: 2.2; EB05: 1.4<br>NPDS: Topiramate represented 0.9% of our pulled cases                                                                                                                                                                                                                                           |
| Opinion            | Candidate for rat study                                                                                                                                                                                                                                                                                                                                                                                   |

### Other Drugs – Ramelteon (melatonin analog)

*Nonclinical:* No nonclinical research on the effects of ramelteon on respiratory parameters was identified.

*Clinical:* A placebo-controlled cross-over study funded by the manufacturer, Takeda, found that 16 mg of ramelteon does not induce respiratory depression during sleep in patients with mild to moderate sleep apnea (Kryger 2007). Respiratory endpoints included mean oxygen saturation (SpO<sub>2</sub>) and Apnea Hypopnea Index (AHI) scores.

Additionally, another placebo-controlled cross-over study funded by Takeda found

that 8 mg of ramelteon does not induce respiratory depression during sleep in patients with moderate to severe chronic obstructive pulmonary disease (COPD) (Kryger 2009). Respiratory endpoints included mean oxygen saturation (SpO<sub>2</sub>).

#### Ramelteon

|                    |                                                                                                             |
|--------------------|-------------------------------------------------------------------------------------------------------------|
| Label Text         | No relevant text                                                                                            |
| Clinical Dose      | 8 mg before bed (0.13 mg/kg)                                                                                |
| Prescription Count | 1.4 million                                                                                                 |
| AE Data            | No cases were present in ToxIC, FAERS, or NPDS.                                                             |
| Opinion            | Clinical data sufficient for direct effect but no data on interaction with opiates, candidate for rat study |

#### Other Drugs – Suvorexant (orexin agonist)

*Nonclinical:* No nonclinical research on the effects of suvorexant on respiratory parameters was identified.

*Clinical:* A placebo-controlled cross-over study funded by the manufacturer, Merck, found that 40 mg or 150 mg of suvorexant does not induce respiratory depression during sleep in healthy human subjects (Uemura 2015). Respiratory endpoints included mean oxygen saturation (SpO<sub>2</sub>) and Apnea Hypopnea Index (AHI) scores.

#### Suvorexant

|                    |                                                                                                                                                                                                                                                                                                                                                                                                                                                                                                                                    |
|--------------------|------------------------------------------------------------------------------------------------------------------------------------------------------------------------------------------------------------------------------------------------------------------------------------------------------------------------------------------------------------------------------------------------------------------------------------------------------------------------------------------------------------------------------------|
| Label Text         | “WARNINGS AND PRECAUTIONS...Co-administration with other CNS depressants (e.g., benzodiazepines, opioids, tricyclic antidepressants, alcohol) increases the risk of CNS depression. Patients should be advised not to consume alcohol in combination with BELSOMRA because of additive effects. Dosage adjustments of BELSOMRA and of concomitant CNS depressants may be necessary when administered together because of potentially additive effects. The use of BELSOMRA with other drugs to treat insomnia is not recommended.” |
| Clinical Dose      | 10 mg before bed (0.17 mg/kg)                                                                                                                                                                                                                                                                                                                                                                                                                                                                                                      |
| Prescription Count | 0.8 million in 2 years, extrapolated to ~2.5 million over five years                                                                                                                                                                                                                                                                                                                                                                                                                                                               |
| AE Data            | FAERS: Suvorexant alone: EBGm: 2.6; EB05: 1.4                                                                                                                                                                                                                                                                                                                                                                                                                                                                                      |
| Opinion            | Add due to interaction concern from Psych                                                                                                                                                                                                                                                                                                                                                                                                                                                                                          |

## References for Drug Selection:

Allen MA, Greenblatt DJ, and Noel BJ. (1977) Meprobamate Overdosage: A Continuing Problem. *Clin Toxicol* **11**, 501-15.

Bang SR, Yu SK, Kim TH. (2010) Can gabapentin help reduce postoperative pain in arthroscopic rotator cuff repair? A prospective, randomized, double-blind study. *Arthroscopy* **9s1**, S106-S111.

Bergman SA, Wynn RL, Alvarez, Asher K, Thut PD. (1991) Imipramine-fentanyl antinociception in a rabbit tooth pulp model. *Life Sci* **49**, 1279-1288.

Billingsley ML & Suria A. (1982) Effects of peripherally administered GABA and other amino acids on cardiopulmonary responses in anesthetized rats and dogs. *Arch Int Pharmacodyn Ther* **255**, 131-40.

Biggs JT, Spiker DG, Petit JM, Ziegler VE. (1977) Tricyclic antidepressant overdose, Incidence of symptoms. *JAMA* **238** 135-138.

Casali L, Pozzi E, Rampulla C, Serra R. (1977) Psychotropic drugs: influence on respiratory function. *Int J Clin Pharmacol* **15**, 480-484.

Cavalcante AN, Sprung J, Schroeder DR, Weingarten, TN. (2016) Multimodal analgesic therapy with gabapentin and its association with postoperative respiratory depression. *Anesth Analg* epub, 6 p.

Ciranni MA, Kearney TE, Olson KR. (2009) Comparing acute toxicity of first- and second-generation antipsychotic drugs: A 10-year, retrospective study. *J Clin Psychiat* **70**, 122-129.

Cohn MA. (1993) Effects of zolpidem, codeine phosphate and placebo on respiration. *Drug Safety* **9**, 312-319.

Durmus M, but AK, Saticicek V, Toprak I, Ersoy MO. (2007) The post-operative analgesic effects of a combination of gabapentin and paracetamol in patients undergoing abdominal hysterectomy: a randomized clinical trial. *Acat Anaesthesiol Scand* **51**, 299-304.

Egelhoff JC, Ball WS, Koch BL, Parks TD (1997) Safety and efficacy of sedation in children using a structure sedation program. *Am J Roentgenol* **168**, 1259-1262.

Erjavec MK, Coda BA, Nguyen Q, Donaldson G, Risler L, Shen DD. (2000) Morphine-fluoxetine interactions in healthy volunteers: Analgesia and side effects. *J Clin Pharmacol* **40**, 1286-1295.

Field KJ, White WJ, Lang CM. (1993) Anaesthetic effects of chloral hydrate, pentobarbitone and urethane in adult male rats. *Lab Anim* **27**, 258-269.

Florez J, Delgado G, Armijo JA (1972) Adrenergic and serotonergic mechanisms in morphine-induced respiratory depression. *Psychopharmacologis (Berl)*. **24**, 25-274.

- Gamble DE, Peterson LG. (1986) Trazodone overdose: Four years of experience from voluntary reports. *J Clin Psychiat* **47**, 544-546.
- Gasser JC, Kaufman RD, Bellville JW. (1975) Respiratory effects of lorazepam, pentobarbital, and pentazodine. *Clin Pharm Therap* **18**, 170-174.
- Gavend M, Dumousseau AM, Gavend MR, Bessard G. (1974) Etude expérimentale des interactions exercées par les imipraminiques sur la dépression respiratoire et l'hypotension produite par les morphiniques. *Thérapie* **29**, 883-897.
- Gillman PK (2005) Monoamine oxidase inhibitors, opioid analgesics and serotonin toxicity. *Br J Anaesth* **95**, 434-441.
- Girault C, Muir J-F, Mihaltan F, Borderies P, Giclais B, Verdure A, Samson-Dolfas D. (1996) Effects of repeated administration of zolpidem on sleep, diurnal and nocturnal respiratory function, vigilance, and physical performance in patients with COPD. *Chest* **110**, 1203-1211.
- Gueye PN, Borron SW, Risede P, Monier C, buneauz F, Debray M, Baud FJ. (2002) Buprenorphine and midazolam act in combination to depress respiration in the rat. *Tox Sci* **65**, 107-114.
- Gummin DD, Mowry JB, Beuhler MC, Spyker DA, Brooks DE, Dibert KW, Rivers LJ, Pham NPT, Ryan ML. (2020) 2019 Annual Report of the American Association of Poison Control Centers' National Poison Data System (NPDS): 37<sup>th</sup> Annual Report. *Clin Toxicol (Phila)* **58**, 1360-1541.
- Hamad A, Sharma N. (2001) Acute zolpidem overdose leading to coma and respiratory failure. *Intensive Care Med* **27**, 1239.
- Henderson DR, Konkle DM Mitchell GS. (1999) Effects of serotonin re-uptake inhibition on ventilator control in goats. *Resp Physiol* **115**, 1-10.
- Hey JA, Mingo G, Bolser DC Kreutner W, Krobatsch D, Chapman RW. (1995) Respiratory effects of baclofen and 3-aminopropylphosphinic acid in guinea pigs. *Br J Pharmacol* **114**, 735-738.
- Hoffmann VLH, et al. (2003) Effects of NMDA receptor antagonists on opioid-induced respiratory depression and acute antinociception in rats. *Pharmacol Biochem Behav* **74**, 933-41.
- Horsfall JE & Spratgue JE. (2017) The pharmacology and toxicology of the 'Holy Trinity'. *Basic Clin Pharmacol Toxicol* **120**, 115-119.
- Jacobsen D, et al. (1984) Clinical Course in Acute Self-poisonings: A Prospective Study of 1125 Consecutively Hospitalised Adults. *Human Toxicol* **3**, 107-16.
- Jansinski DR. (2000) Abuse Potential of Morphine/Dextromethorphan Combinations. *J*

*Pain Symptom Manage* **19**, S26-30.

Koppel C, Ibe K, Tenczer J. (1987) Clinical symptomology of diphenhydramine overdose: an evaluation of 136 cases from 1982 to 1985. *J Toxicol Clin Toxicol* **25**, 53-70.

Kozer E, Levichek Z, Hoshino N, Kapur B, Leobruno J, Taguchi N, Garcia-Bournissen F., Koren G, Ito, S. (2008) The effect of amitriptyline, gabapentin, and carbamazepine on morphine-induced hypercarbia in rabbits. *Anesth Analg* **107**, 1216-1222.

Kryger M, Wang-Weigand S, and Roth T. (2007) Safety of ramelteon in individuals with mild to moderate obstructive sleep apnea. *Sleep Breath* **11**, 159-164.

Kryger M, et al. (2009) The effects of ramelteon on respiration during sleep in subjects with moderate to severe chronic obstructive pulmonary disease. *Sleep Breath* **13**, 79-84.

Langemeijer JJM, De Wildt DJ, De Groot G, Sangster B. (1985) Cardiorespiratory depression and haemolysis due to thioridazine overdose in the rat. *J Pharm Pharmacol* **37**, 481-482.

Lobo PI, et al. (1977) Use of hemodialysis in meprobamate overdosage. *Clin Nephrol* **7**, 73-5.

Lynch MJ, et al. (2010) Clinical Effects and Toxicokinetic Evaluation Following Massive Topiramate Ingestion. *J Med Toxicol* **6**, 135-138.

McCormick GY, White WJ, Zagon IS, Lang CM. (1984) Effects of diazepam on arterial blood gas concentrations and pH of adult rats acutely and chronically exposed to methadone. *J Pharmacol Exp Therap* **230**, 353-359.

McGilliard KL & Takemore AE. (1979) The effect of dopaminergic modifiers on morphine-induced analgesia and respiratory depression. *Eur J Pharmacol* **54**, 61-68.

Michealsen IH, Anderson JE, Fink-Jensen A, Allerup P, Ulrichsen J. (2010) Phenobarbital versus diazepam for delirium tremens – a retrospective study. *Dan Med Bull* **57**, A4169.

Norris E, Marzouk O, Nunn A, McIntyre J, Choonara I. (1999) Respiratory depression in children receiving diazepam for acute seizures: a prospective study. *Dev Med Child Neurol* **41**, 340-343.

Paakkari P, Paakkari I, Landes P, Siren AL, Geuerstein G. (1993) Respiratory  $\mu$ -opioid and benzodiazepine interactions in the unrestrained rat. *Neuropharm* **32**, 323-329.

Pick CG, Paul D, Eison MS, Pasternak GW (1992) Potentiation of opioid analgesia by the antidepressant nefazodone. *Eur J Pharmacol* **211**, 375-381.

Pirnay SO, Megarbane B, Borron SW, Risede P, Monier C, Ricordel I, Baud FJ. (2008) Effects of various combinations of benzodiazepines with buprenorphine on arterial blood gases in rats. *Basic Clin Pharmacol Toxicol* **103**, 228-239.



Roberts JK, Wesphal S, Sparks K. (2015) Iatrogenic baclofen neurotoxicity in ESRD: Recognition and management. *Semin Dialysis* **28**, 525-529.

Saarialho-Kere U, Mattila MJ, Paloheimo M, Seppala T (1987) Psychomotor, respiratory and neuroendocrinological effects of buprenorphine and amitriptyline in healthy volunteers. *Eur J Clin Pharmacol* **33**, 139-146.

Saarialho-Kere U. (1988) Psychomotor, respiratory and neuroendocrinological effects of nalbuphine and haloperidol, alone and in combination, in healthy subjects. *Br J Clin Pharmacol* **26**, 79-87.

Saarialho-Kere U, Mattila MJ, Seppala T (1988) Parenteral pentazocine: effects on psychomotor skills and respiration, and interactions with amitriptyline. *Eur J Clin Pharmacol* **35**, 483-489.

Saarialho-Kere U, Mattila MJ, Seppala T (1989) Psychomotor, respiratory and neuroendocrinological effects of a  $\mu$ -opioid receptor agonist (oxycodone) in healthy volunteers. *Pharmacol Toxicol* **65**, 525-527.

Sadiq SA & Poopatana CA (2007) Intrathecal baclofen and morphine in multiple sclerosis patients with severe pain and spasticity. *J Neurol* **254**, 1464-1465.

Tandon MK (1976) Effect on respiration of diazepam, chlorpromazine and haloperidol in patients with chronic airways obstruction. *Aust N Z Med* **6**, 561-565.

Taveira da Silva AM, Hartley B, Hamosh P, Quest JA, Gillis RA. (1987) Respiratory depressant effect of GABA  $\alpha$ - and  $\beta$ -receptor agonists in the cat. *J Appl Physiol* **62**, 2264-2272.

Uemura N, et al. (2015) Effects of the Orexin Receptor Antagonist Suvorexant on Respiration During Sleep in Healthy Subjects. *J Clin Pharmacol* **55** 1093-100.

Wax PM, Kleinschmidt KC, Brent J, ACMT ToxIC Case Registry Investigators. The Toxicology Investigators Consortium (ToxIC) Registry. *J Med Toxicol.* (2011) **7**(4):259-65.

Zandberg P & Sangster B. (1982) The influence of physostigmine on respiratory and circulatory changes caused by overdoses of orphenadrine or imipramine in the rat. *Acta pharmacol et toxicol* **50**, 185-195.

Zeng C, Long X, Cotton JF, Forman SA, Solt K, Faingold CL, Feng, HJ. (2015) Fluoxetine prevents respiratory arrest without enhancing ventilation in DBA/1 mice. *Epileps Behav* **45**, 1-7.

**Table S2: Dosing solutions or suspensions**

| SPD drug        | Dose for combination treatment (mg/kg) | Drug concentration in dosing solution (mg/ml) | Solvent (%)      |                                   |                       |              |               |               |                          | Dosage form |
|-----------------|----------------------------------------|-----------------------------------------------|------------------|-----------------------------------|-----------------------|--------------|---------------|---------------|--------------------------|-------------|
|                 |                                        |                                               | Propylene glycol | Polyethylene Glycol 400 (PEG 400) | 0.5% Methyl cellulose | 100% Ethanol | Sterile water | NEOBEE® M-5 @ | Dimethyl formamide (DMF) |             |
| Carisoprodol    | 50                                     | 12.5                                          |                  |                                   | 30                    | 30           | 40            |               |                          | Solution    |
| Clozapine       | 25                                     | 12.5                                          | 75               | 25                                |                       |              |               |               |                          | Solution    |
| Cyclobenzaprine | 30                                     | 15                                            |                  |                                   |                       |              | 100           |               |                          | Solution    |
| Duloxetine      | 50                                     | 25                                            | 75               | 25                                |                       |              |               |               |                          | Solution    |
| Mirtazapine     | 50                                     | 25                                            | 75               | 25                                |                       |              |               |               |                          | Solution    |
| Paroxetine      | 50 or 5                                | 25 or 2.5                                     | 50               | 50                                |                       |              |               |               |                          | Solution    |
| Quetiapine      | 250 or 25                              | 62.5 or 6.25                                  | 75               | 25                                |                       |              |               |               |                          | Solution    |
| Ramelteon       | 30                                     | 3.75                                          |                  |                                   | 25                    | 25           | 50            |               |                          | Solution    |
| Risperidone     | 10                                     | 5                                             | 75               | 25                                |                       |              |               |               |                          | Solution    |
| Suvorexant      | 60                                     | 15                                            |                  |                                   |                       |              |               | 70            | 30                       | Solution    |
| Topiramate      | 20                                     | 10                                            | 75               | 25                                |                       |              |               |               |                          | Solution    |
| Trazodone       | 100                                    | 50                                            | 75               | 25                                |                       |              |               |               |                          | Suspension  |
| Zolpidem        | 50                                     | 12.5                                          | 75               | 25                                |                       |              |               |               |                          | Solution    |

@ NEOBEE® M-5 is a caprylic/capric triglyceride. It is made using glycerol from vegetable oil sources and medium-chain fatty acids from coconut and palm kernel oils (Stepan Specialty Products, LLC, NJ, USA).

## Bioanalytical Methods

Liquid chromatography tandem mass spectrometric assay methods were developed and validated to support the analysis of preclinical study samples. All the assays were developed with the aim of high sensitivity with reliable quantitation. While optimizing the lower limit of quantitation (LLOQ) of each analyte, various parameters like signal to noise, accuracy, and precision were evaluated. The upper limit of quantitation (ULOQ) was selected based on the concentration at which acceptable linearity range was observed (i.e., concentration vs linear detector response). All the methods were validated as per the current FDA bioanalytical method validation guidance. The details of individual methods are described below.

| Analyte                                                             | Mass Spectrometer Conditions                                                                                                                            | Liquid Chromatographic Conditions                                                                                                                                                                                                                                                                                                                                                                                                                                              | Sample Pretreatment                                                                                                                                                                                                                                                                                                                                                                                         |
|---------------------------------------------------------------------|---------------------------------------------------------------------------------------------------------------------------------------------------------|--------------------------------------------------------------------------------------------------------------------------------------------------------------------------------------------------------------------------------------------------------------------------------------------------------------------------------------------------------------------------------------------------------------------------------------------------------------------------------|-------------------------------------------------------------------------------------------------------------------------------------------------------------------------------------------------------------------------------------------------------------------------------------------------------------------------------------------------------------------------------------------------------------|
| <b>Clozapine</b><br><b>Linearity:</b><br>0.5 to 1000<br>ng/mL       | <b>Thermo TSQ Q1/Q3</b><br>Clozapine:<br>327/270.2<br>d <sub>4</sub> Clozapine:<br>331/272.0<br>Source Temp: 350 <sup>o</sup> C                         | <b>Agilent 1290 Series</b><br><b>Column:</b><br>ACQUITY UPLC HSS T32.1 x<br>50mm, 1.8 μm; Temp: 24 <sup>o</sup> C<br><b>Mobile Phase: A</b><br>10 mM Ammonium formate with<br>0.1% formic acid<br><b>Mobile Phase: B</b><br>Acetonitrile<br><b>Gradient Flow:</b> 0.5 mL/min<br>0 min: 90% A; 0.4 min: 90% A; 1.6<br>min: 60% A; 1.8 min: 10% A; 2.0<br>min: 10% A<br>2.2 min: 90% A; 3.0 min: 90% A<br><b>Autosampler Temp:</b> 5 <sup>o</sup> C<br>Injection Volume: 2 μL    | <b>Protein Precipitation</b><br>30 μl of plasma sample<br>was quenched with 100 μl<br>of acetonitrile containing<br>internal standard (200<br>ng/mL of Clozapine-d4).<br>The samples were<br>vortexed for 5 min,<br>followed by centrifugation<br>at 4000 rpm for 5 min.<br>Then add 30μL of 10mM<br>ammonium formate in<br>0.1% formic acid (Mobile<br>Phase A) to supernatant<br>and shake for one minute |
| <b>Cyclobenzaprine</b><br><b>Linearity:</b><br>1.0 to 1000<br>ng/mL | <b>Sciex 6500+ Q trap Q1/Q3</b><br>Cyclobenzaprine:<br>276.4/216.1<br>d <sub>3</sub> Cyclobenzaprine:<br>279.0/216.2<br>Source Temp: 500 <sup>o</sup> C | <b>Agilent 1290 Series</b><br><b>Column:</b><br>ACQUITY UPLC <sup>®</sup> HSS-T3, 1.8 μm<br>(2.1 x 500 mm); Temp: 24 <sup>o</sup> C<br><b>Mobile Phase: A</b><br>10 mM Ammonium formate with<br>0.1% formic acid<br><b>Mobile Phase: B</b><br>Acetonitrile<br><b>Gradient Flow:</b> 0.6 mL/min<br>0 min: 90% A; 0.4 min: 90% A; 0.6<br>min: 60% A; 1.6 min: 60% A; 1.8<br>min: 90% A<br>2.0 min: 90% A;<br><b>Autosampler Temp:</b> 5 <sup>o</sup> C<br>Injection Volume: 2 μL | <b>Protein Precipitation</b><br>30 μl of plasma sample<br>was quenched with 100 μl<br>of acetonitrile containing<br>internal standard (25<br>ng/mL of cyclobenzaprine-<br>d3). The samples were<br>vortexed for 5 min,<br>followed by centrifugation<br>at 4000 rpm for 5 min.                                                                                                                              |

|                                                           |                                                                                                                              |                                                                                                                                                                                                                                                                                                                                                                                                                         |                                                                                                                                                                                                                                                                                                                            |
|-----------------------------------------------------------|------------------------------------------------------------------------------------------------------------------------------|-------------------------------------------------------------------------------------------------------------------------------------------------------------------------------------------------------------------------------------------------------------------------------------------------------------------------------------------------------------------------------------------------------------------------|----------------------------------------------------------------------------------------------------------------------------------------------------------------------------------------------------------------------------------------------------------------------------------------------------------------------------|
|                                                           |                                                                                                                              |                                                                                                                                                                                                                                                                                                                                                                                                                         |                                                                                                                                                                                                                                                                                                                            |
| <p><b>Duloxetine Linearity:</b><br/>1.0 to 1000 ng/mL</p> | <p><b>Thermo TSQ Q1/Q3</b><br/>Duloxetine: 298.3/154<br/>d<sub>3</sub>Duloxetine: 301/157<br/>Source Temp: 350°C</p>         | <p><b>Agilent 1290 Series Column:</b><br/>Zorbax SB C18; 2.1x50 mm; 3.5 μm;<br/>Temp: 24°C<br/><b>Mobile Phase: A</b><br/>2 mM amm acetate with 0.1% formic acid<br/><b>Mobile Phase: B</b><br/>Acetonitrile<br/><b>Gradient Flow:</b> 0.5 mL/min<br/>0 min: 90% A; 0.4 min: 90% A; 0.6 min: 25% A; 1.6 min: 25% A; 1.8 min: 90% A<br/>2.0 min: 90% A;<br/><b>Autosampler Temp:</b> 5°C<br/>Injection Volume: 10 μL</p> | <p><b>Protein Precipitation</b><br/>30 μl of plasma sample was quenched with 100 μl of acetonitrile containing internal standard (100 ng/mL). The samples were vortexed for 5 min, followed by centrifugation at 4000 rpm for 5 min.</p>                                                                                   |
| <p><b>Mirtazapine Linearity:</b><br/>0.5 to 500 ng/mL</p> | <p><b>Thermo TSQ Q1/Q3</b><br/>Mirtazapine: 266.4/195.1<br/>d<sub>3</sub>Mirtazapine: 269.4/195.1<br/>Source Temp: 350°C</p> | <p><b>Agilent 1290 Series Column:</b><br/>Zorbax SB C18; 2.1x50 mm; 3.5 μm;<br/>Temp: 24°C<br/><b>Mobile Phase: A</b><br/>2 mM Ammonium formate with 0.1% formic acid<br/><b>Mobile Phase: B</b><br/>Acetonitrile<br/><b>Gradient Flow:</b> 0.5 mL/min<br/>0 min: 90% A; 0.4 min: 90% A; 1.6min: 40% A; 1.8 min: 90% A; 2.0 min: 90% A;<br/><b>Autosampler Temp:</b> 5°C<br/>Injection Volume: 2 μL</p>                 | <p>30 μl of plasma sample was quenched with 100 μl of acetonitrile containing internal standard (50 ng/mL). The samples were vortexed for 5 min, followed by centrifugation at 4000 rpm for 5 min. Then add 30μL of 10mM ammonium formate in 0.1% formic acid (Mobile Phase A) to supernatant and shake for one minute</p> |

|                                                                    |                                                                                                                                    |                                                                                                                                                                                                                                                                                                                                                                                                                                                         |                                                                                                                                                                                                                                                                                                                                                              |
|--------------------------------------------------------------------|------------------------------------------------------------------------------------------------------------------------------------|---------------------------------------------------------------------------------------------------------------------------------------------------------------------------------------------------------------------------------------------------------------------------------------------------------------------------------------------------------------------------------------------------------------------------------------------------------|--------------------------------------------------------------------------------------------------------------------------------------------------------------------------------------------------------------------------------------------------------------------------------------------------------------------------------------------------------------|
|                                                                    |                                                                                                                                    |                                                                                                                                                                                                                                                                                                                                                                                                                                                         |                                                                                                                                                                                                                                                                                                                                                              |
| <p><b>Paroxetine</b><br/><b>Linearity:</b><br/>1 to 1000 ng/mL</p> | <p><b>Thermo TSQ Q1/Q3</b><br/>Paroxetine:<br/>330.3/192.1<br/>d<sub>6</sub>Paroxetine:<br/>336/198<br/>Source Temp: 350°C</p>     | <p><b>Agilent 1290 Series</b><br/><b>Column:</b><br/>Zorbax SB C18; 2.1x50 mm; 3.5 μm;<br/>Temp: 24°C<br/><b>Mobile Phase: A</b><br/>2 mM ammonium acetate with 0.1% formic acid<br/><b>Mobile Phase: B</b><br/>Acetonitrile<br/><b>Gradient Flow:</b> 0.5 mL/min<br/>0 min: 90% A; 0.4 min: 90% A; 0.6 min: 25% A; 1.6 min: 25% A; 1.8 min: 90% A<br/>2.0 min: 90%A<br/><b>Autosampler Temp:</b> 5°C<br/>Injection Volume: 10 μL</p>                   | <p><b>Protein Precipitation</b><br/>30 μl of plasma sample was quenched with 100 μl of acetonitrile containing internal standard (200 ng/mL). The samples were vortexed for 5 min, followed by centrifugation at 4000 rpm for 5 min.</p>                                                                                                                     |
| <p><b>Quetiapine</b><br/><b>Linearity:</b><br/>4 to 2000 ng/mL</p> | <p><b>Thermo TSQ Q1/Q3</b><br/>Quetiapine:<br/>384.5/253.1<br/>d<sub>8</sub>Quetiapine:<br/>392.5/258.2<br/>Source Temp: 350°C</p> | <p><b>Agilent 1290 Series</b><br/><b>Column:</b><br/>ACQUITY UPLC HSS T32.1 x 50mm, 1.8 μm; Temp: 24°C<br/><b>Mobile Phase: A</b><br/>10 mM Ammonium formate with 0.1% formic acid<br/><b>Mobile Phase: B</b><br/>Acetonitrile<br/><b>Gradient Flow:</b> 0.5 mL/min<br/>0 min: 90% A; 0.4 min: 90% A; 1.6 min: 60% A; 1.8 min: 10% A; 2.0 min: 10% A<br/>2.2 min: 90% A; 3.0 min: 90% A<br/><b>Autosampler Temp:</b> 5°C<br/>Injection Volume: 2 μL</p> | <p><b>Protein Precipitation</b><br/>30 μl of plasma sample was quenched with 100 μl of acetonitrile containing internal standard (200 ng/mL). The samples were vortexed for 5 min, followed by centrifugation at 4000 rpm for 5 min. Then add 30μL of 10mM ammonium formate in 0.1% formic acid (Mobile Phase A) to supernatant and shake for one minute</p> |

|                                                                      |                                                                                                                                      |                                                                                                                                                                                                                                                                                                                                                                                                                                                                      |                                                                                                                                                                                                                                                                                                                                                              |
|----------------------------------------------------------------------|--------------------------------------------------------------------------------------------------------------------------------------|----------------------------------------------------------------------------------------------------------------------------------------------------------------------------------------------------------------------------------------------------------------------------------------------------------------------------------------------------------------------------------------------------------------------------------------------------------------------|--------------------------------------------------------------------------------------------------------------------------------------------------------------------------------------------------------------------------------------------------------------------------------------------------------------------------------------------------------------|
| <p><b>Ramelteon</b><br/><b>Linearity:</b><br/>4 to 2000 ng/mL</p>    | <p><b>Thermo TSQ Q1/Q3</b><br/>Ramelteon:<br/>260.2/204.1<br/>d<sub>3</sub>Ramelteon:<br/>263.2/204.1<br/>Source Temp: 350°C</p>     | <p><b>Agilent 1290 Series</b><br/><b>Column:</b><br/>ACQUITY UPLC HSS T32.1 x 50mm, 1.8 µm; Temp: 24°C<br/><b>Mobile Phase: A</b><br/>10 mM Ammonium formate with 0.1% formic acid<br/><b>Mobile Phase: B</b><br/>Acetonitrile<br/><b>Gradient Flow:</b> 0.5 mL/min<br/>0 min: 90% A; 0.4 min: 90% A; 1.6 min: 70% A; 1.8 min: 10% A; 2.0 min: 10% A<br/>2.2 min: 90% A; 3.0 min: 90% A; 4.0 min 90%<br/><b>Autosampler Temp:</b> 5°C<br/>Injection Volume: 1 µL</p> | <p><b>Protein Precipitation</b><br/>30 µl of plasma sample was quenched with 100 µl of acetonitrile containing internal standard (200 ng/mL). The samples were vortexed for 5 min, followed by centrifugation at 4000 rpm for 5 min. Then add 30µL of 10mM ammonium formate in 0.1% formic acid (Mobile Phase A) to supernatant and shake for one minute</p> |
| <p><b>Risperidone</b><br/><b>Linearity:</b><br/>0.5 to 500 ng/mL</p> | <p><b>Thermo TSQ Q1/Q3</b><br/>Risperidone:<br/>411.2/191.1<br/>d<sub>4</sub>Risperidone:<br/>415.2/195.2<br/>Source Temp: 350°C</p> | <p><b>Agilent 1290 Series</b><br/><b>Column:</b><br/>Zorbax SB C18; 2.1x50 mm; 3.5 µm;<br/>Temp: 24°C<br/><b>Mobile Phase: A</b><br/>2 mM Ammonium formate with 0.1% formic acid<br/><b>Mobile Phase: B</b><br/>Acetonitrile<br/><b>Gradient Flow:</b> 0.5 mL/min<br/>0 min: 90% A; 0.4 min: 90% A; 1.6 min: 40% A; 1.8 min: 90% A; 2.0 min: 90% A<br/><b>Autosampler Temp:</b> 5°C<br/>Injection Volume: 2 µL</p>                                                   | <p><b>Protein Precipitation</b><br/>30 µl of plasma sample was quenched with 100 µl of acetonitrile containing internal standard (5 ng/mL). The samples were vortexed for 5 min, followed by centrifugation at 4000 rpm for 5 min. Then add 30µL of 10mM ammonium formate in 0.1% formic acid (Mobile Phase A) to supernatant and shake for one minute</p>   |
| <p><b>Suvorexant</b><br/><b>Linearity:</b><br/>1 to 1000 ng/mL</p>   | <p><b>Thermo TSQ Q1/Q3</b><br/>Suvorexant:<br/>451.1/186<br/>d<sub>5</sub>Estazolam:<br/>300/272<br/>Source Temp: 350°C</p>          | <p><b>Agilent 1290 Series</b><br/><b>Column:</b><br/>ACQUITY UPLC HSS T32.1 x 50mm, 1.8 µm; Temp: 24°C<br/><b>Mobile Phase: A</b><br/>10 mM Ammonium formate with 0.1% formic acid<br/><b>Mobile Phase: B</b><br/>Acetonitrile<br/><b>Gradient Flow:</b> 0.5 mL/min<br/>0 min: 90% A; 0.4 min: 90% A; 0.6 min: 70% A; 1.2 min: 70% A; 1.4 min: 10% A</p>                                                                                                             | <p><b>Protein Precipitation</b><br/>30 µl of plasma sample was quenched with 100 µl of acetonitrile containing internal standard (1000 ng/mL). The samples were vortexed for 5 min, followed by centrifugation at 4000 rpm for 5 min. Then add 30µL of 10mM ammonium formate in 0.1% formic acid (Mobile Phase A) to supernatant</p>                         |

|                                                  |                                                                                                                               |                                                                                                                                                                                                                                                                                                                                                                                                                               |                                                                                                                                                                                                                                                                                                                                                       |
|--------------------------------------------------|-------------------------------------------------------------------------------------------------------------------------------|-------------------------------------------------------------------------------------------------------------------------------------------------------------------------------------------------------------------------------------------------------------------------------------------------------------------------------------------------------------------------------------------------------------------------------|-------------------------------------------------------------------------------------------------------------------------------------------------------------------------------------------------------------------------------------------------------------------------------------------------------------------------------------------------------|
|                                                  |                                                                                                                               | 2.0 min: 10% A; 2.2 min: 90% A; 2.5 min 90%; 3.5 min 90%<br><b>Autosampler Temp:</b> 5°C<br>Injection Volume: 1µl                                                                                                                                                                                                                                                                                                             | and shake for one minute                                                                                                                                                                                                                                                                                                                              |
| <b>Topiramate Linearity:</b><br>20 to 5000 ng/mL | <b>Sciex 6500+ Q trap Q1/Q3</b><br>Topiramate:<br>338/77.9<br>d <sub>12</sub> Topiramate:<br>350.0/78.1<br>Source Temp: 500°C | <b>Agilent 1290 Series Column:</b><br>Zorbax SB C18, 2.1*50mm, 3.5µ;<br>Temp: 24°C<br><b>Mobile Phase: A</b><br>10 mM Ammonium formate<br><b>Mobile Phase: B</b><br>Acetonitrile<br><b>Gradient Flow:</b> 0.5 mL/min<br>0 min: 90% A; 0.4 min: 90% A; 0.6 min: 70% A; 1.6 min: 70% A; 1.9 min: 20% A<br>2.2 min: 20% A; 2.3 min: 90% A; 2.5 min 90%<br><b>Autosampler Temp:</b> 5°C<br>Injection Volume: 2µl                  | <b>Protein Precipitation</b><br>30 µl of plasma sample was quenched with 100 µl of acetonitrile containing internal standard (1000 ng/mL). The samples were vortexed for 5 min, followed by centrifugation at 4000 rpm for 5 min. Then add 30µL of 10mM ammonium formate in 0.1% formic acid (Mobile Phase A) to supernatant and shake for one minute |
| <b>Trazodone Linearity:</b><br>3 to 3000 ng/mL   | <b>Thermo TSQ Q1/Q3</b><br>Trazodone:<br>372.2/176.2<br>d <sub>6</sub> Trazodone:<br>378.4/182.2<br>Source Temp: 350°C        | <b>Agilent 1290 Series Column:</b><br>ACQUITY UPLC HSS T32.1 x 50mm, 1.8 µm;<br>Temp: 24°C<br><b>Mobile Phase: A</b><br>10 mM Ammonium formate with 0.1% formic acid<br><b>Mobile Phase: B</b><br>Acetonitrile<br><b>Gradient Flow:</b> 0.5 mL/min<br>0 min: 90% A; 0.4 min: 90% A; 1.6 min: 70% A; 1.8 min: 70% A; 2.0 min: 10% A<br>2.2 min: 90% A; 3.0 min: 90% A<br><b>Autosampler Temp:</b> 5°C<br>Injection Volume: 2µl | <b>Protein Precipitation</b><br>30 µl of plasma sample was quenched with 100 µl of acetonitrile containing internal standard (200 ng/mL). The samples were vortexed for 5 min, followed by centrifugation at 4000 rpm for 5 min. Then add 30µL of 10mM ammonium formate in 0.1% formic acid (Mobile Phase A) to supernatant and shake for one minute  |

|                                                                    |                                                                                                                                              |                                                                                                                                                                                                                                                                                                                                                                                                                                                                        |                                                                                                                                                                                                                                                                                                                                                                                                                           |
|--------------------------------------------------------------------|----------------------------------------------------------------------------------------------------------------------------------------------|------------------------------------------------------------------------------------------------------------------------------------------------------------------------------------------------------------------------------------------------------------------------------------------------------------------------------------------------------------------------------------------------------------------------------------------------------------------------|---------------------------------------------------------------------------------------------------------------------------------------------------------------------------------------------------------------------------------------------------------------------------------------------------------------------------------------------------------------------------------------------------------------------------|
| <p><b>Zolpidem</b><br/> <b>Linearity:</b><br/> 1 to 1000 ng/mL</p> | <p><b>Thermo TSQ Q1/Q3</b><br/> Zolpidem:<br/> 308.2/176.2<br/> d<sub>6</sub>Zolpidem:<br/> 314/176.2<br/> Source Temp: 350<sup>o</sup>C</p> | <p><b>Agilent 1290 Series</b><br/> <b>Column:</b><br/> ACQUITY UPLC HSS T32.1 x<br/> 50mm, 1.8 μm;<br/> Temp: 24<sup>o</sup>C<br/> <b>Mobile Phase: A</b><br/> HSS TX3<br/> <b>Mobile Phase: B</b><br/> Acetonitrile<br/> <b>Gradient Flow:</b> 0.6 mL/min<br/> 0 min: 90% A; 0.4 min: 90% A; 1.0<br/> min: 60% A; 1.5 min: 60% A; 1.6<br/> min: 90% A<br/> 2.0 min: 90% A; 2.5 min: 90% A<br/> <b>Autosampler Temp:</b> 5<sup>o</sup>C<br/> Injection Volume: 1μl</p> | <p><b>Protein Precipitation</b><br/> 30 μl of plasma sample<br/> was quenched with 100 μl<br/> of acetonitrile containing<br/> internal standard (200<br/> ng/mL). The samples were<br/> vortexed for 5 min,<br/> followed by centrifugation<br/> at 4000 rpm for 5 min.<br/> Then add 30μL of 10mM<br/> ammonium formate in<br/> 0.1% formic acid (Mobile<br/> Phase A) to supernatant<br/> and shake for one minute</p> |
|--------------------------------------------------------------------|----------------------------------------------------------------------------------------------------------------------------------------------|------------------------------------------------------------------------------------------------------------------------------------------------------------------------------------------------------------------------------------------------------------------------------------------------------------------------------------------------------------------------------------------------------------------------------------------------------------------------|---------------------------------------------------------------------------------------------------------------------------------------------------------------------------------------------------------------------------------------------------------------------------------------------------------------------------------------------------------------------------------------------------------------------------|



**Table S3: Pharmacokinetic parameters of single dose, single drug administration**

| Drug            | Dose (mg/kg) | T <sub>max</sub> (h) | C <sub>max</sub> (ng/mL) | AUC <sub>0-t</sub> (h×ng/mL) |
|-----------------|--------------|----------------------|--------------------------|------------------------------|
| Oxycodone       | 6.25 (n=6)   | 0.5 ± 0.4            | 7.0 ± 2.2                | 11.7 ± 3.6                   |
|                 | 60 (n=11)    | 0.9 ± 0.6            | 29.7 ± 12.6              | 89.0 ± 21.5                  |
|                 | 150 (n=10)   | 0.9 ± 0.6            | 48.3 ± 14.7              | 145.4 ± 55.7                 |
|                 | 300 (n=6)    | 0.8 ± 0.4            | 61.2 ± 40.2              | 201.3 ± 161.2                |
| Diazepam        | 2 (n=6)      | 0.5 ± 0.3            | 22.6 ± 22.9              | 49.3 ± 64.3                  |
|                 | 20 (n=6)     | 0.3 ± 0.1            | 286.5 ± 147.9            | 621.9 ± 388.9                |
|                 | 200 (n=6)    | 2.2 ± 0.4            | 1370.9 ± 505.3           | 6771.9 ± 2770.8              |
| Clozapine       | 5 (n=6)      | 0.9 ± 0.6            | 19.5 ± 12.2              | 28.6 ± 17.6                  |
|                 | 25 (n=6)     | 1.0 ± 0.8            | 65.3 ± 20.8              | 148.2 ± 65.5                 |
|                 | 125 (n=6)    | 0.6 ± 0.2            | 653.9 ± 309.4            | 1637.5 ± 600.2               |
| Cyclobenzaprine | 3 (n=6)      | *                    | *                        | *                            |
|                 | 30 (n=6)     | 0.9 ± 0.2            | 6.4 ± 2.3                | 22.0 ± 7.3                   |
|                 | 300 (n=6)    | 3.9 ± 3.9            | 86.1 ± 36.5              | 438.8 ± 156.9                |
| Duloxetine      | 5 (n=6)      | 2.3 ± 1.0            | 10.6 ± 2.8               | 47.2 ± 16.5                  |
|                 | 50 (n=6)     | 2.0 ± 0.9            | 465.1 ± 135.3            | 2514.8 ± 787.8               |
|                 | 250 (n=6)    | 4.3 ± 1.9            | 1235.1 ± 997.5           | 8195.1 ± 6549.5              |
| Mirtazapine     | 5 (n=5)      | 1.0 ± 1.2            | 18.1 ± 7.6               | 46.9 ± 16.5                  |
|                 | 50 (n=6)     | 1.8 ± 3.1            | 87.5 ± 59.4              | 317.4 ± 105.6                |
|                 | 250 (n=6)    | 0.4 ± 0.3            | 204.7 ± 42.9             | 611.6 ± 164.4                |
| Paroxetine      | 5 (n=4)      | 4.5 ± 2.4            | 58.9 ± 29.3              | 315.5 ± 175.4                |
|                 | 50 (n=6)     | 5.3 ± 2.9            | 1090.0 ± 245.6           | 6854.1 ± 1956.7              |
|                 | 250 (n=4)    | 6.5 ± 3.0            | 1775.0 ± 160.4           | 11407.3 ± 1507.0             |
| Quetiapine      | 25 (n=6)     | 1.0 ± 0.5            | 46.3 ± 44.3              | 107.3 ± 118.6                |
|                 | 250 (n=6)    | 5.6 ± 3.2            | 512.3 ± 222.4            | 2707.3 ± 1532.2              |
|                 | 1250 (n=6)   | 3.1 ± 3.2            | 1212.6 ± 1089.8          | 4917.4 ± 2131.7              |
| Ramelteon       | 3 (n=6)      | 0.3 ± 0.1            | 68.9 ± 24.1              | 112.5 ± 33.6                 |
|                 | 30 (n=6)     | 0.4 ± 0.1            | 768.2 ± 252.1            | 1527.7 ± 459.6               |
|                 | 300 (n=6)    | 2.7 ± 1.3            | 5904.0 ± 1680.8          | 31479.3 ± 10385.1            |
| Risperidone     | 2 (n=6)      | 1.1 ± 0.7            | 48.4 ± 15.7              | 134.8 ± 33.6                 |
|                 | 10 (n=6)     | 0.7 ± 0.6            | 108.5 ± 48.8             | 350.0 ± 105.6                |
|                 | 50 (n=6)     | 5.2 ± 3.7            | 508.8 ± 325.1            | 2063.4 ± 1133.7              |
| Suvorexant      | 6 (n=6)      | 3.3 ± 1.5            | 122.2 ± 26.9             | 544.2 ± 117.1                |
|                 | 60 (n=6)     | 5.7 ± 0.8            | 2534.9 ± 2177.5          | 14308.8 ± 12618.7            |
|                 | 300 (n=5)    | 7.6 ± 0.9            | 4616.2 ± 3011.2          | 23711.3 ± 16209.9            |
| Topiramate      | 20 (n=6)     | 1.5 ± 0.5            | 8830.3 ± 2146.7          | 39303.6 ± 8295.4             |
|                 | 200 (n=6)    | 1.3 ± 0.9            | 72835.1 ± 35373.7        | 321792.7 ± 119677.5          |
|                 | 1000 (n=5)   | 1.2 ± 0.4            | 164106.6 ± 67883.9       | 897417.2 ± 362698.2          |
| Trazadone       | 20 (n=6)     | 0.8 ± 1.1            | 237.8 ± 127.4            | 582.2 ± 155.9                |
|                 | 100 (n=6)    | 0.9 ± 1.5            | 991.1 ± 650.6            | 2632.7 ± 498.7               |
|                 | 500 (n=6)    | 2.5 ± 3.5            | 3664.2 ± 3160.4          | 12224.9 ± 5251.2             |
| Zolpidem        | 5 (n=6)      | 0.3 ± 0.1            | 115.9 ± 62.7             | 285.9 ± 92.4                 |
|                 | 50 (n=6)     | 0.6 ± 0.7            | 1243.4 ± 889.5           | 2979.1 ± 993.5               |
|                 | 500 (n=6)    | 1.5 ± 3.2            | 12259.8 ± 7462.9         | 44488.9 ± 48913.3            |
| Carisoprodol    | 5 (n=5)      | 0.3 ± 0.1            | 10.9 ± 7.6               | 15.4 ± 8.5                   |
|                 | 50 (n=6)     | 0.7 ± 0.7            | 95.0 ± 65.7              | 203.8 ± 87.3                 |
|                 | 250 (n=5)    | 0.5 ± 0.2            | 3178.5 ± 3134.2          | 5003.4 ± 3573.4              |

**Table S4: Single Drug  $t_{max}$  and dose timing for combination experiments**

| Single Drug Study<br>Drug and Dose | $t_{max}$<br>(minutes) | Combination Drug Sequence and Intervals |                          |              |
|------------------------------------|------------------------|-----------------------------------------|--------------------------|--------------|
|                                    |                        | First Drug<br>(time zero)               | Interval<br>(in minutes) | Second Drug  |
| Oxycodone 150 mg/kg                | 60                     |                                         |                          |              |
| Paroxetine 50 mg/kg                | 180                    | Paroxetine                              | 180                      | Oxycodone    |
| Paroxetine 5 mg/kg                 | 240                    |                                         |                          |              |
| Risperidone 10 mg/kg               | 30                     | Oxycodone                               | 30                       | Risperidone  |
| Cyclobenzaprine 30 mg/kg           | 60                     | Cyclobenzaprine                         | 30                       | Oxycodone    |
| Mirtazapine 50 mg/kg               | 30                     | Mirtazapine                             | 0                        | Oxycodone    |
| Zolpidem 50 mg/kg                  | 15                     | Oxycodone                               | 30                       | Zolpidem     |
| Duloxetine 50 mg/kg                | 180                    | Duloxetine                              | 180                      | Oxycodone    |
| Clozapine 25 mg/kg                 | 30                     | Clozapine                               | 0                        | Oxycodone    |
| Quetiapine 250 mg/kg               | 60                     |                                         |                          |              |
| Quetiapine 25 mg/kg                | 60                     | Quetiapine                              | 0                        | Oxycodone    |
| Trazodone 100 mg/kg                | 15                     | Oxycodone                               | 30                       | Trazodone    |
| Topiramate 20 mg/kg                | 60                     | Topiramate                              | 0                        | Oxycodone    |
| Carisoprodol 50 mg/kg              | 15                     | Oxycodone                               | 30                       | Carisoprodol |
| Ramelteon 30 mg/kg                 | 30                     | Oxycodone                               | 30                       | Ramelteon    |
| Suvorexant 60 mg/kg                | 360                    | Suvorexant                              | 180                      | Oxycodone    |

**Table S5: Pharmacokinetic parameters of the drugs upon Coadministration**

| Drug              |                              | Dose (mg/kg) | T <sub>max</sub> (h) | C <sub>max</sub> (ng/mL) | AUC <sub>0-t</sub> (h.ng/mL) |
|-------------------|------------------------------|--------------|----------------------|--------------------------|------------------------------|
| Diazepam          | Oxycodone (Alone) n=17       | 150          | 1.1 ± 0.8            | 51.2 ± 28.3              | 95.1 ± 51.9                  |
|                   | Oxycodone (Combo) n=18       | 150          | 1.3 ± 0.9            | 102.3 ± 75.6             | 202.8 ± 135.6                |
|                   | Diazepam (Alone) n=6         | 20           | 0.3 ± 0.1            | 286.5 ± 148.0            | 367.4 ± 190.2                |
|                   | Diazepam (Combo) n=18        | 20           | 0.8 ± 0.9            | 134.4 ± 144.7            | 247.9 ± 239.0                |
| Diazepam Repeat   | Oxycodone (Alone) n=6        | 6.25         | 0.4 ± 0.1            | 6.7 ± 3.4                | 10.1 ± 5.1                   |
|                   | Oxycodone (Combo) n=6        | 6.25         | 0.5 ± 0.7            | 5.4 ± 3.6                | 7.3 ± 2.9                    |
|                   | Diazepam (Alone) n=6         | 20           | 0.3 ± 0.1            | 286.5 ± 148.0            | 367.4 ± 190.2                |
|                   | Diazepam (Combo) n=6         | 20           | 1.2 ± 1.1            | 124.0 ± 67.3             | 226.5 ± 119.8                |
| Clozapine         | Oxycodone (Alone) n=6        | 150          | 0.9 ± 1.1            | 45.7 ± 13.9              | 72.1 ± 31.1                  |
|                   | Oxycodone (Combo) n=6        | 150          | 1.2 ± 0.4            | 36.5 ± 17.4              | 64.9 ± 31.9                  |
|                   | Clozapine (Alone) n=6        | 25           | 1.0 ± 0.8            | 65.3 ± 20.8              | 99.5 ± 37.7                  |
|                   | Clozapine (Combo) n=6        | 25           | 1.0 ± 0.0            | 9.6 ± 9.1                | 15.9 ± 14.8                  |
| Cyclobenzaprine   | Oxycodone (Alone) n=12       | 150          | 1.6 ± 1.1            | 61.0 ± 40.8              | 98.2 ± 64.7                  |
|                   | Oxycodone (Combo) n=11       | 150          | 1.3 ± 1.0            | 103.6 ± 80.9             | 195.3 ± 160.9                |
|                   | Cyclobenzaprine (Alone) n=6  | 30           | 0.9 ± 0.2            | 6.4 ± 2.4                | 14.1 ± 5.1                   |
|                   | Cyclobenzaprine (Combo) n=11 | 30           | 0.8 ± 0.0            | 9.3 ± 4.6                | 18.4 ± 9.0                   |
| Duloxetine        | Oxycodone (Alone) n=6        | 150          | 0.5 ± 0.3            | 76.9 ± 30.5              | 105.0 ± 41.8                 |
|                   | Oxycodone (Combo) n=4        | 150          | 1.0 ± 1.2            | 181.5 ± 105.5            | 326.0 ± 172.8                |
|                   | Duloxetine (Alone) n=6       | 50           | 2.0 ± 0.9            | 465.1 ± 135.3            | 1969.1 ± 720.1               |
|                   | Duloxetine (Combo) n=4       | 50           | 3.3 ± 0.0            | 325.9 ± 52.7             | 1149.3 ± 222.5               |
| Mirtazapine       | Oxycodone (Alone) n=6        | 150          | 0.9 ± 0.2            | 52.5 ± 23.2              | 79.9 ± 21.4                  |
|                   | Oxycodone (Combo) n=6        | 150          | 0.8 ± 0.4            | 52.3 ± 43.4              | 96.2 ± 95.5                  |
|                   | Mirtazapine (Alone) n=6      | 50           | 1.8 ± 3.1            | 87.5 ± 59.4              | 156.4 ± 83.7                 |
|                   | Mirtazapine (Combo) n=6      | 50           | 1.3 ± 0.6            | 70.0 ± 38.1              | 134.9 ± 89.2                 |
| Paroxetine        | Oxycodone (Alone) n=6        | 150          | 0.6 ± 0.3            | 33.1 ± 12.4              | 55.5 ± 14.5                  |
|                   | Oxycodone (Combo) n=6        | 150          | 0.6 ± 0.7            | 205.3 ± 182.7            | 253.5 ± 137.6                |
|                   | Paroxetine (Alone) n=6       | 50           | 5.3 ± 2.9            | 1090.0 ± 245.6           | 4840.4 ± 1610.3              |
|                   | Paroxetine (Combo) n=6       | 50           | 3.8 ± 1.1            | 554.5 ± 133.1            | 2276.7 ± 610.9               |
| Paroxetine Repeat | Oxycodone (Alone) n=6        | 150          | 0.6 ± 0.3            | 50.3 ± 5.9               | 74.3 ± 13.6                  |
|                   | Oxycodone (Combo) n=6        | 150          | 0.8 ± 0.3            | 69.6 ± 32.6              | 117.3 ± 64.0                 |
|                   | Paroxetine (Alone) n=4       | 5            | 4.5 ± 2.4            | 58.9 ± 29.3              | 221.2 ± 124.3                |
|                   | Paroxetine (Combo) n=6       | 5            | 3.3 ± 0.1            | 14.8 ± 16.0              | 55.6 ± 62.1                  |
| Quetiapine        | Oxycodone (Alone) n=6        | 150          | 0.5 ± 0.2            | 27.6 ± 13.0              | 54.0 ± 25.6                  |
|                   | Oxycodone (Combo) n=5        | 150          | 1.3 ± 1.0            | 304.6 ± 165.2            | 421.3 ± 196.6                |
|                   | Quetiapine (Alone) n=6       | 250          | 5.6 ± 3.2            | 512.3 ± 222.4            | 882.9 ± 607.3                |
|                   | Quetiapine (Combo) n=5       | 250          | 1.3 ± 1.0            | 230.0 ± 125.0            | 334.4 ± 194.6                |
| Quetiapine Repeat | Oxycodone (Alone) n=6        | 150          | 0.5 ± 0.1            | 29.7 ± 13.0              | 49.5 ± 23.3                  |
|                   | Oxycodone (Combo) n=6        | 150          | 1.2 ± 0.9            | 57.1 ± 39.8              | 89.8 ± 63.9                  |
|                   | Quetiapine (Alone) n=6       | 25           | 1.0 ± 0.5            | 46.3 ± 44.3              | 78.1 ± 80.7                  |
|                   | Quetiapine (Combo) n=6       | 25           | 1.0 ± 0.6            | 7.1 ± 4.7                | 6.5 ± 5.3                    |
| Ramelteon         | Oxycodone (Alone) n=11       | 150          | 0.8 ± 0.6            | 66.8 ± 57.5              | 94.0 ± 62.1                  |
|                   | Oxycodone (Combo) n=12       | 150          | 1.5 ± 1.1            | 97.0 ± 70.2              | 177.6 ± 111.1                |
|                   | Ramelteon (Alone) n=6        | 30           | 0.4 ± 0.1            | 768.2 ± 252.1            | 1029.2 ± 289.1               |
|                   | Ramelteon (Combo) n=12       | 30           | 0.5 ± 0.8            | 434.5 ± 217.0            | 442.9 ± 226.2                |
| Risperidone       | Oxycodone (Alone) n=4        | 150          | 0.6 ± 0.3            | 61.8 ± 14.9              | 98.8 ± 14.6                  |
|                   | Oxycodone (Combo) n=6        | 150          | 1.3 ± 0.3            | 54.1 ± 33.6              | 121.5 ± 68.3                 |

|              |                          |     |           |                 |                  |
|--------------|--------------------------|-----|-----------|-----------------|------------------|
|              | Risperidone (Alone) n=6  | 10  | 0.7 ± 0.6 | 108.5 ± 48.8    | 216.4 ± 74.5     |
|              | Risperidone (Combo) n=6  | 10  | 0.8 ± 0.3 | 92.4 ± 47.8     | 167.3 ± 88.4     |
| Suvorexant   | Oxycodone (Alone) n=6    | 150 | 0.6 ± 0.2 | 128.0 ± 107.1   | 186.2 ± 137.7    |
|              | Oxycodone (Combo) n=6    | 150 | 1.5 ± 1.2 | 122.5 ± 53.8    | 230.9 ± 124.4    |
|              | Suvorexant (Alone) n=6   | 60  | 5.7 ± 0.8 | 2534.9 ± 2177.5 | 9848.3 ± 8683.8  |
|              | Suvorexant (Combo) n=6   | 60  | 3.4 ± 0.3 | 1016.9 ± 400.9  | 3379.5 ± 1339.4  |
| Topiramate   | Oxycodone (Alone) n=12   | 150 | 0.6 ± 0.5 | 58.5 ± 42.7     | 89.8 ± 71.9      |
|              | Oxycodone (Combo) n=12   | 150 | 1.4 ± 1.1 | 96.0 ± 128.2    | 151.1 ± 143.9    |
|              | Topiramate (Alone) n=6   | 20  | 1.5 ± 0.5 | 8830.3 ± 2146.7 | 19984.7 ± 4566.3 |
|              | Topiramate (Combo) n=12  | 20  | 1.8 ± 0.9 | 2435.1 ± 1729.3 | 5299.7 ± 3572.7  |
| Trazadone    | Oxycodone (Alone) n=12   | 150 | 1.2 ± 1.0 | 72.8 ± 80.4     | 102.2 ± 90.4     |
|              | Oxycodone (Combo) n=11   | 150 | 1.3 ± 0.8 | 73.3 ± 67.8     | 146.3 ± 154.0    |
|              | Trazadone (Alone) n=6    | 100 | 0.9 ± 1.5 | 991.1 ± 650.6   | 1423.6 ± 474.8   |
|              | Trazadone (Combo) n=11   | 100 | 0.5 ± 0.2 | 180.8 ± 175.9   | 317.2 ± 414.4    |
| Zolpidem     | Oxycodone (Alone) n=6    | 150 | 1.4 ± 1.2 | 162.4 ± 183.3   | 205.7 ± 228.3    |
|              | Oxycodone (Combo) n=5    | 150 | 1.4 ± 1.2 | 120.3 ± 150.0   | 181.9 ± 171.4    |
|              | Zolpidem (Alone) n=6     | 100 | 0.5 ± 0.7 | 1243.4 ± 889.5  | 1590.2 ± 1163.3  |
|              | Zolpidem (Combo) n=5     | 100 | 1.0 ± 0.6 | 548.0 ± 462.7   | 760.2 ± 549.3    |
| Carisoprodol | Oxycodone (Alone) n=6    | 150 | 0.7 ± 0.3 | 44.6 ± 20.2     | 96.6 ± 52.0      |
|              | Oxycodone (Combo) n=6    | 150 | 0.8 ± 0.1 | 121.8 ± 128.2   | 169.7 ± 134.8    |
|              | Carisoprodol (Alone) n=6 | 50  | 0.7 ± 0.7 | 95.0 ± 65.7     | 148.2 ± 88.4     |
|              | Carisoprodol (Combo) n=6 | 50  | 0.8 ± 1.1 | 167.8 ± 234.8   | 127.8 ± 139.2    |

\*Not reportable due to concentrations below the lower limit of quantitation of the analytical method

Figure S1: pCO<sub>2</sub> & pO<sub>2</sub> from individual SPD drug treatments and combination treatments with oxycodone

Carisoprodol

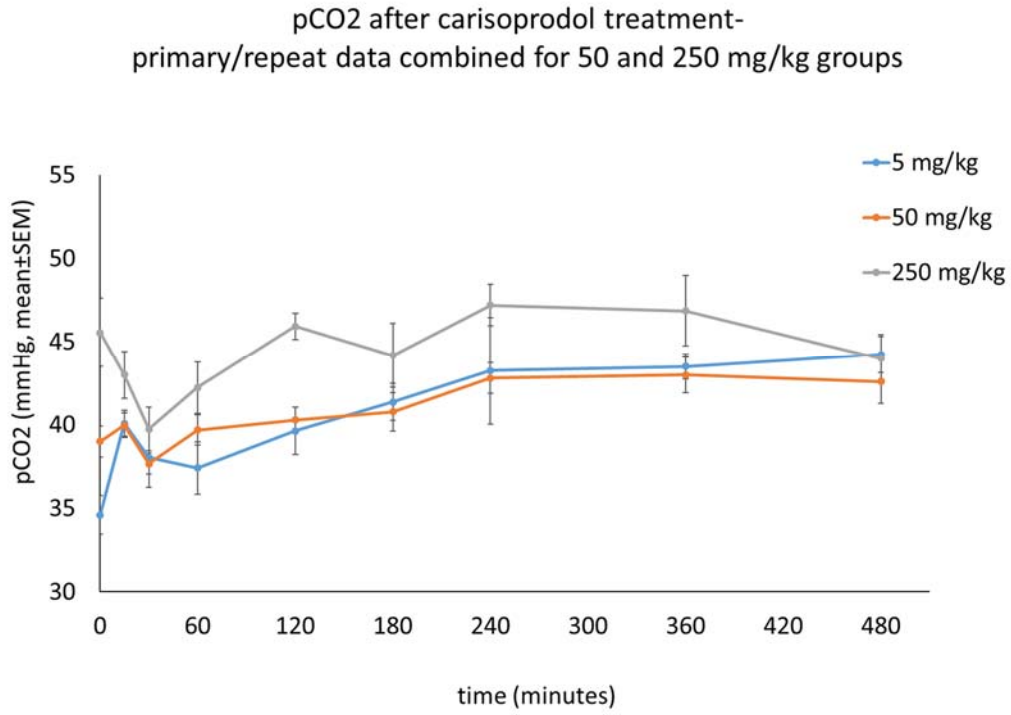

pO2 after carisoprodol treatment-  
primary/repeat data combined for 50 and 250 mg/kg groups

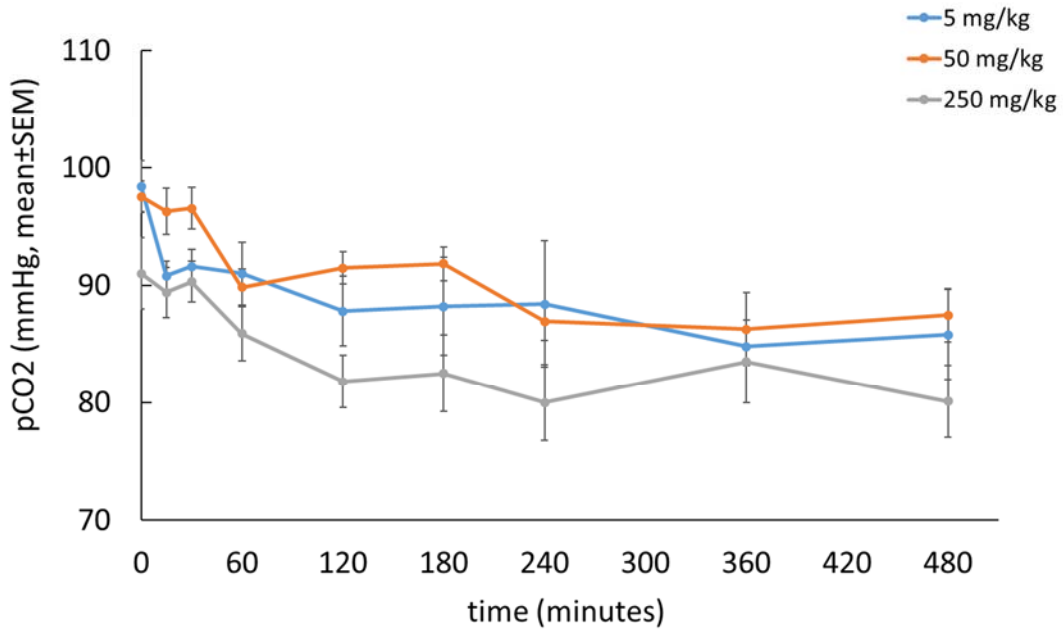

Blood pCO2 after oxycodone 150 mg/kg alone or  
carisoprodol 50 mg/kg + oxycodone 150 mg/kg

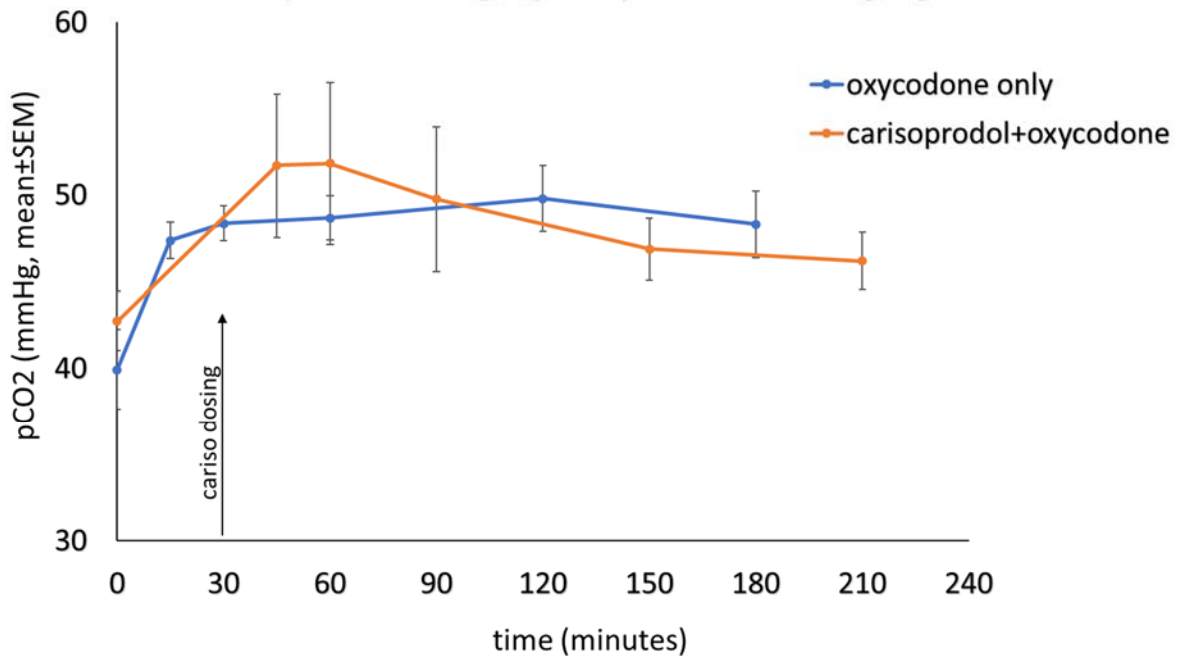

Blood pO2 after oxycodone 150 mg/kg alone or carisoprodol 50 mg/kg + oxycodone 150 mg/kg

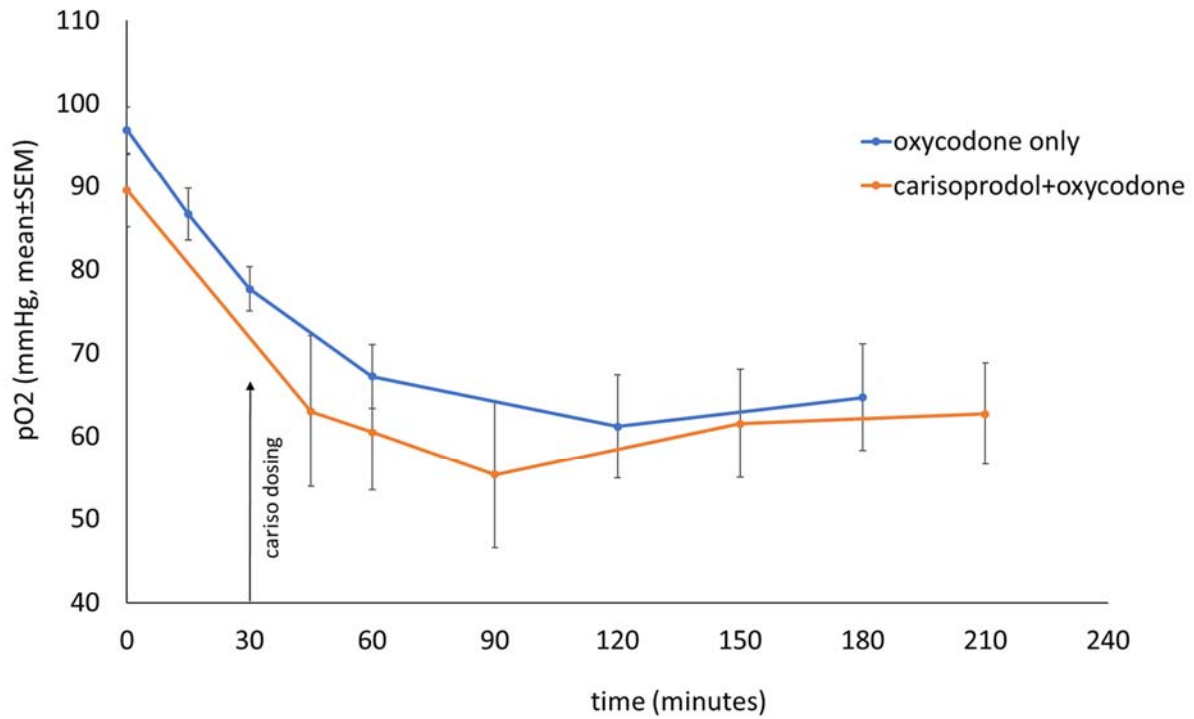

Clozapine

Blood pCO2 after Oral Clozapine Dosing

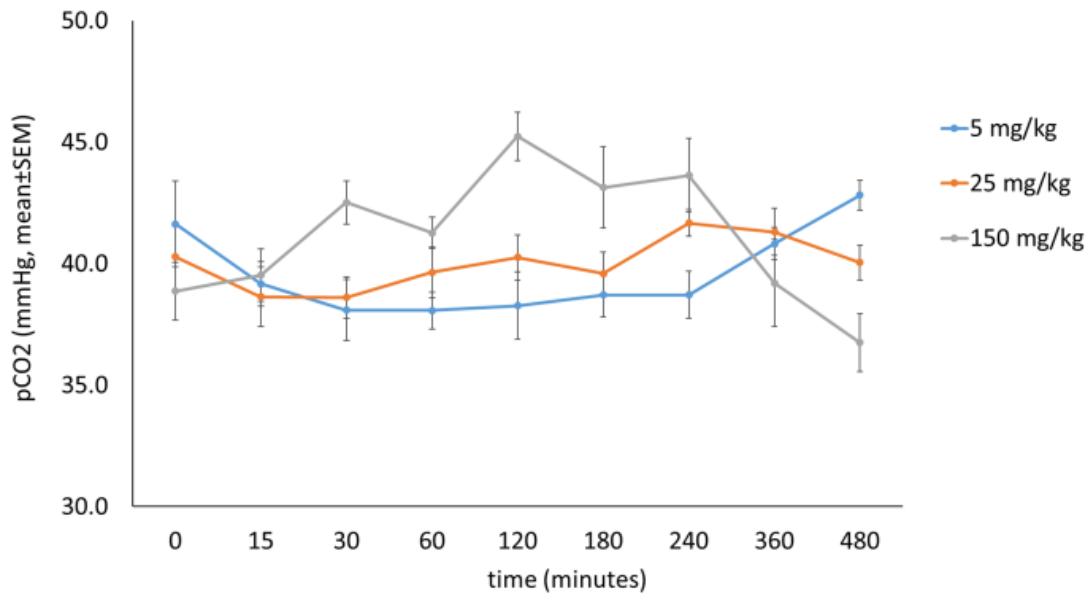

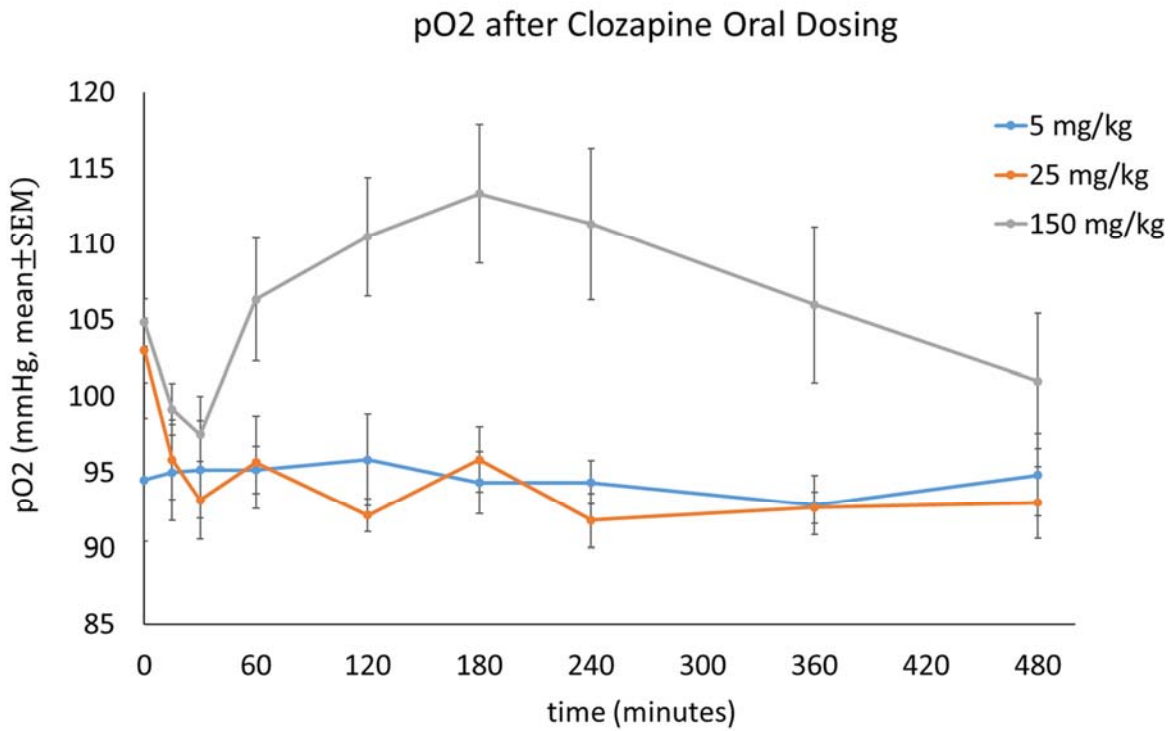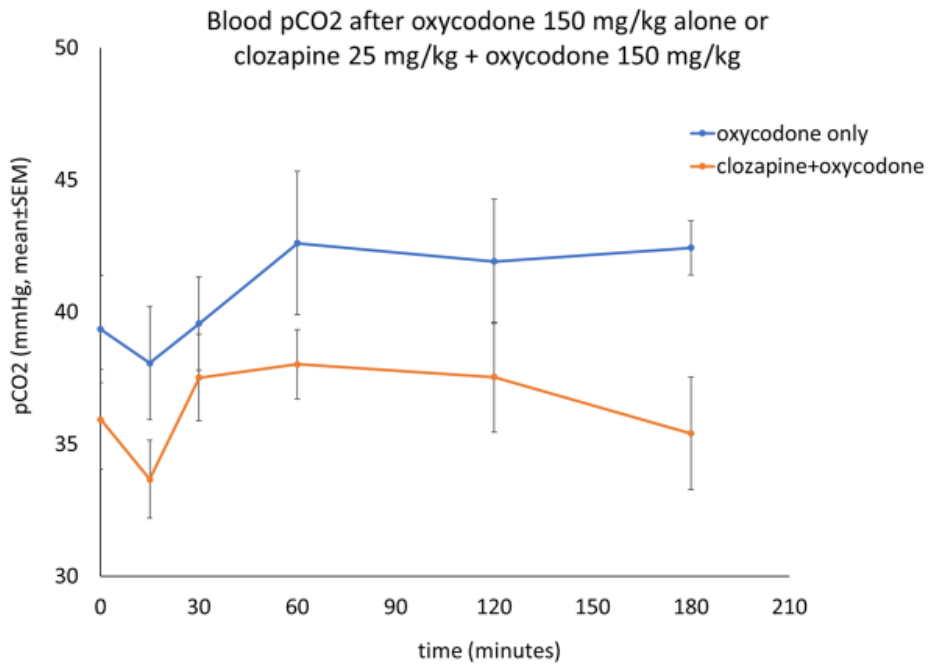



Blood pO<sub>2</sub> after oxycodone 150 mg/kg alone or clozapine 25 mg/kg + oxycodone 150 mg/kg

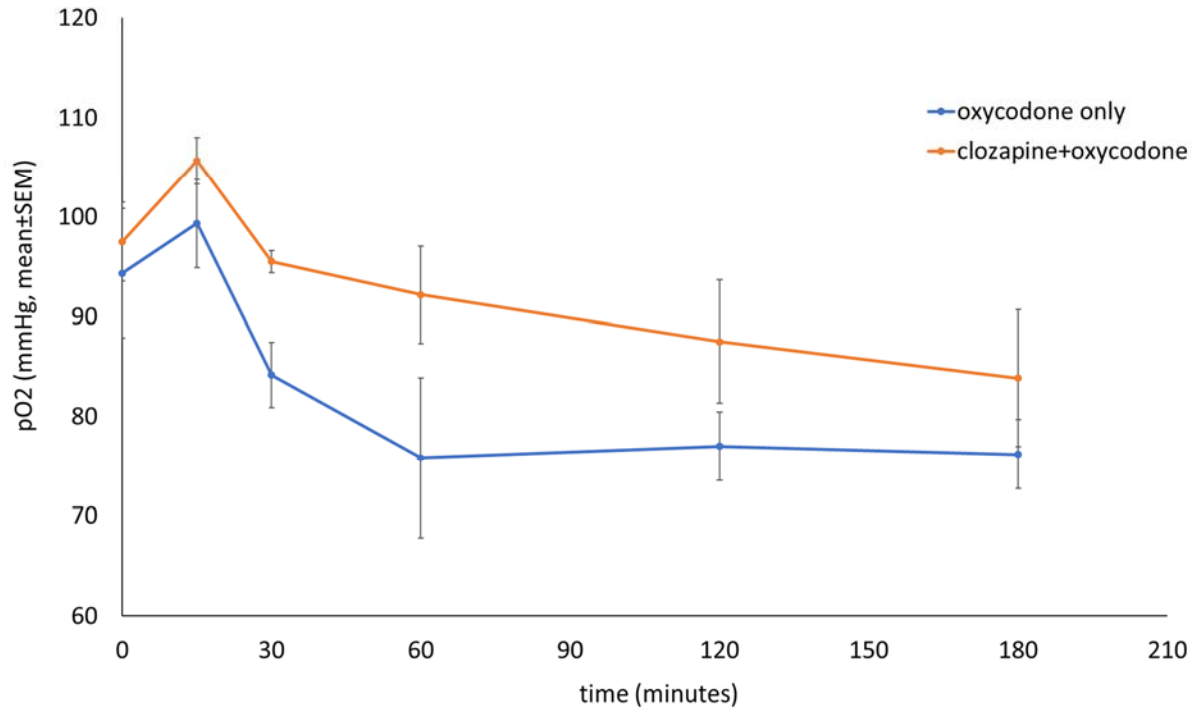

Cyclobenzaprine

Blood pCO<sub>2</sub> after Oral Cyclobenzaprine Dosing

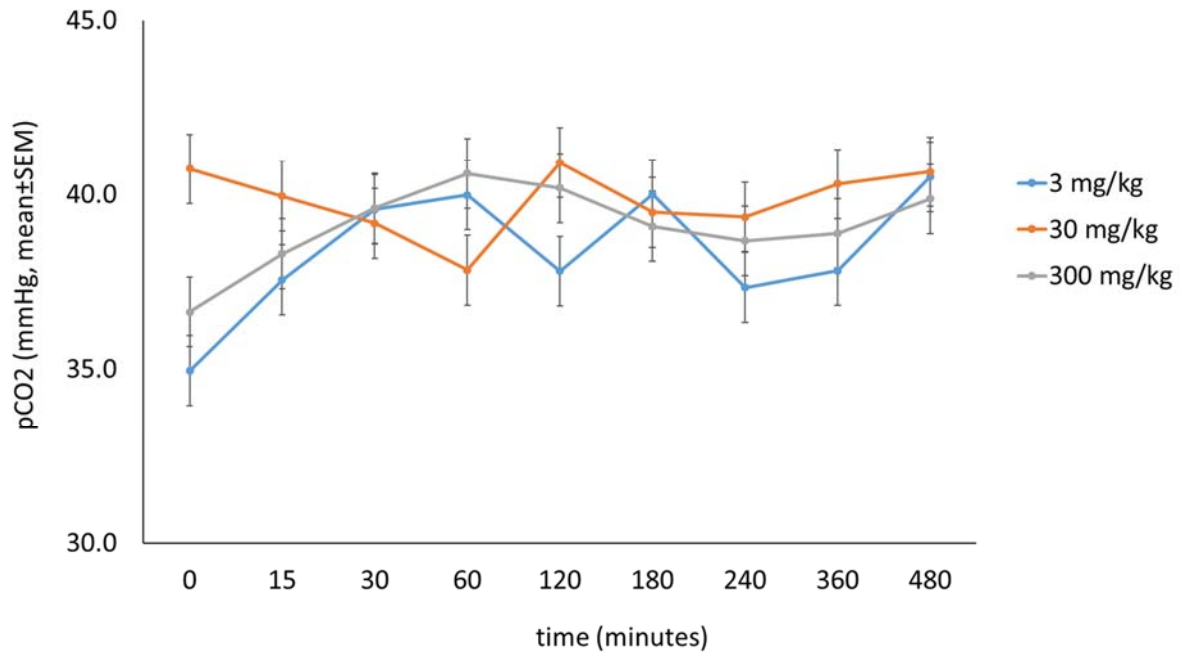

pO<sub>2</sub> after Cyclobenzaprine Oral Dosing

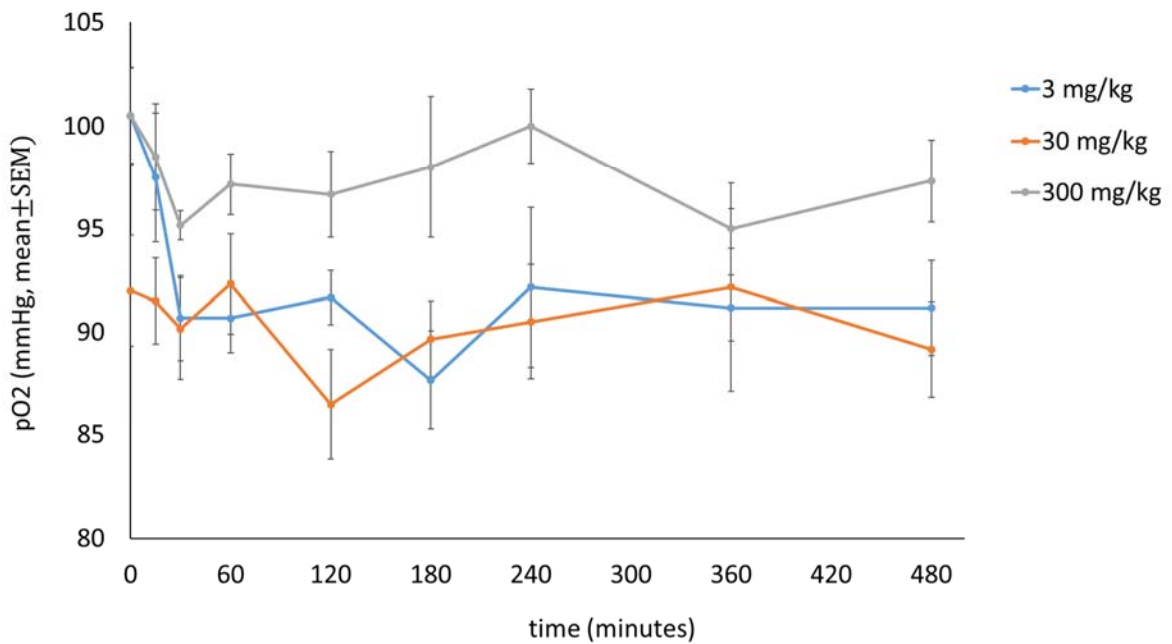

blood pCO<sub>2</sub> after oxycodone 150 mg/kg + cyclobenzaprine 30 mg/kg-  
primary/repeat study data combined

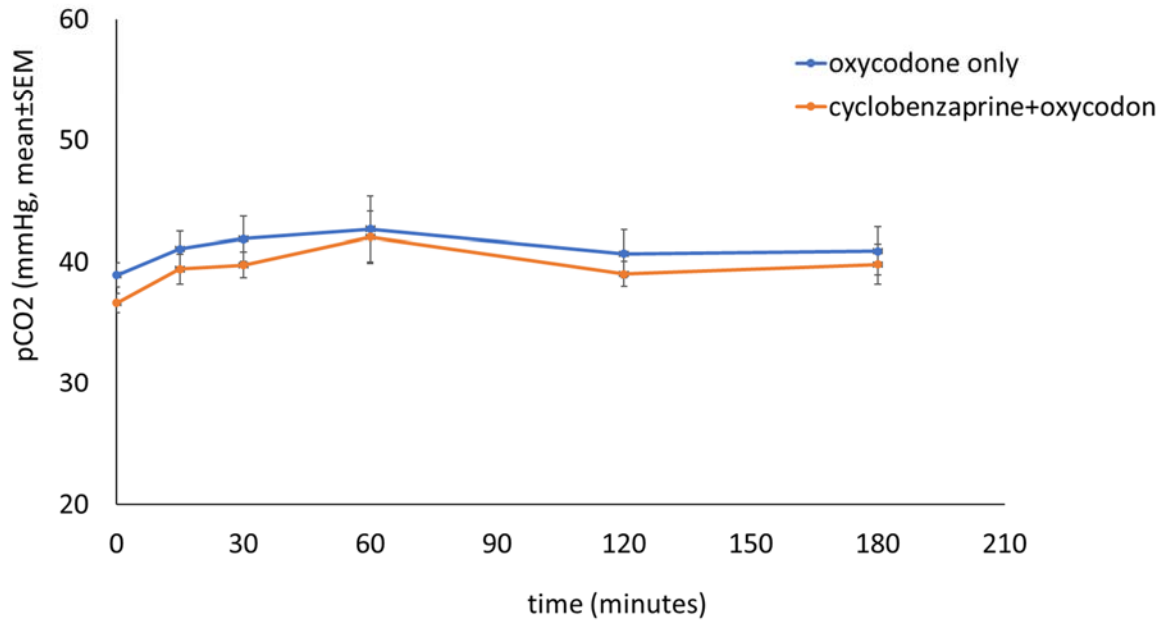

pO<sub>2</sub> after oxy 150 mg/kg + cyclobenzaprine 30 mg/kg-  
primary/repeat study data combined

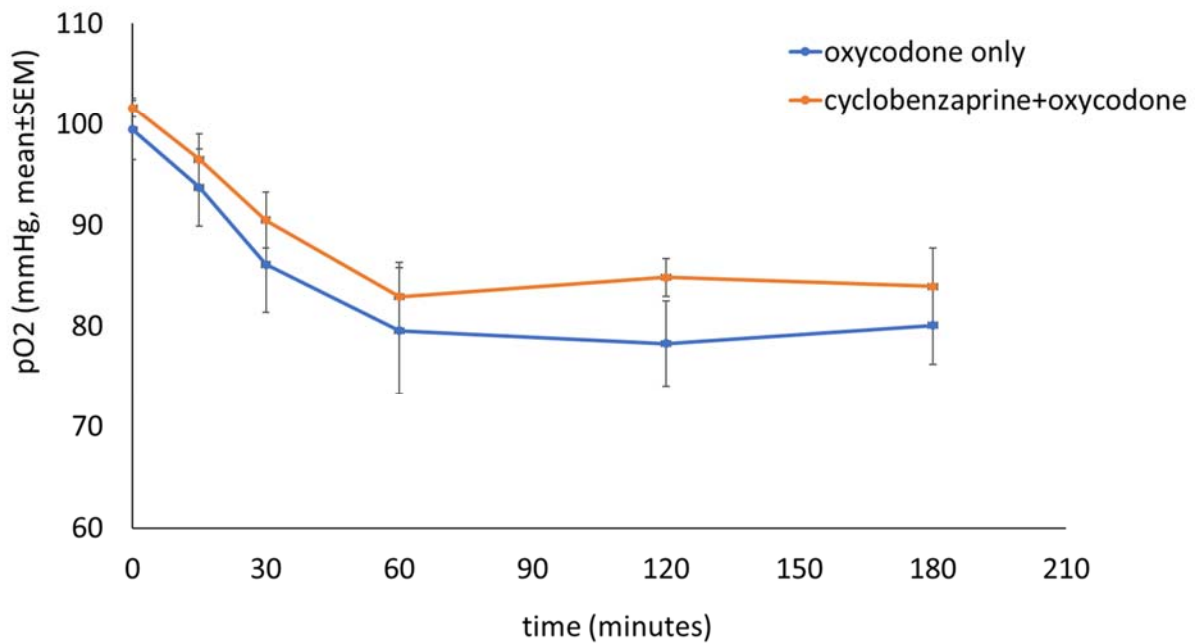

Duloxetine

Blood pCO2 after Oral Duloxetine Dosing

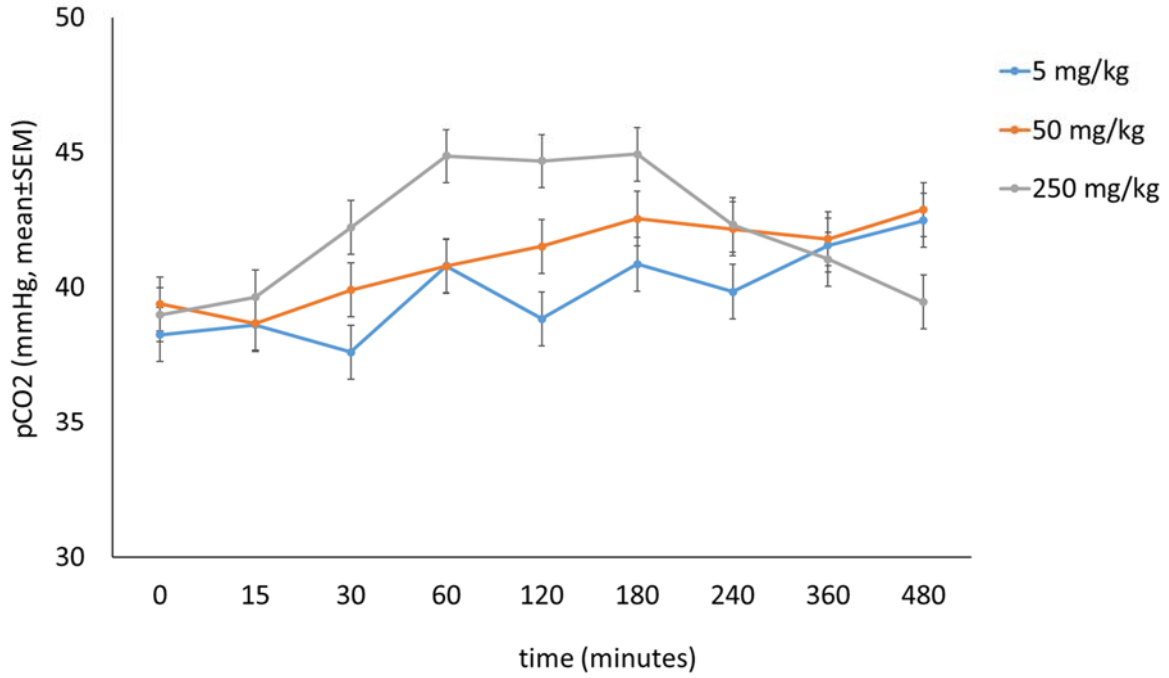

pO2 after Duloxetine Oral Dosing

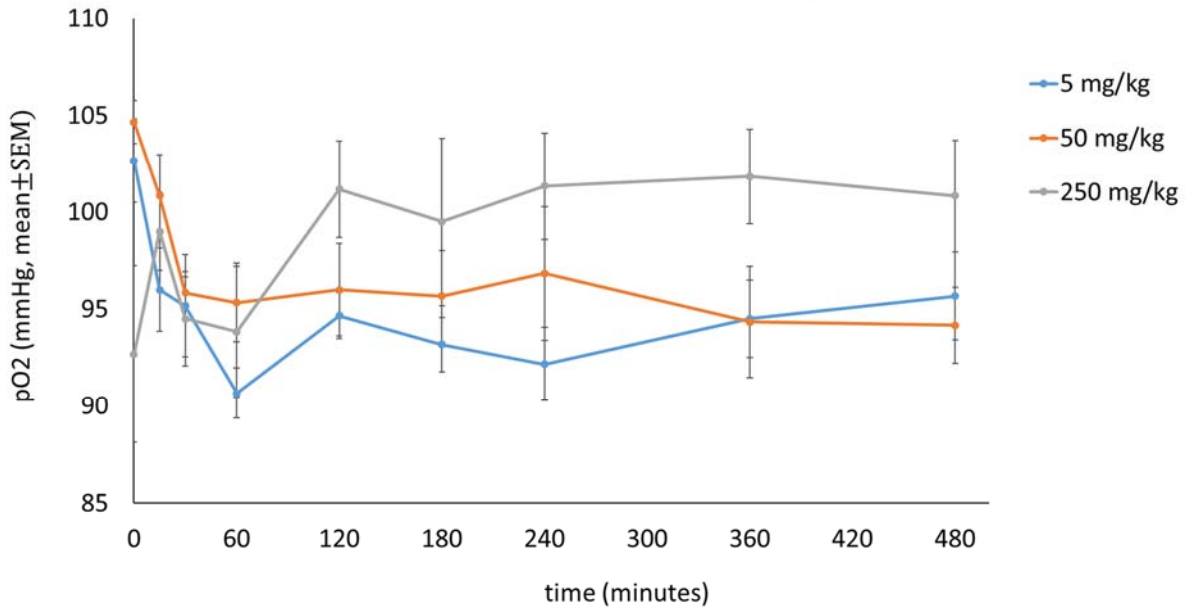

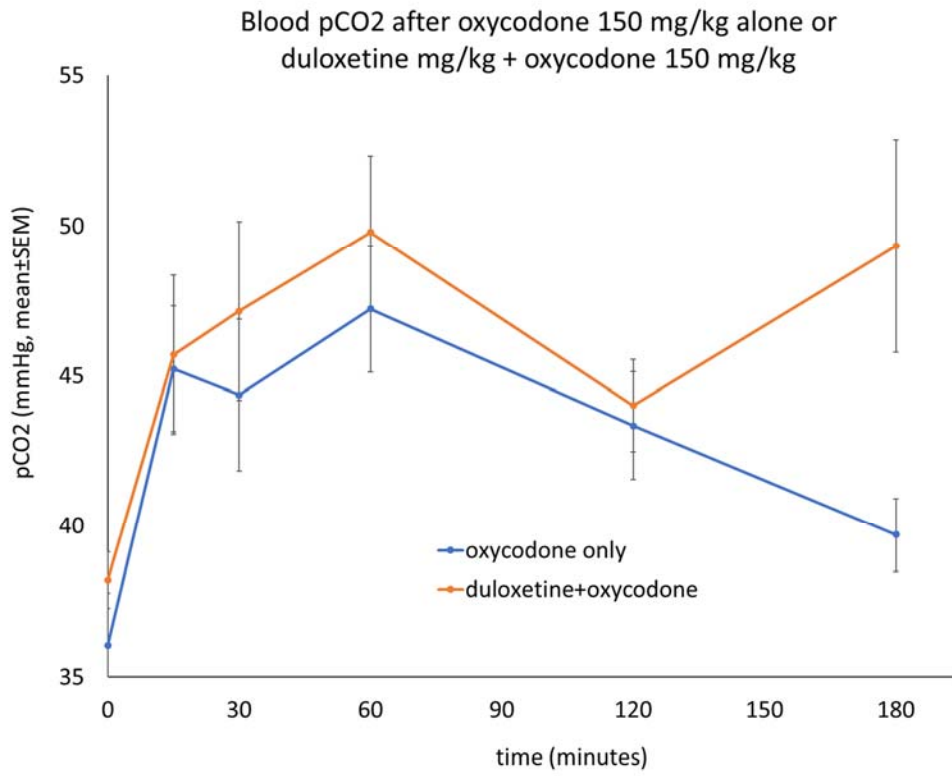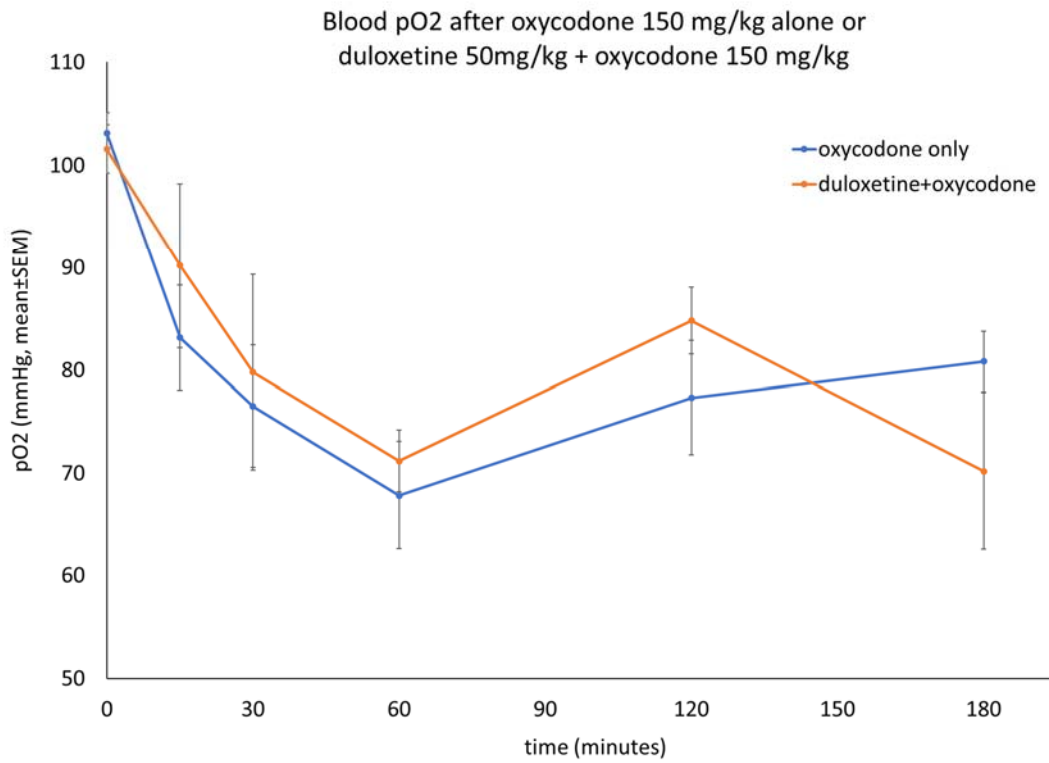

Mirtazapine

Blood pCO2 after Oral Mirtazapine Dosing

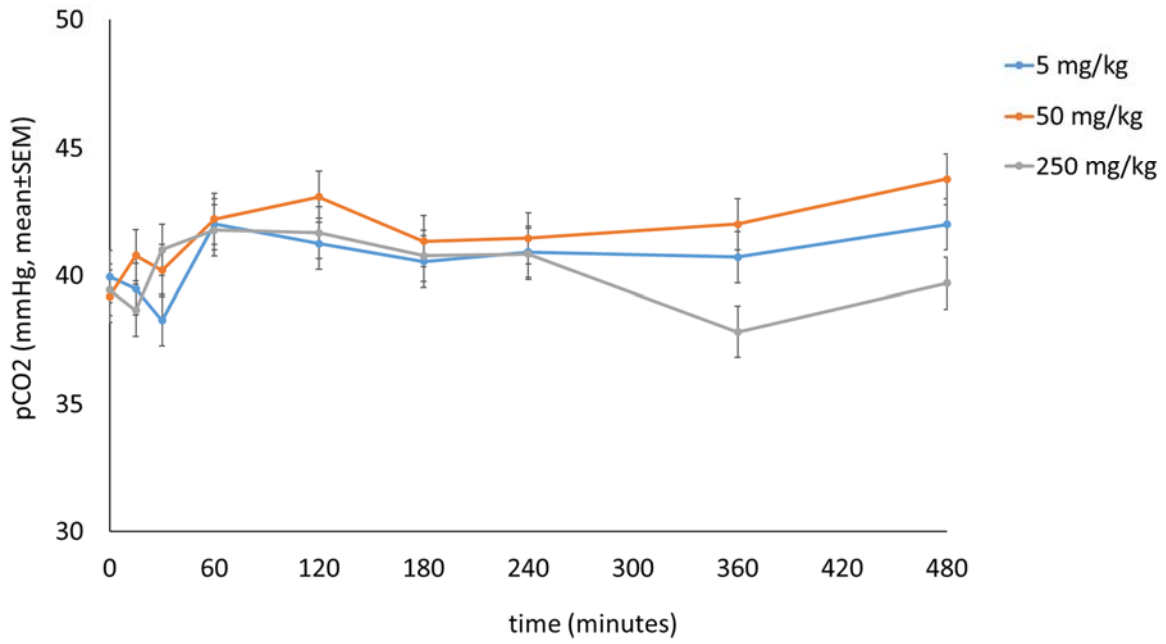

pO2 after Mirtazapine Oral Dosing

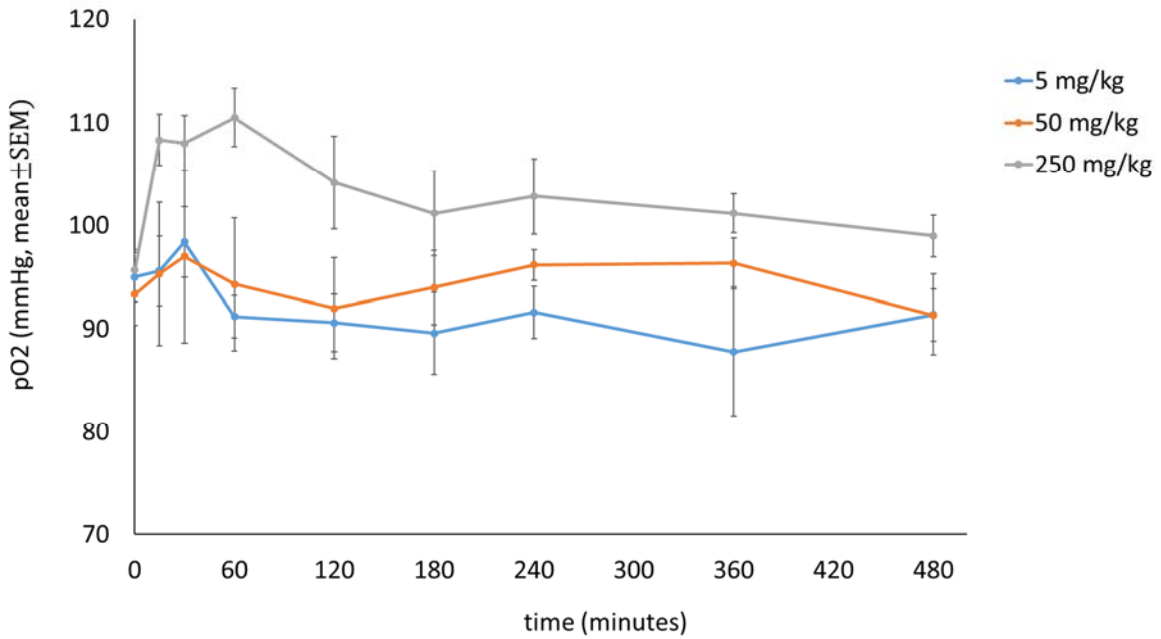

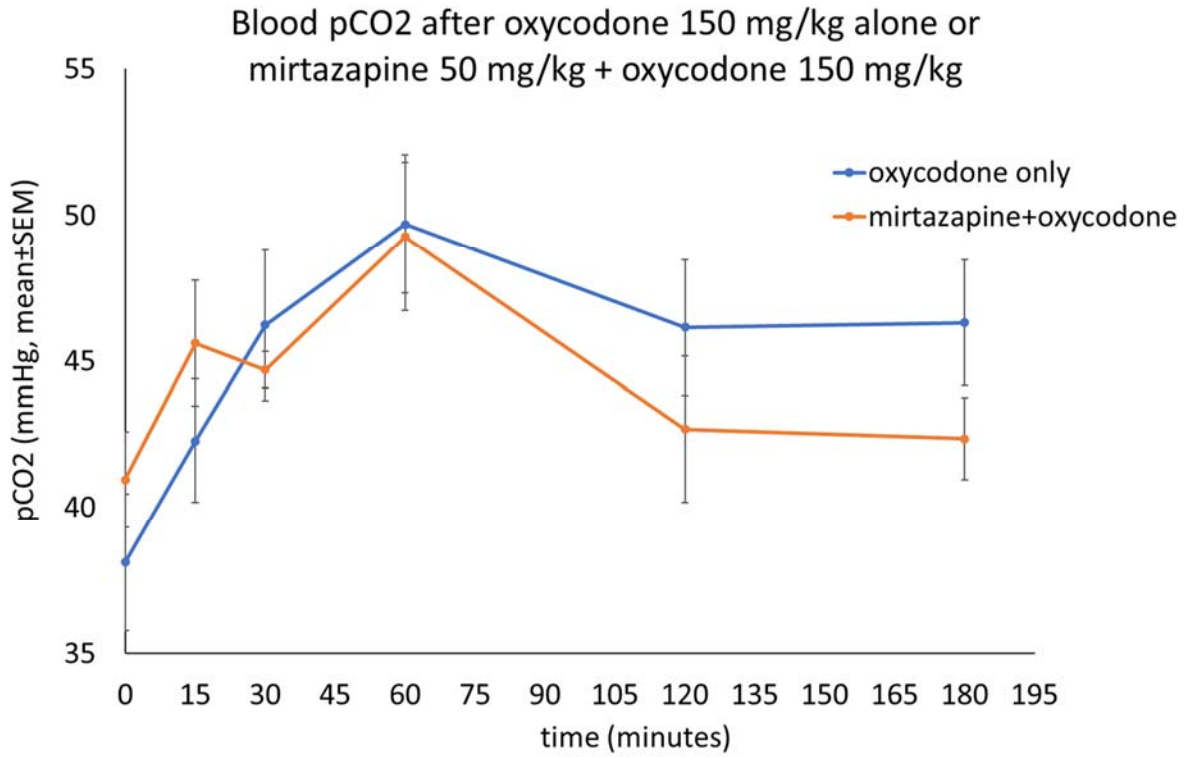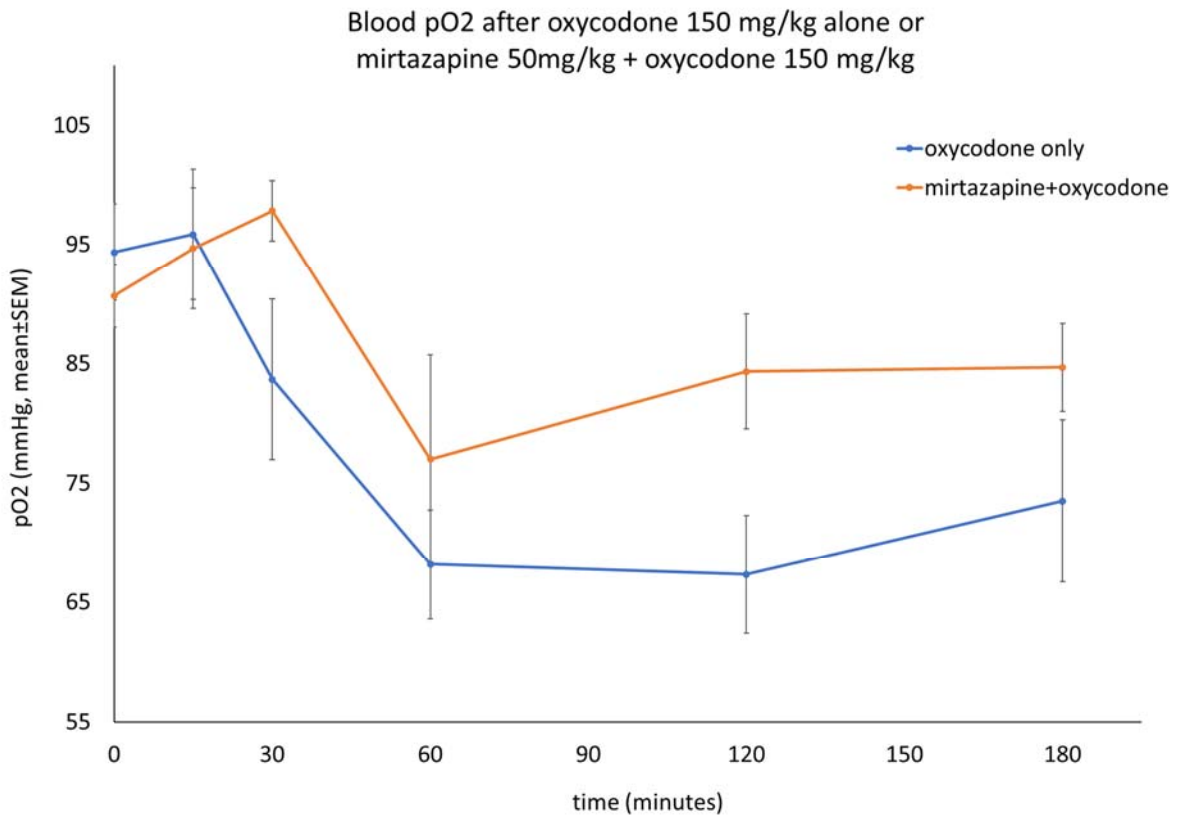

Paroxetine

Blood pCO<sub>2</sub> after Oral Paroxetine Dosing

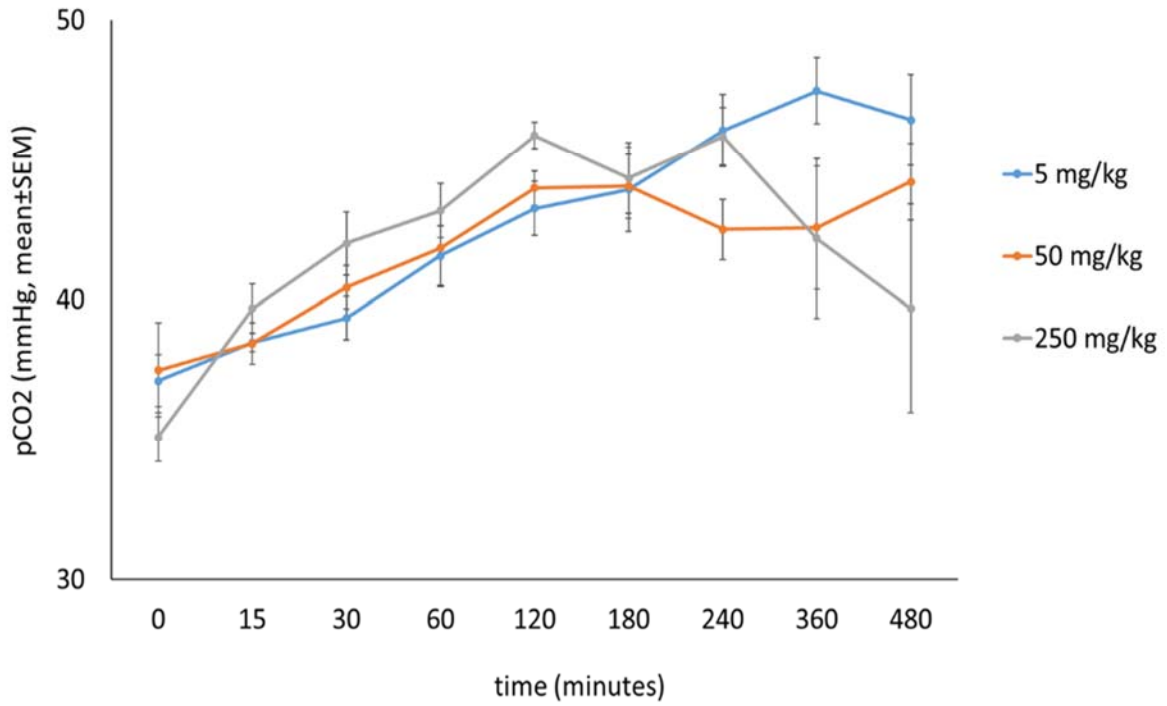

pO<sub>2</sub> after Paroxetine Oral Dosing

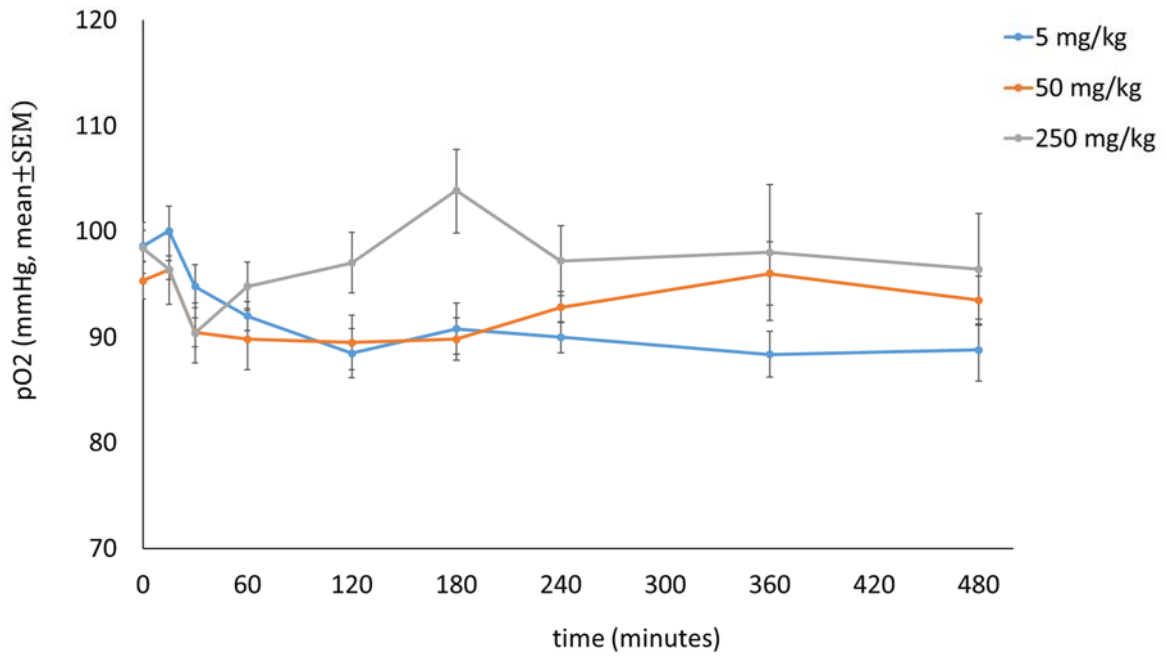



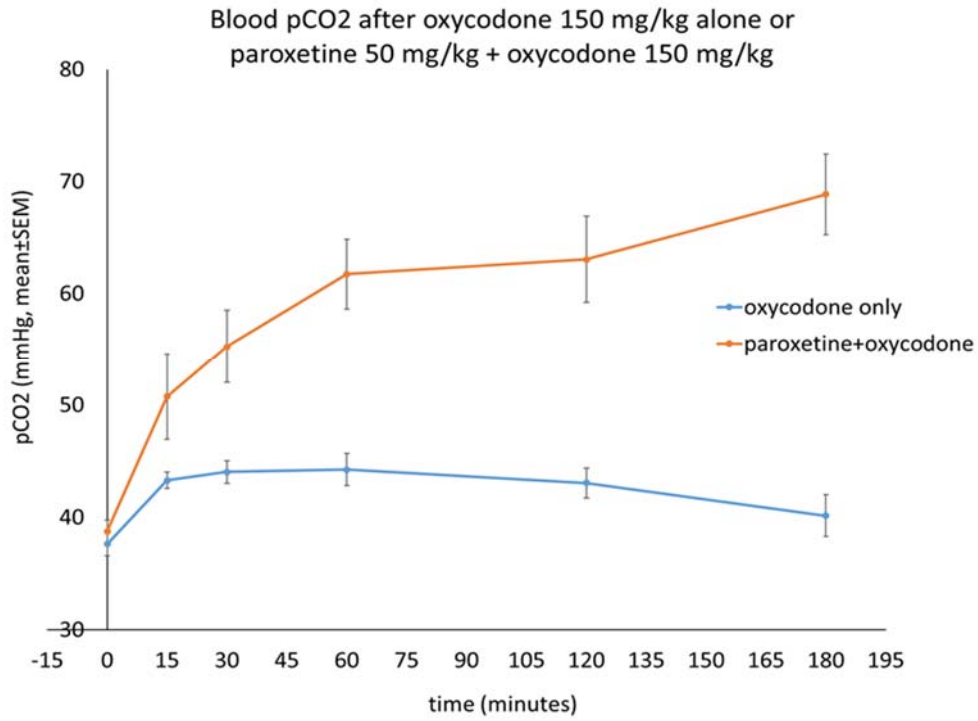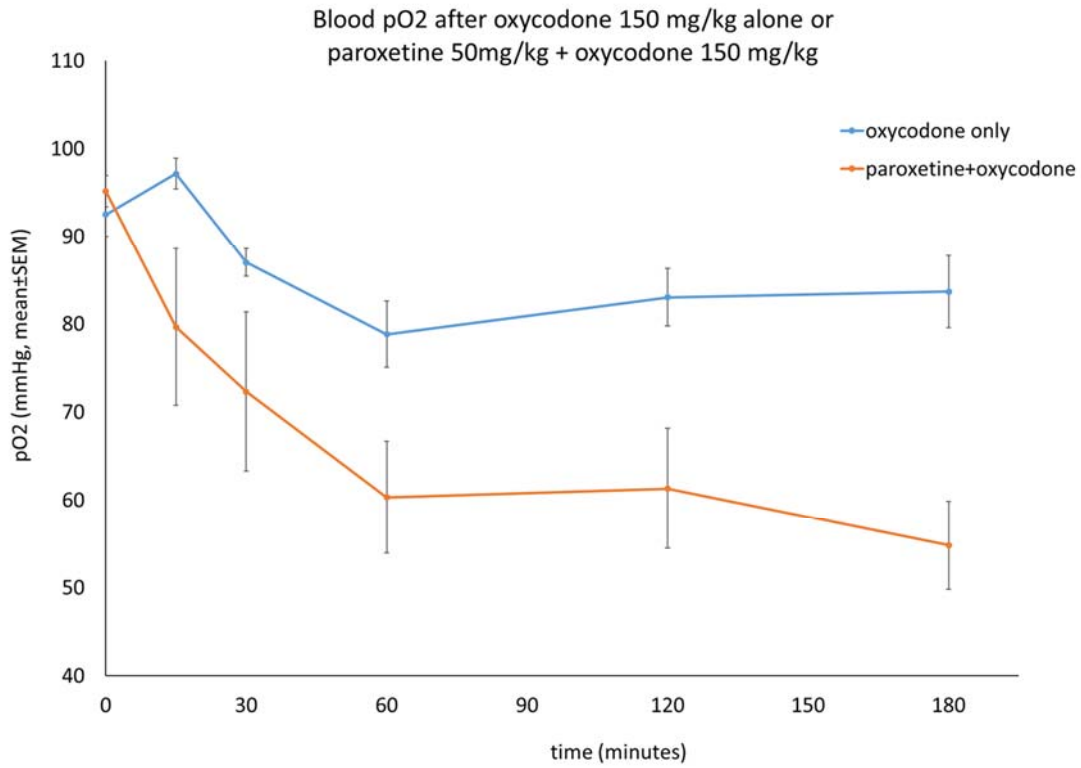

Blood pCO<sub>2</sub> after oxycodone 150 mg/kg alone or paroxetine 5 mg/kg + oxycodone 150 mg/kg

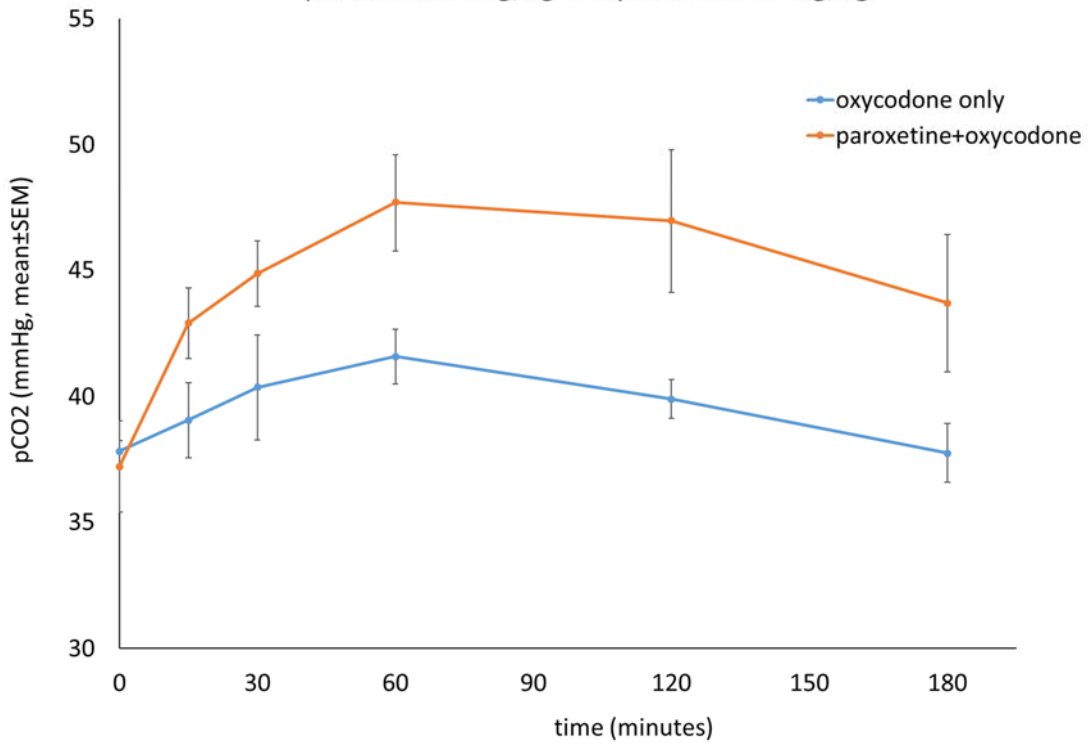

Blood pO<sub>2</sub> after oxycodone 150 mg/kg alone or paroxetine 5mg/kg + oxycodone 150 mg/kg

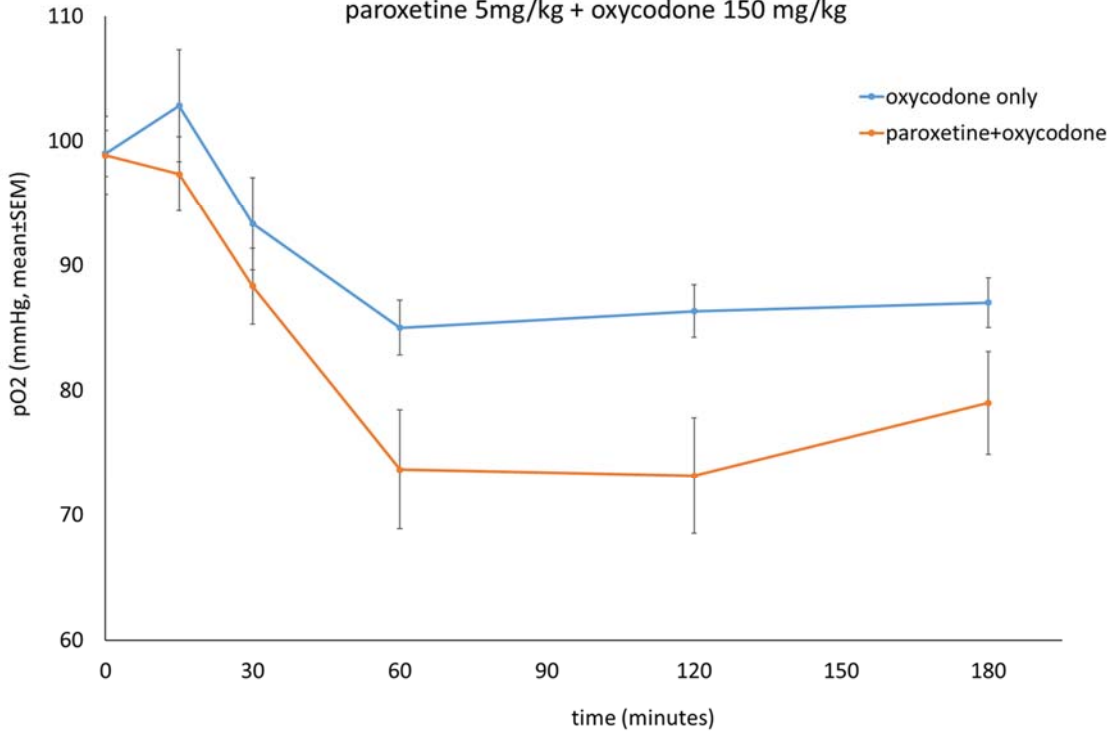

Quetiapine

Blood pCO2 after Oral Quetiapine Dosing

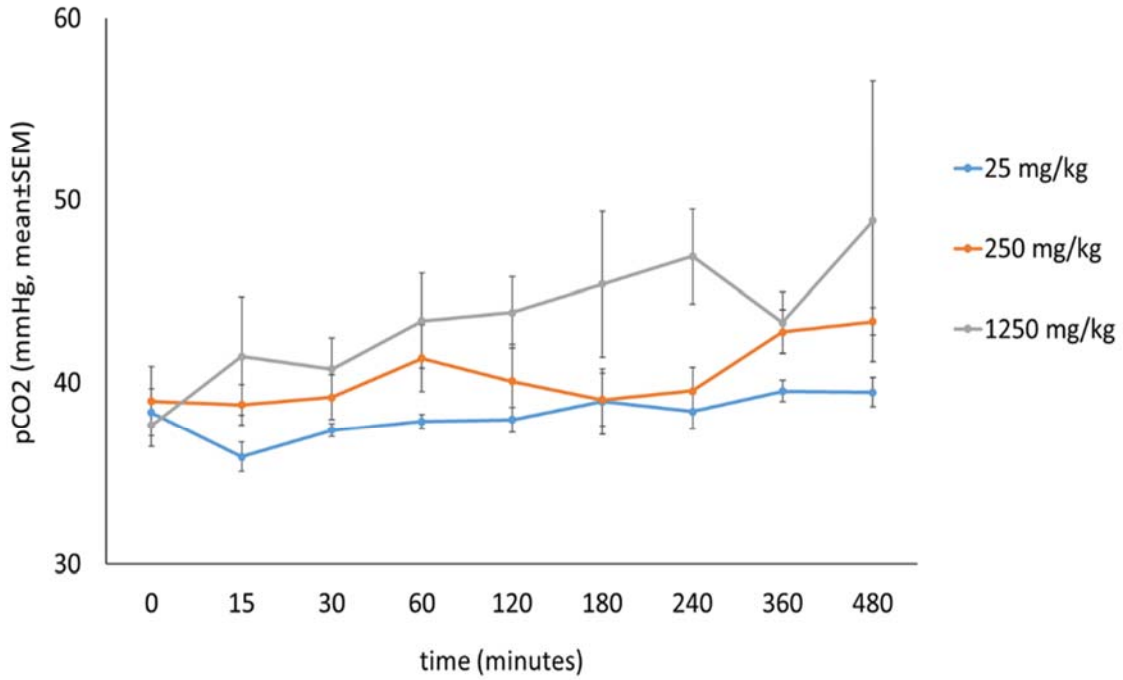

Blood pO2 after Quetiapine Oral Dosing

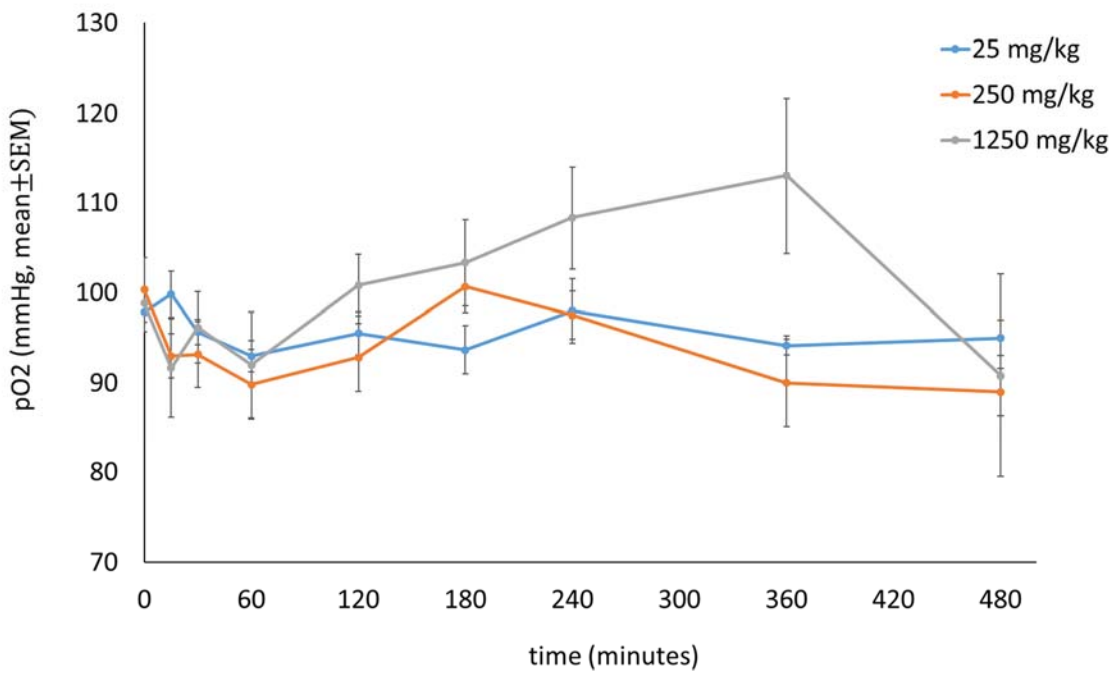

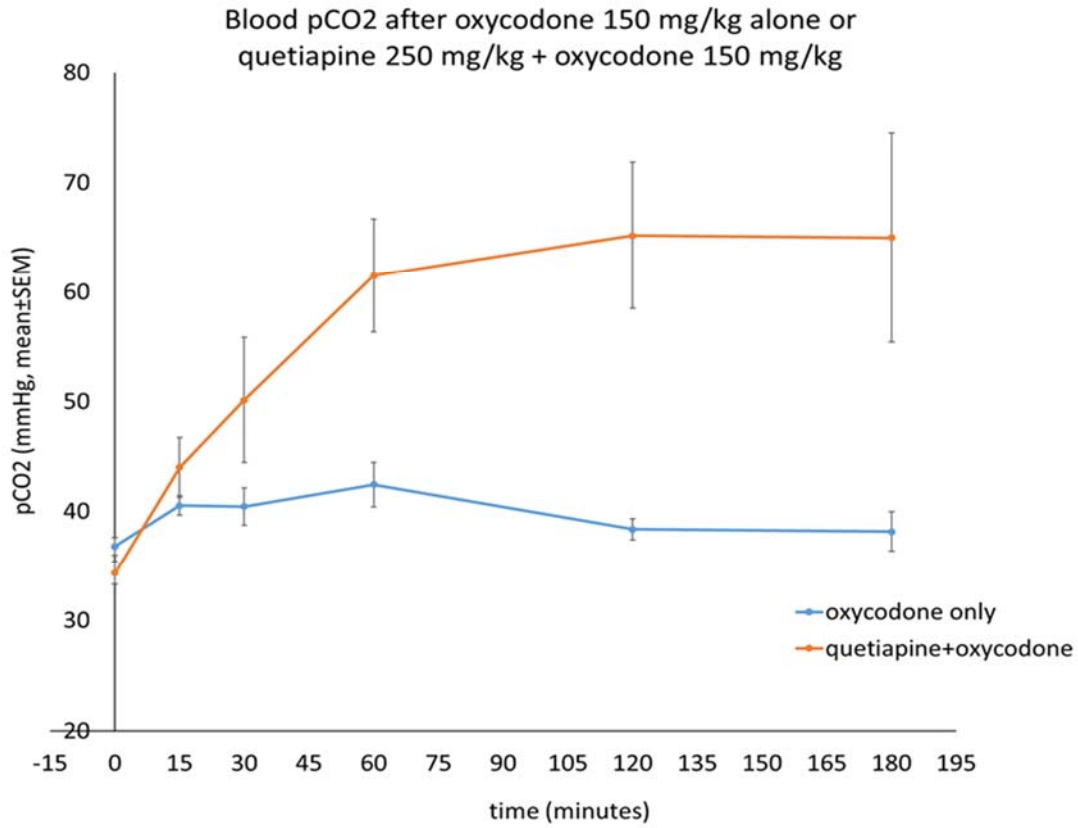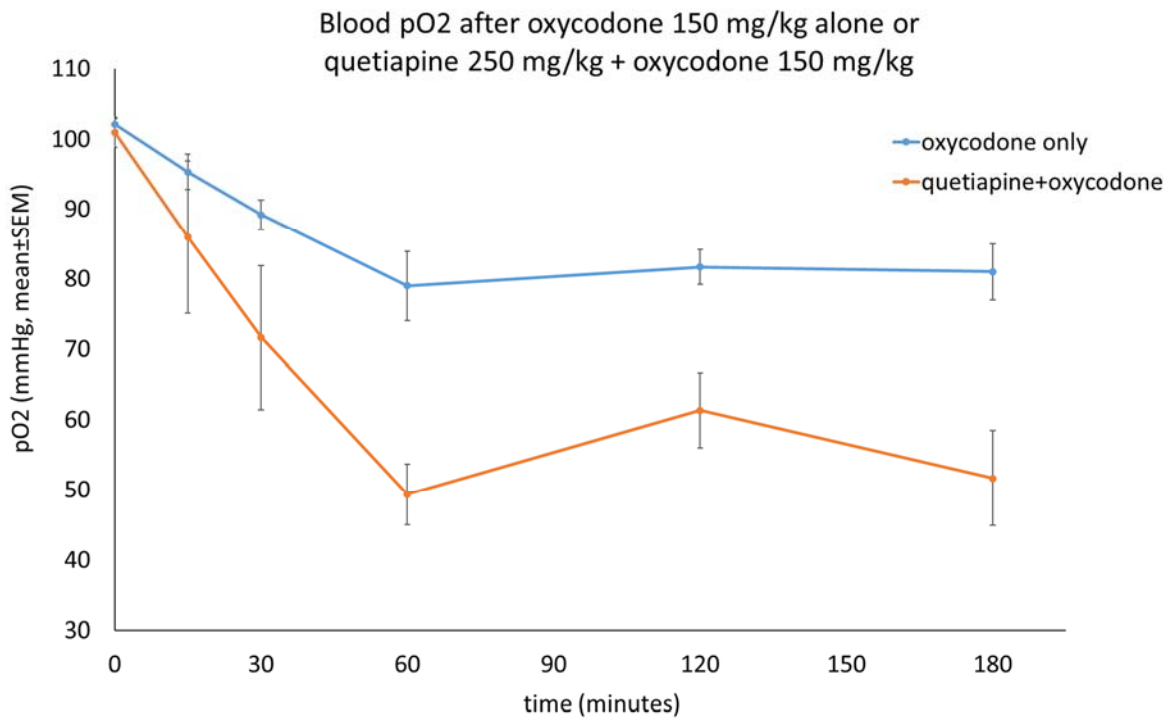

Blood pCO2 after oxycodone 150 mg/kg alone or  
quetiapine 25 mg/kg + oxycodone 150 mg/kg

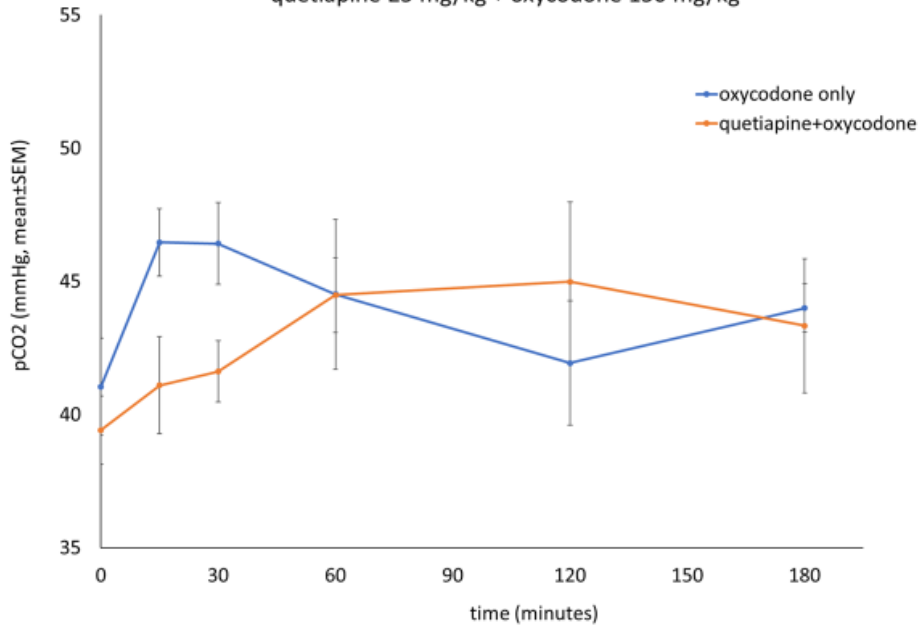

Blood pO2 after oxycodone 150 mg/kg alone or  
quetiapine 25 mg/kg + oxycodone 150 mg/kg

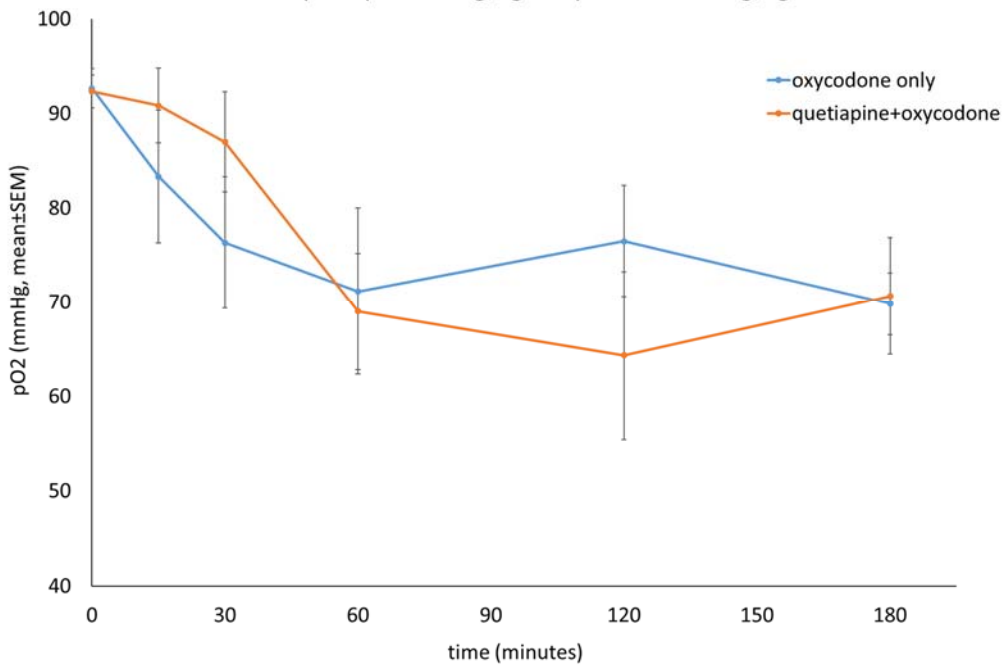

Ramelteon

Blood pCO<sub>2</sub> after Oral Ramelteon Dosing

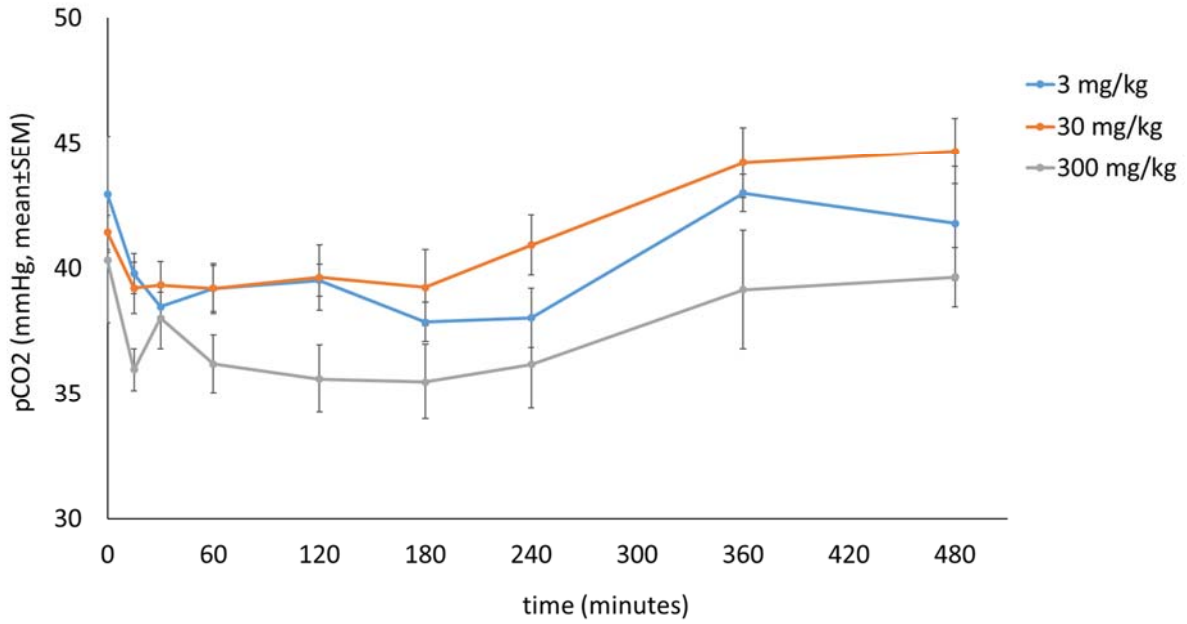

Blood pO<sub>2</sub> after Rameteon Oral Dosing

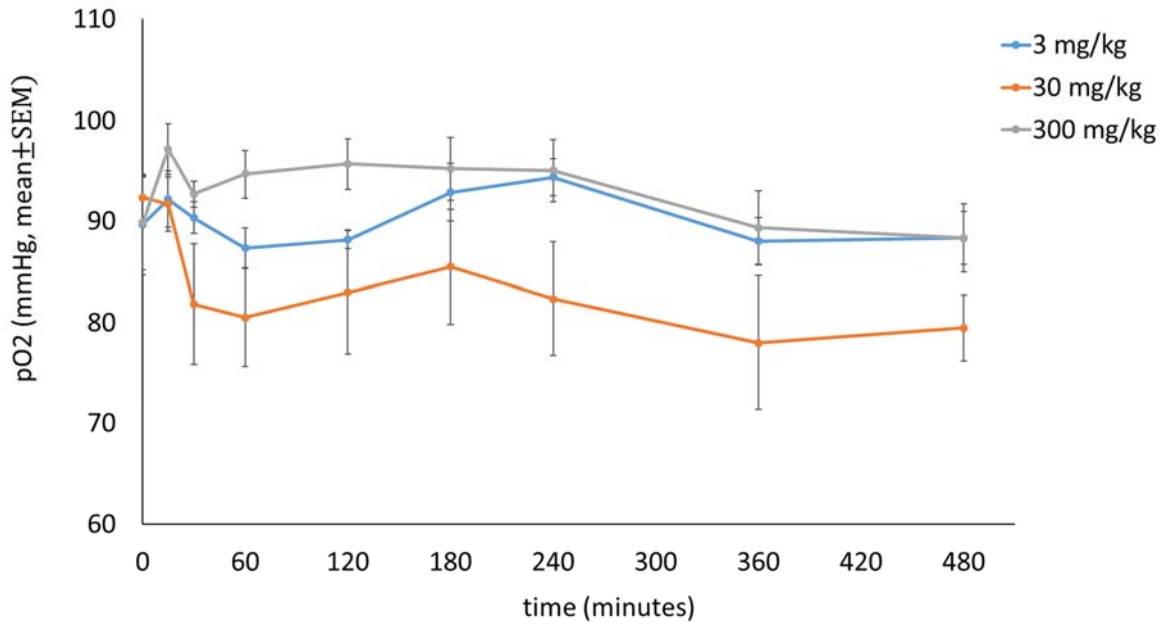

primary & repeat data combined: pCO<sub>2</sub>-oxycodone 150 mg/kg alone  
or in combination with ramelteon 30 mg/kg

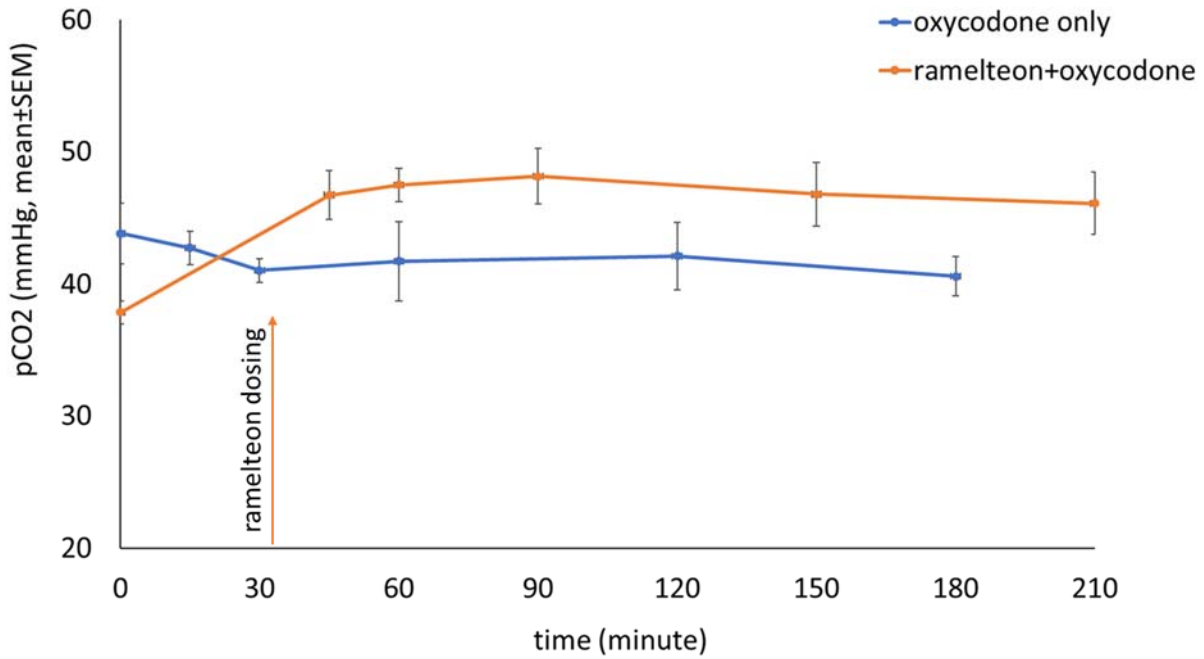

primary & repeat data combined: pO<sub>2</sub>-oxycodone 150 mg/kg alone  
or in combination with ramelteon 30 mg/kg

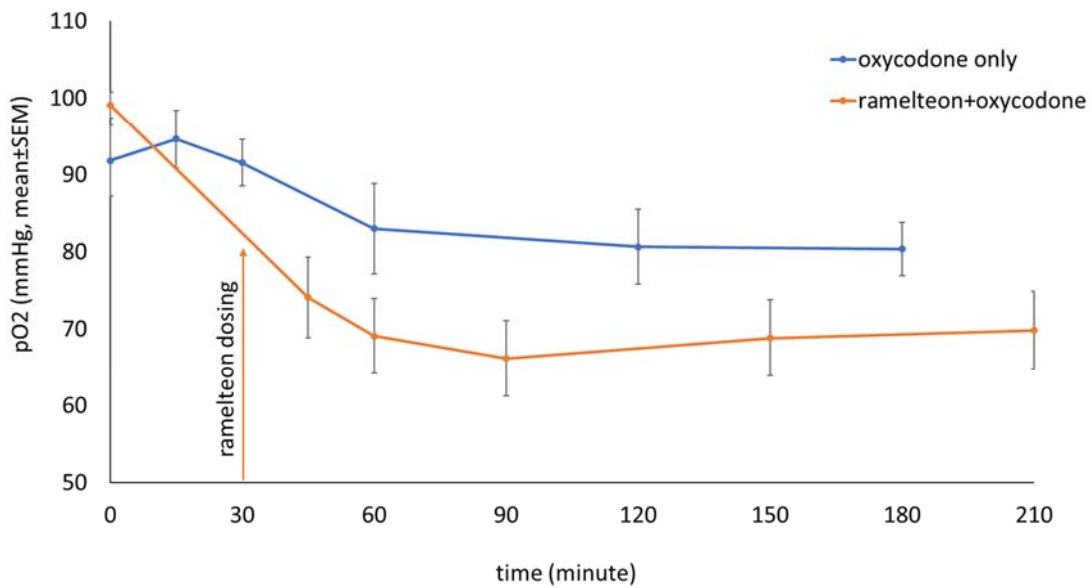

Risperidone

Blood pCO2 after Oral Risperidone Dosing

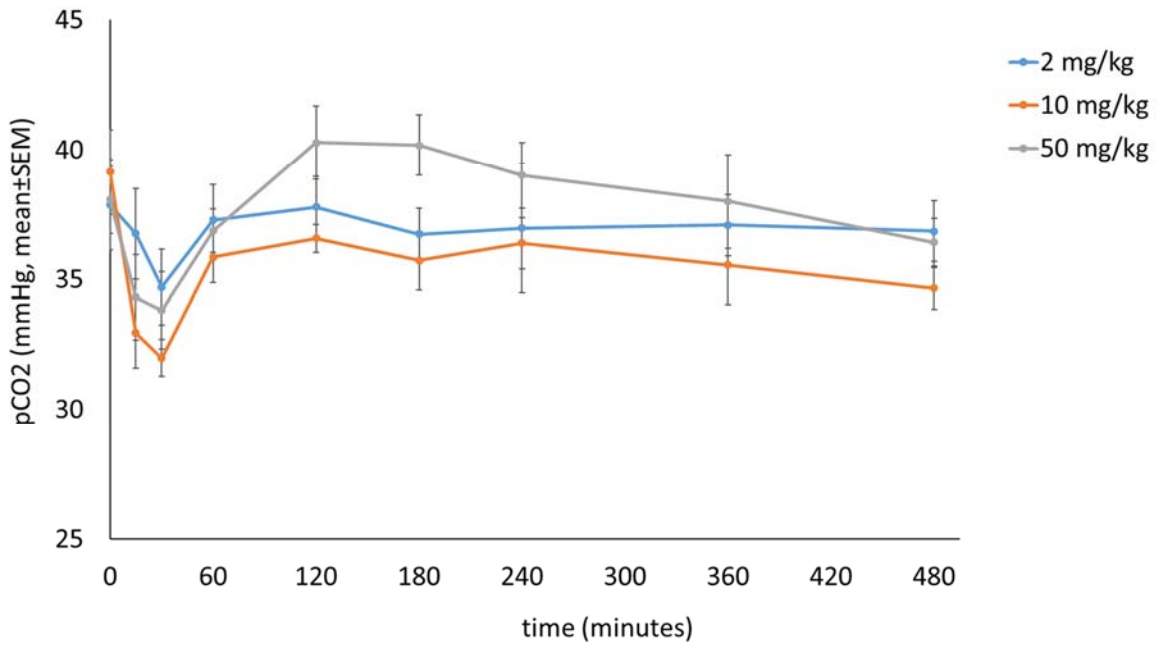

Blood pO2 after Risperidone Oral Dosing

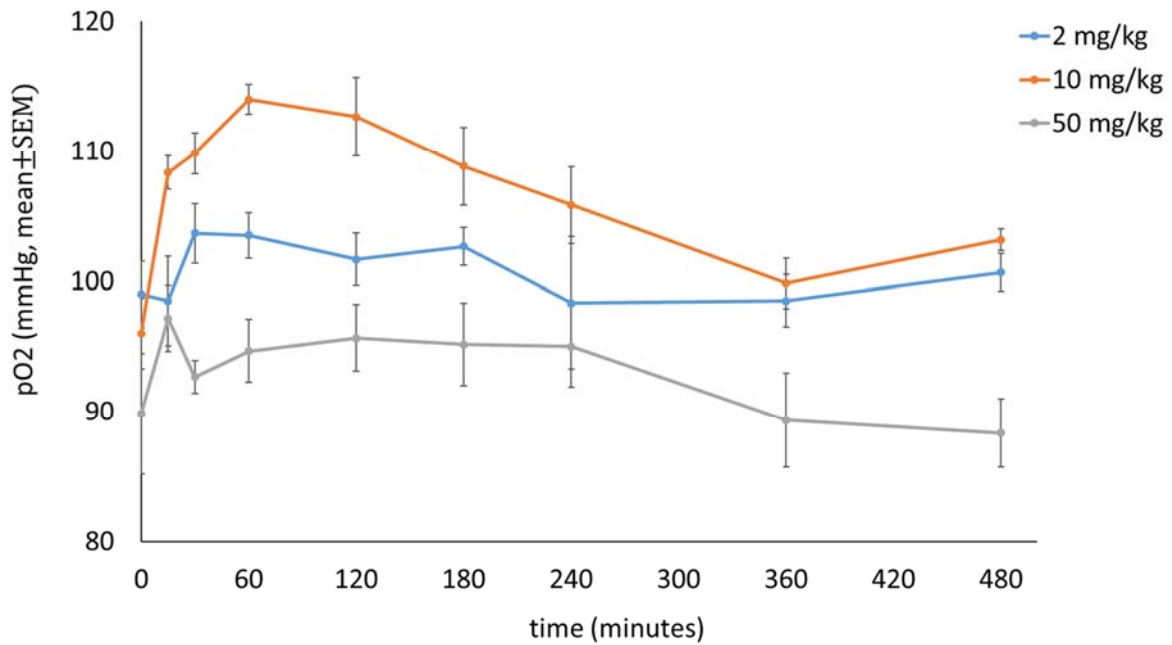



Blood pCO<sub>2</sub> after oxycodone 150 mg/kg alone or risperidone 10 mg/kg + oxycodone 150 mg/kg

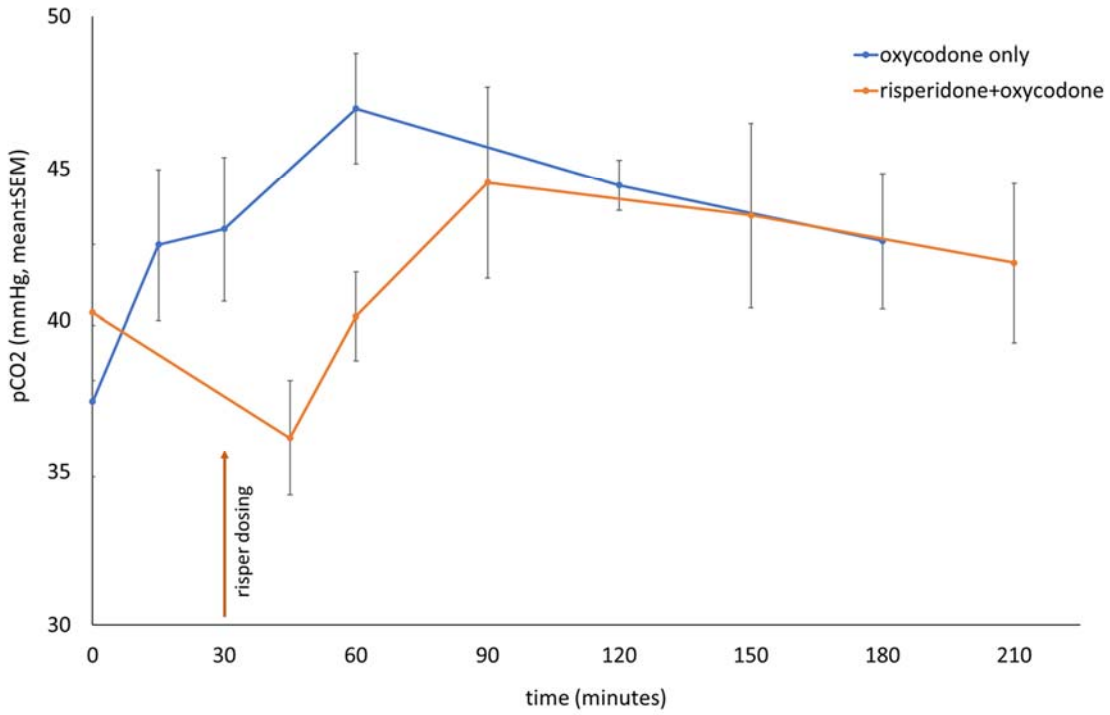

Blood pO<sub>2</sub> after oxycodone 150 mg/kg alone or risperidone 10 mg/kg + oxycodone 150 mg/kg

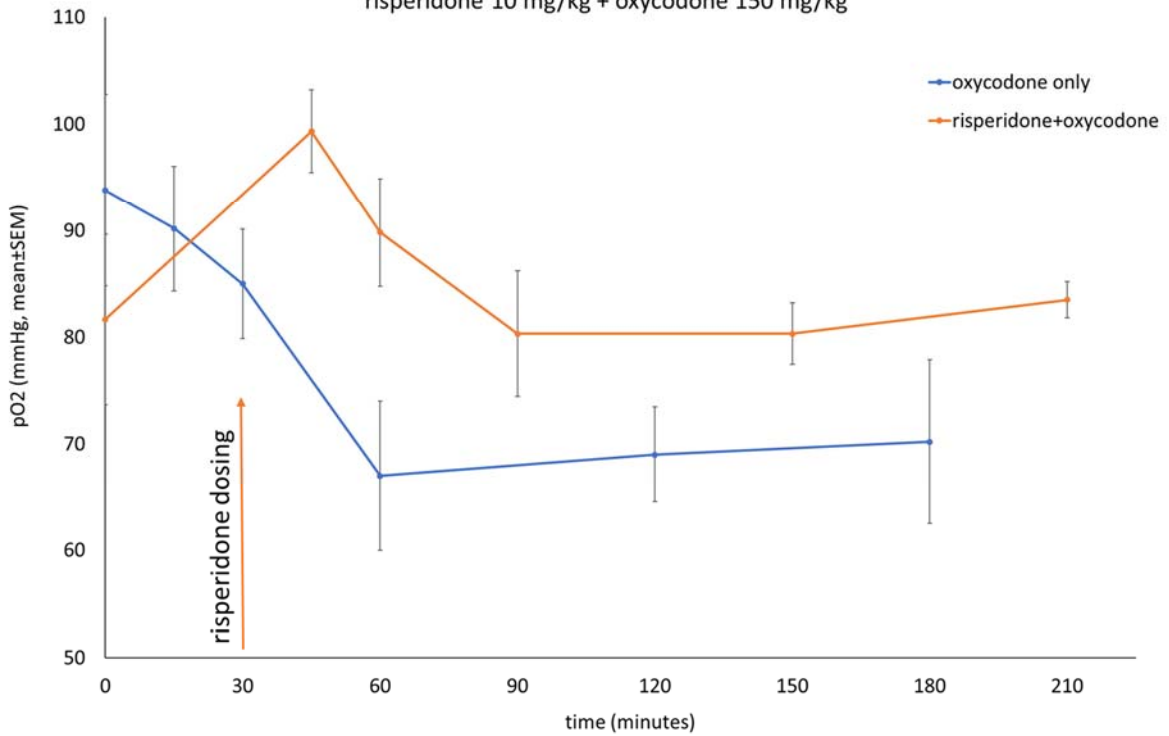

Suvorexant

Blood pCO<sub>2</sub> after Oral Suvorexant Dosing

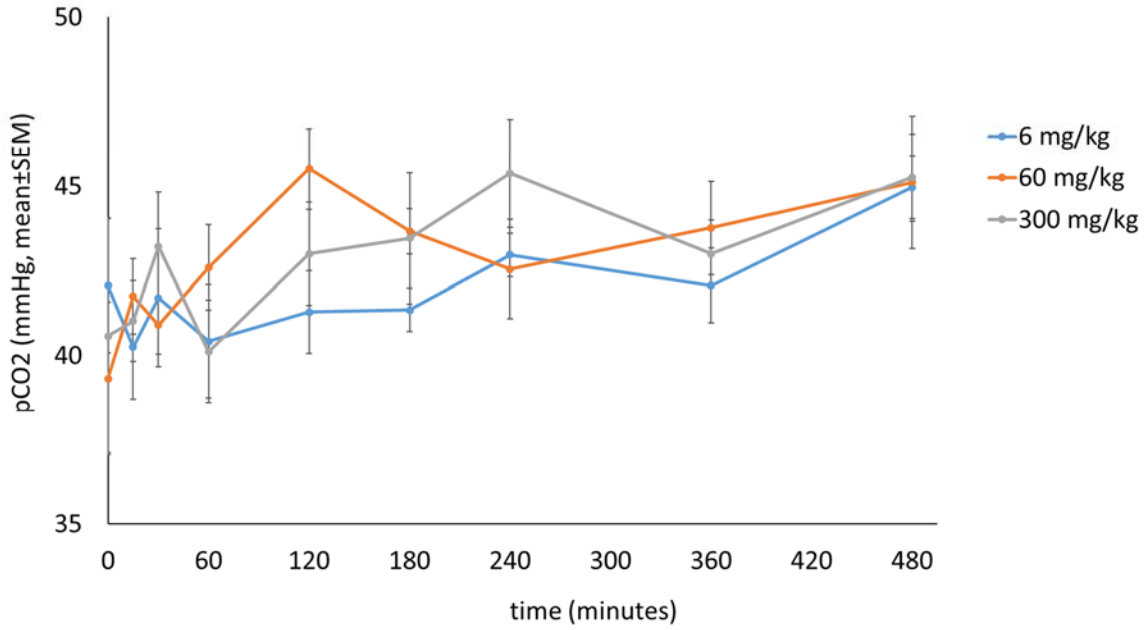

Blood pO<sub>2</sub> after Suvorexant Oral Dosing

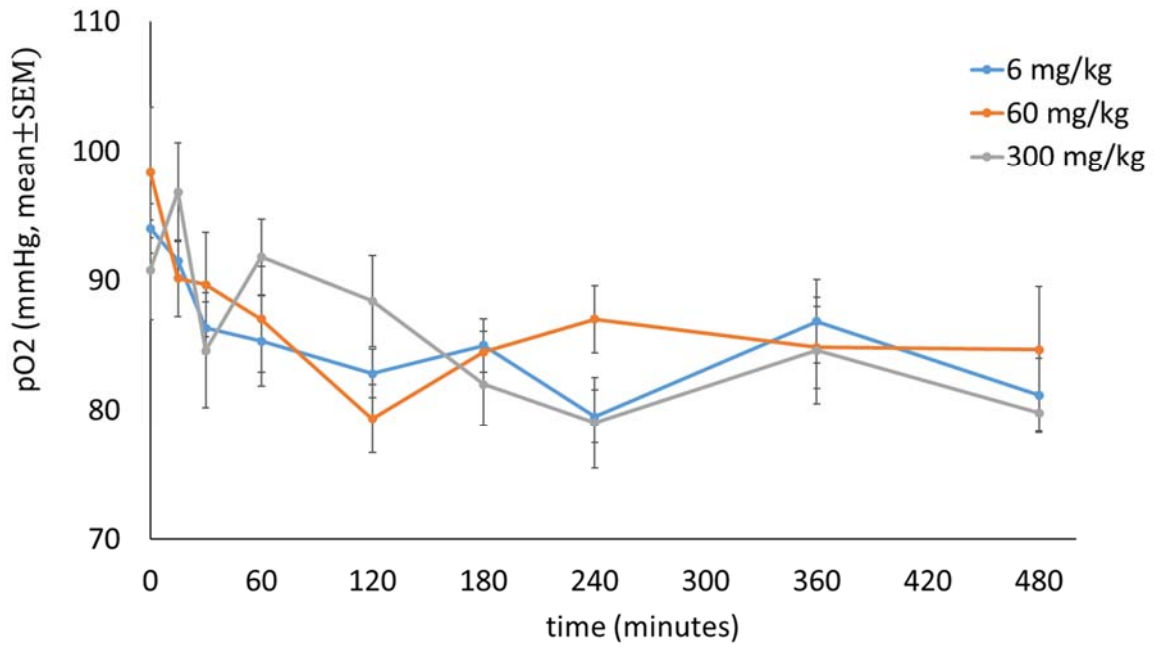

Blood pCO2 after oxycodone 150 mg/kg alone or suvorexant 60 mg/kg + oxycodone 150 mg/kg

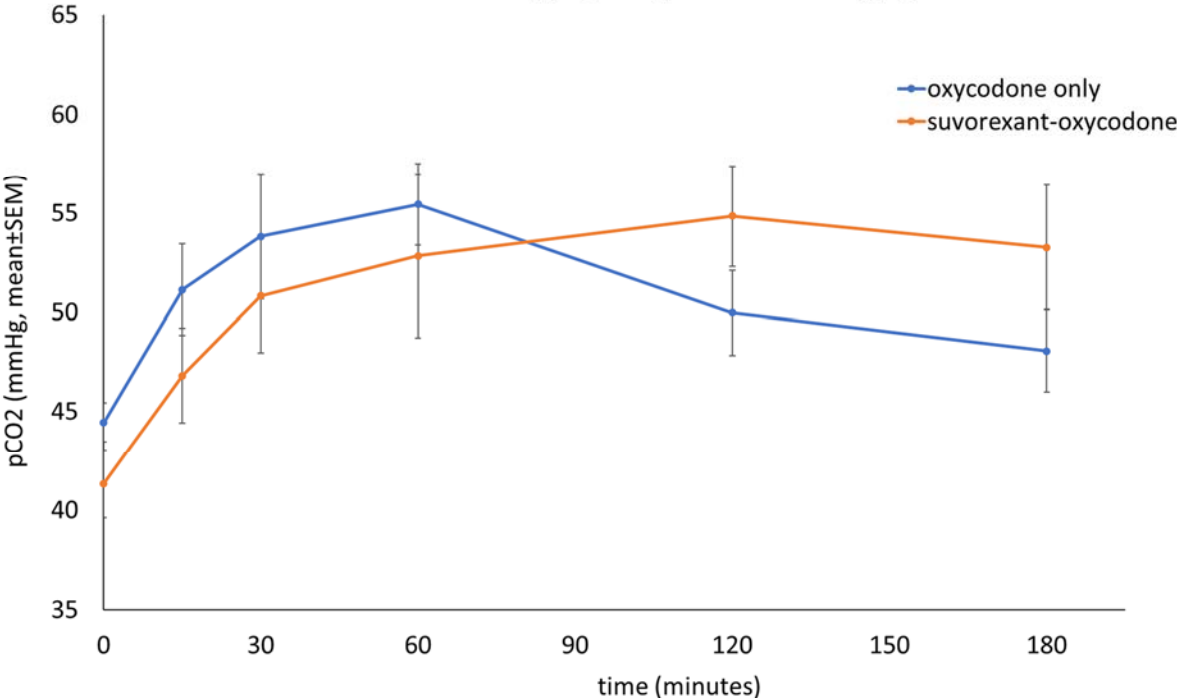

Blood pO2 after oxycodone 150 mg/kg alone or suvorexant 60 mg/kg + oxycodone 150 mg/kg

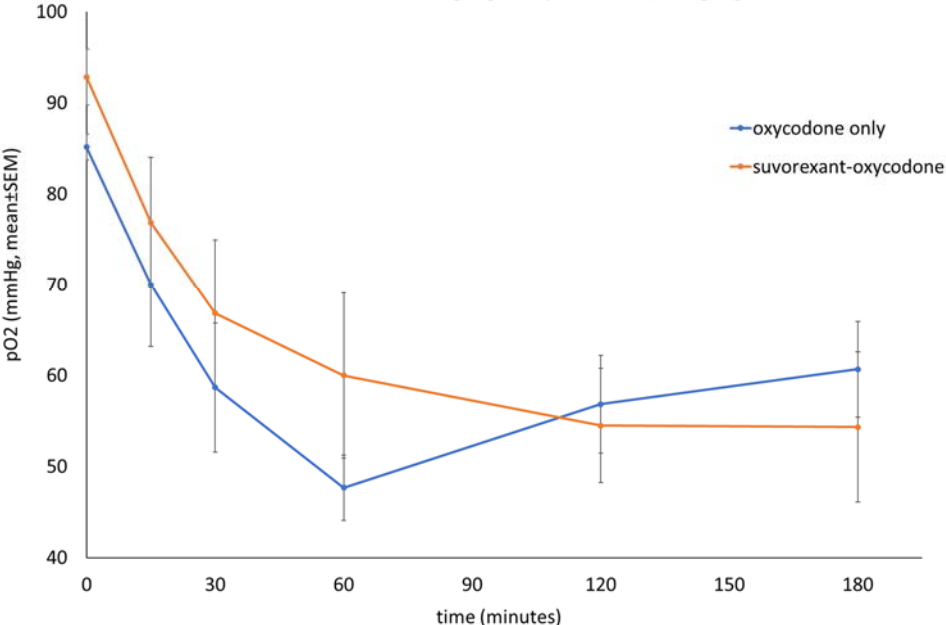

Topiramate

Blood pCO<sub>2</sub> after Oral Topiramate Dosing

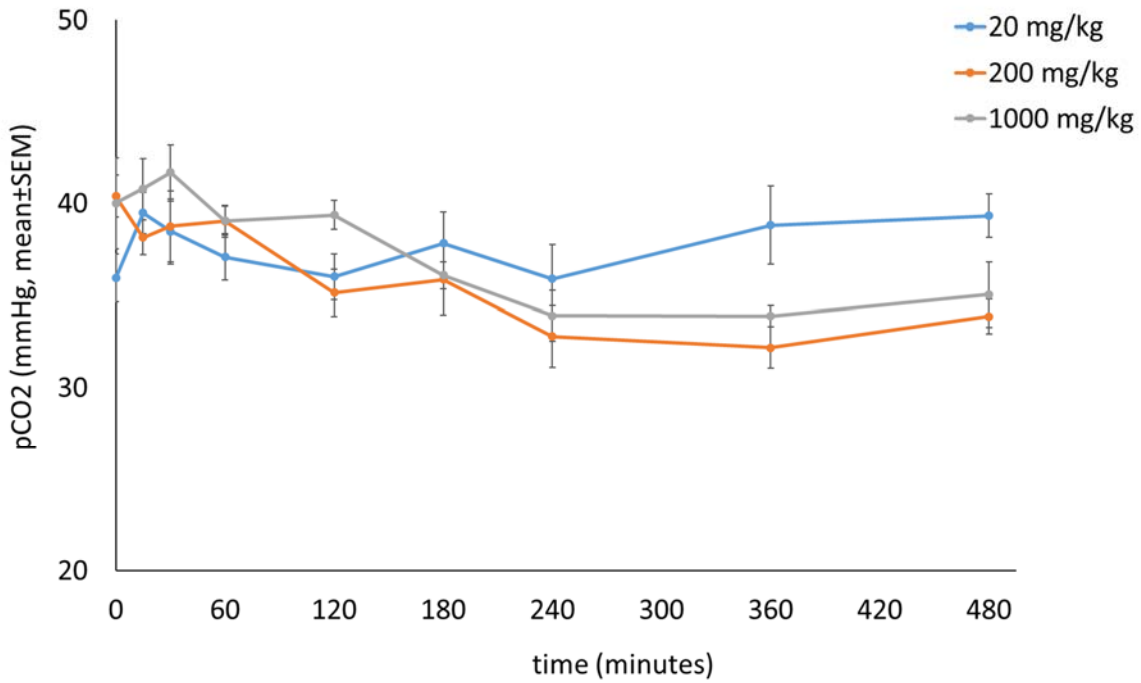

Blood pO<sub>2</sub> after Topiramate Oral Dosing

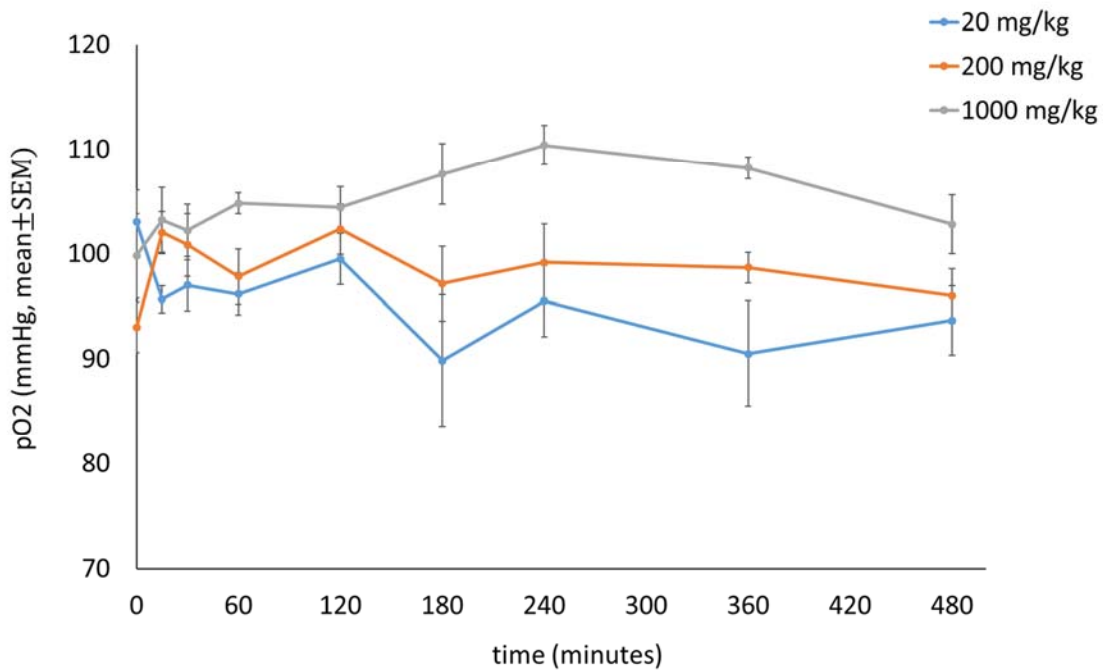

primary & repeat data combined: pCO<sub>2</sub>- oxycodone 150 mg/kg alone  
or topiramate 20 mg/kg + oxycodone 150 mg/kg

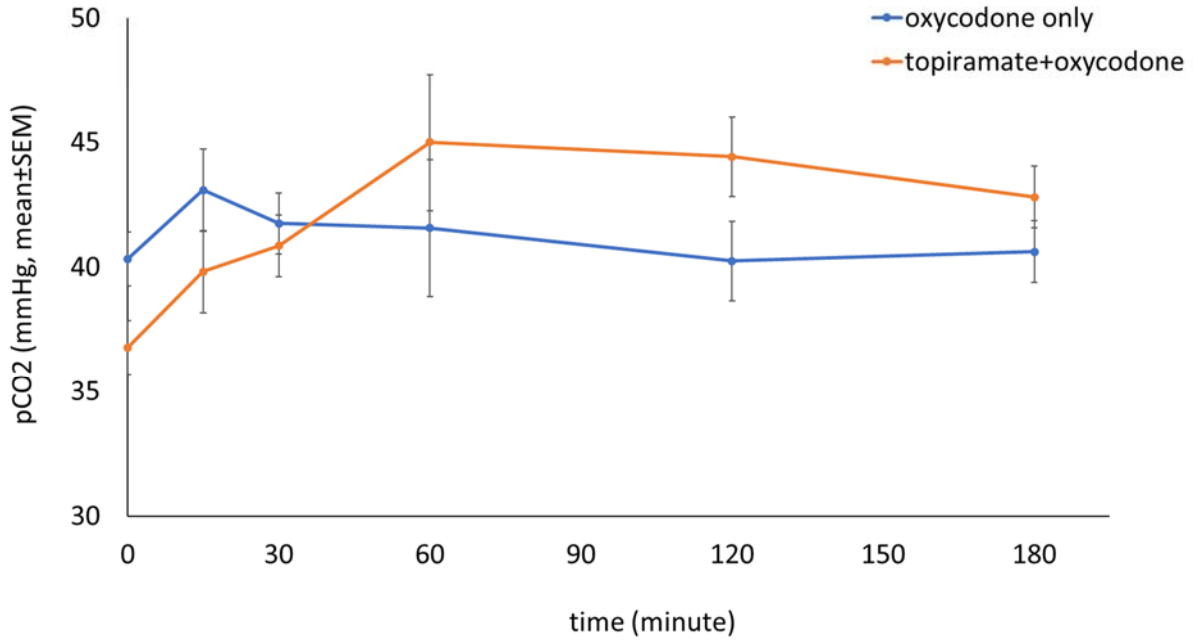

primary & repeat data combined: pO<sub>2</sub>- oxycodone 150 mg/kg alone  
or topiramate 20 mg/kg + oxycodone 150 mg/kg

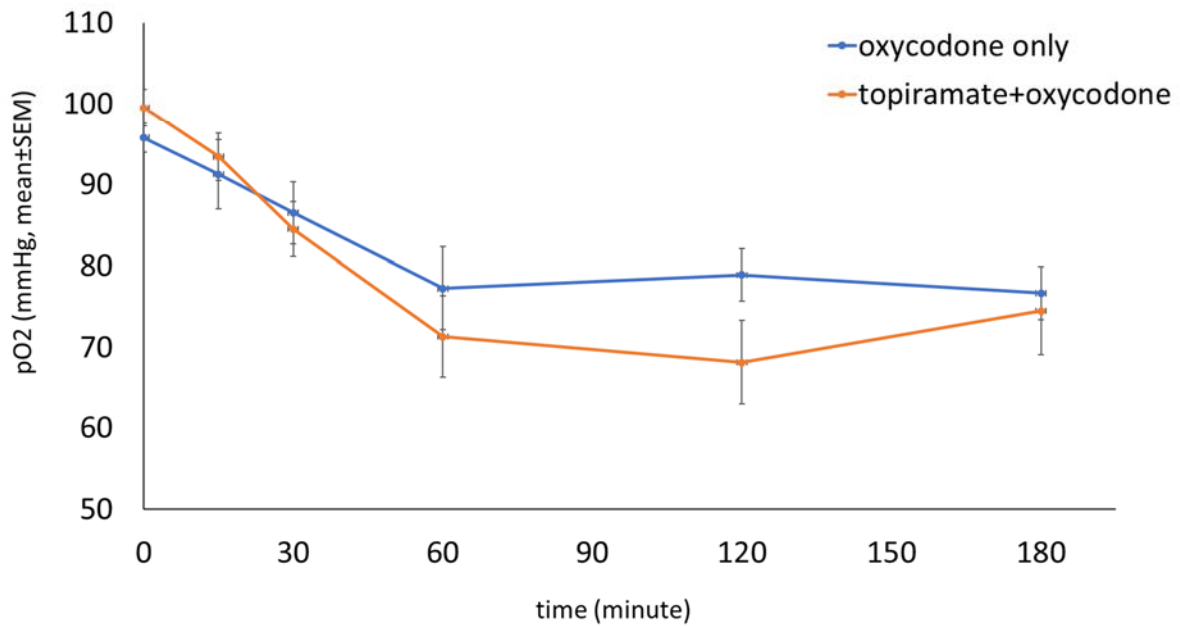

Trazodone

Blood pCO<sub>2</sub> after Oral Trazodone Dosing

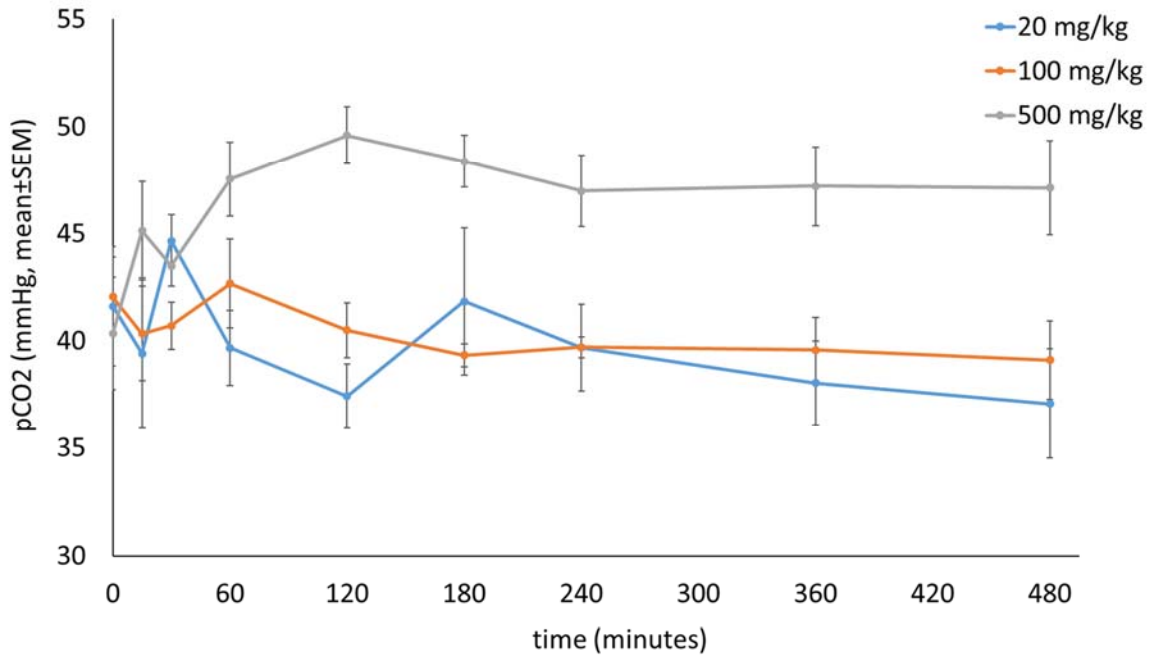

Blood pO<sub>2</sub> after Trazodone Oral Dosing

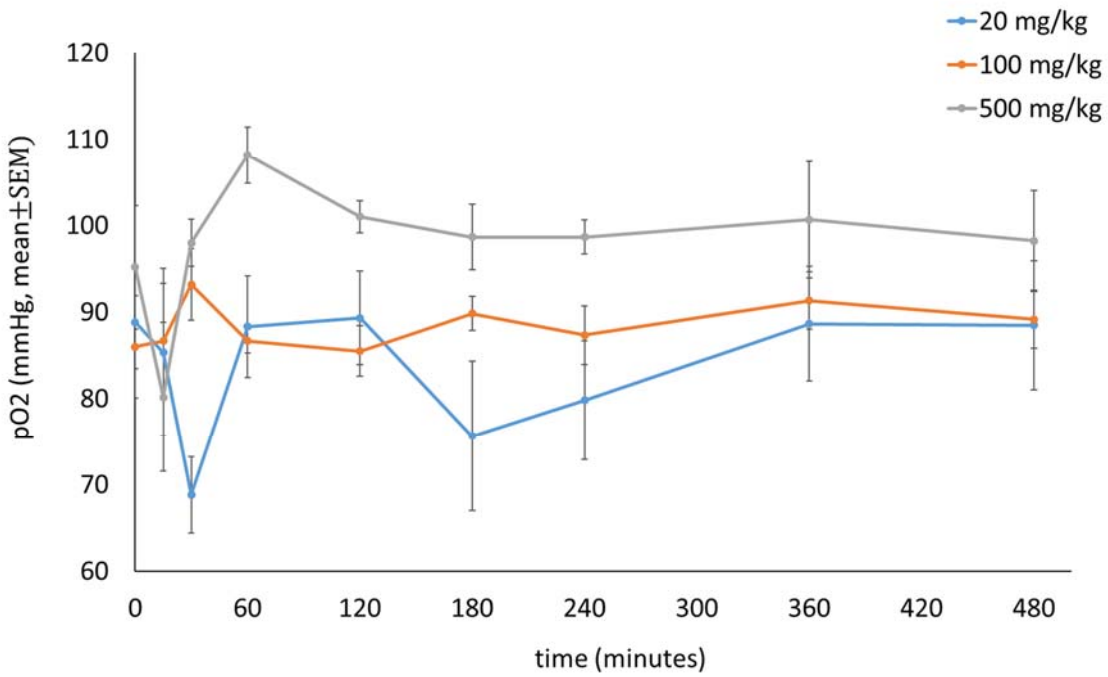

primary & repeat data combined: pCO<sub>2</sub>- oxycodone 150 mg/kg alone  
or trazodone 100 mg/kg+oxycodone 150 mg/kg

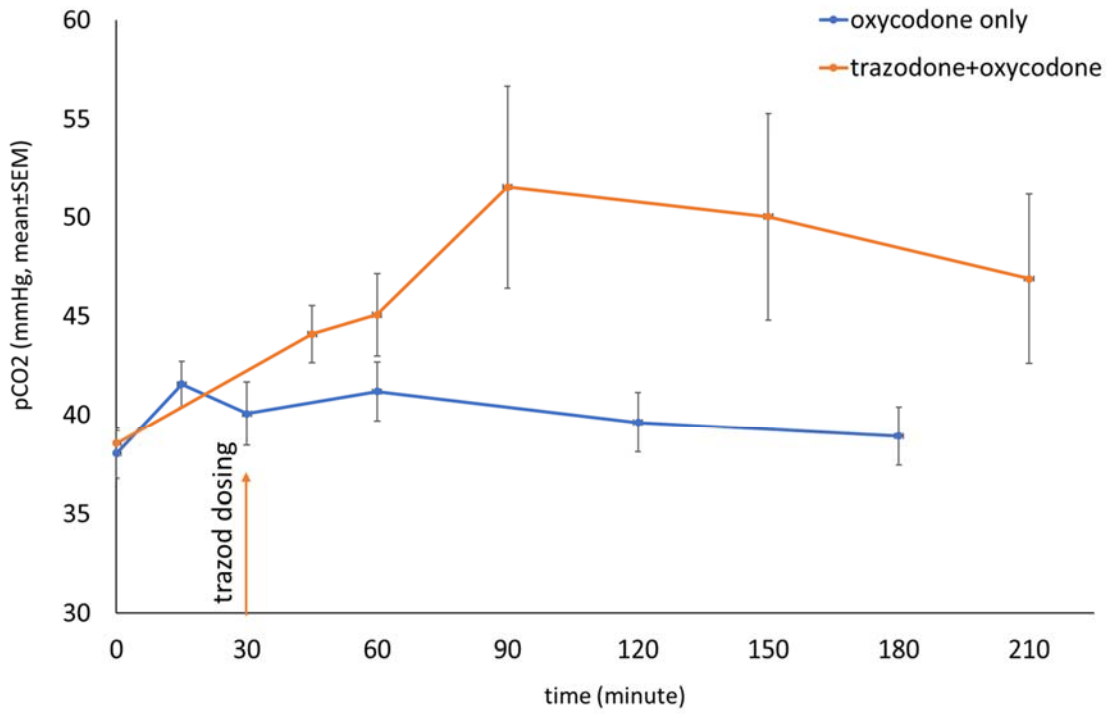

primary & repeat data combined: pO<sub>2</sub>- oxycodone 150 mg/kg alone  
or trazodone 100 mg/kg+oxycodone 150 mg/kg

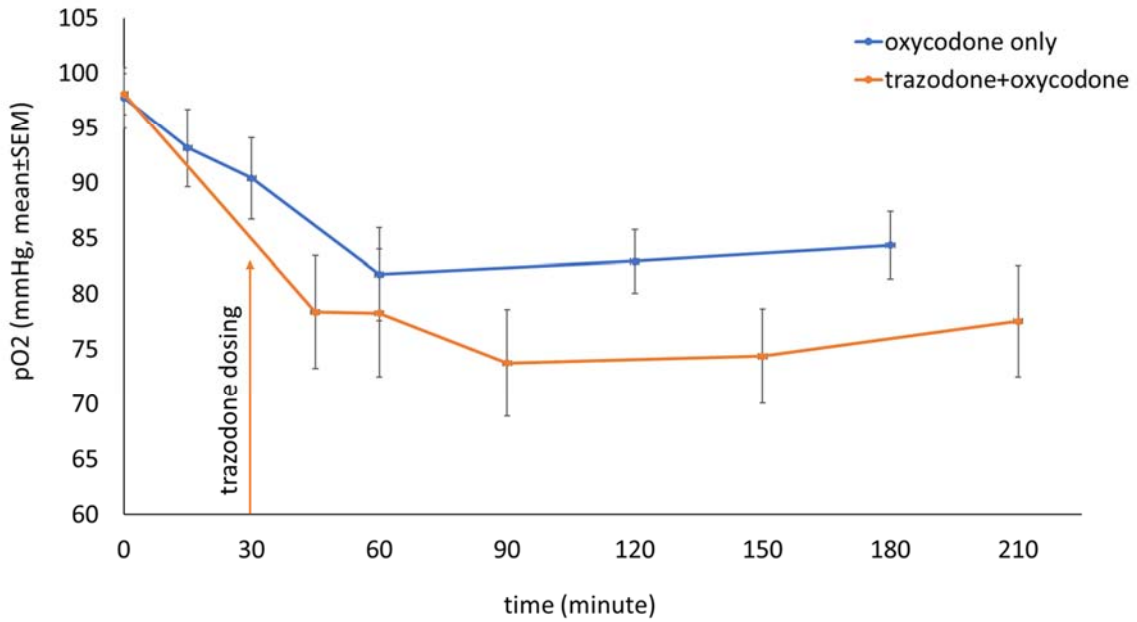

Zolpidem

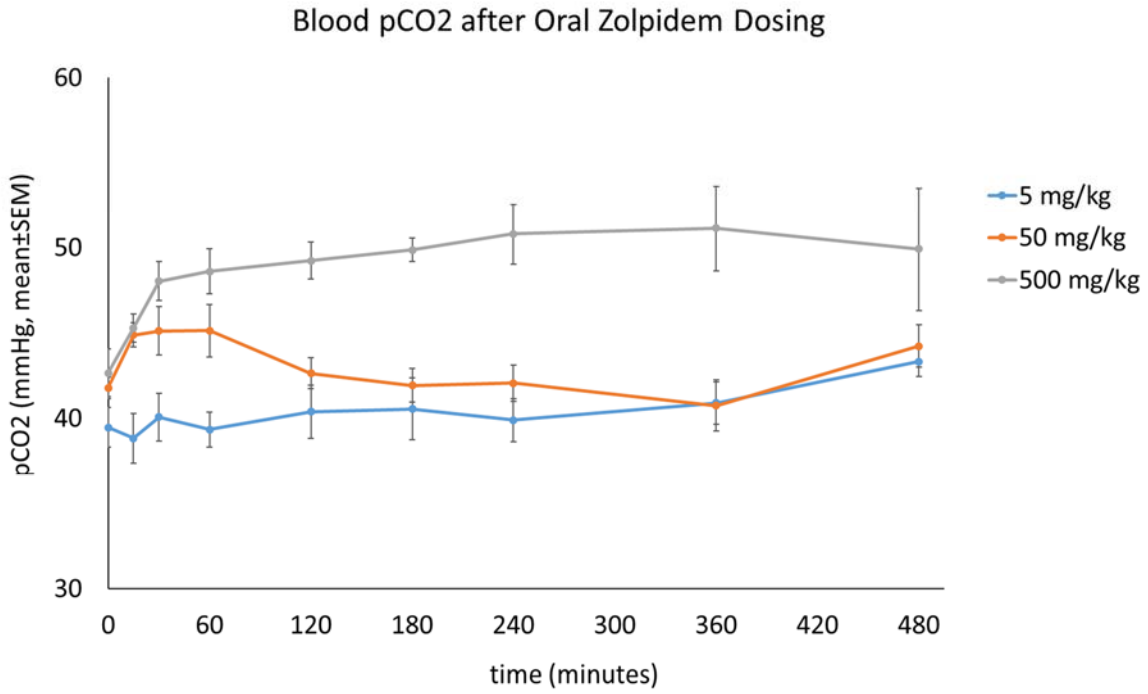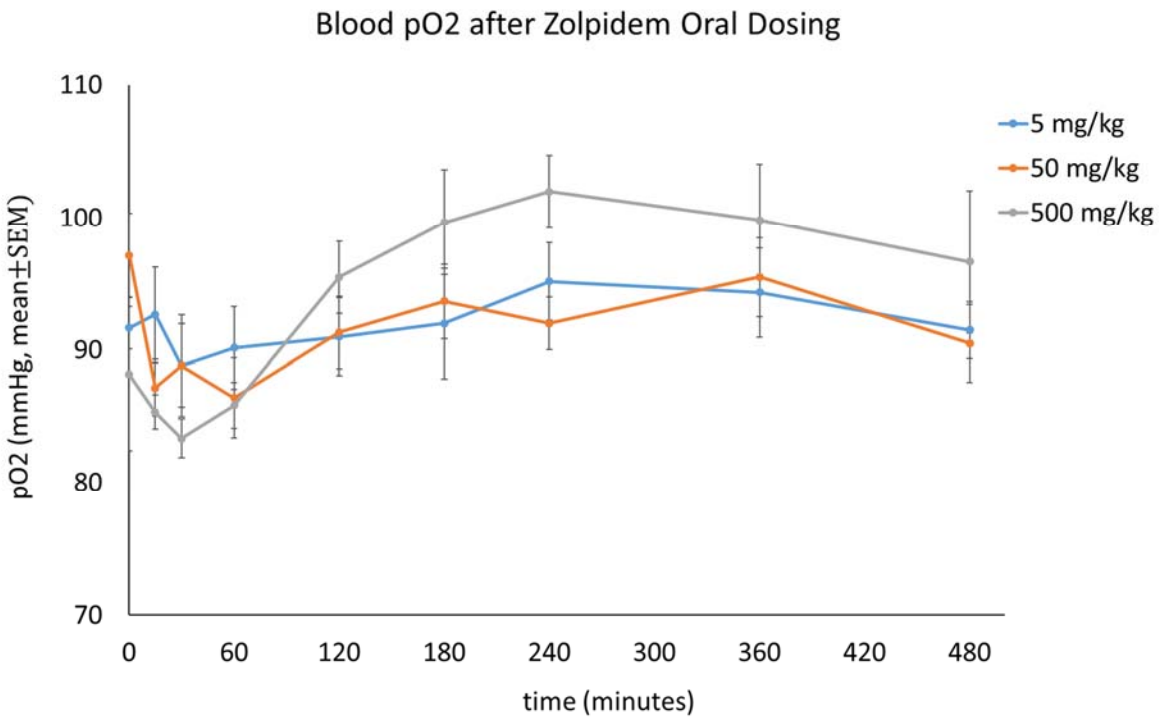



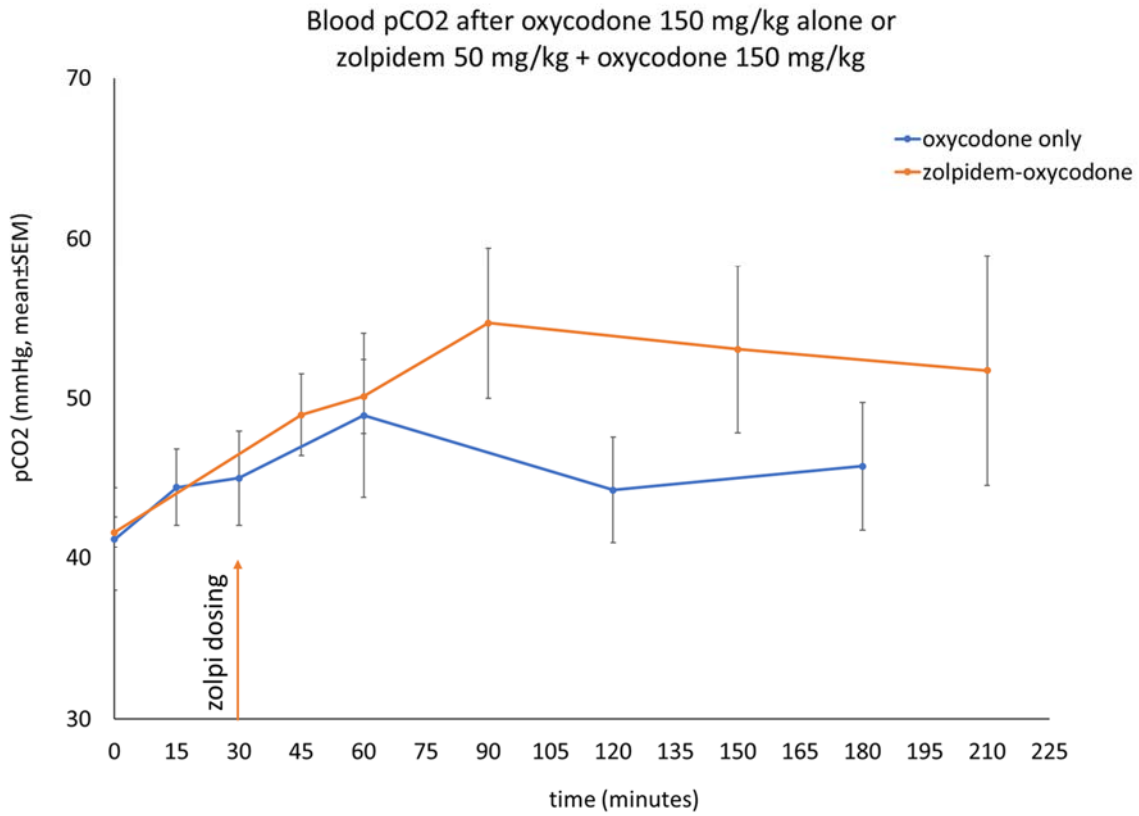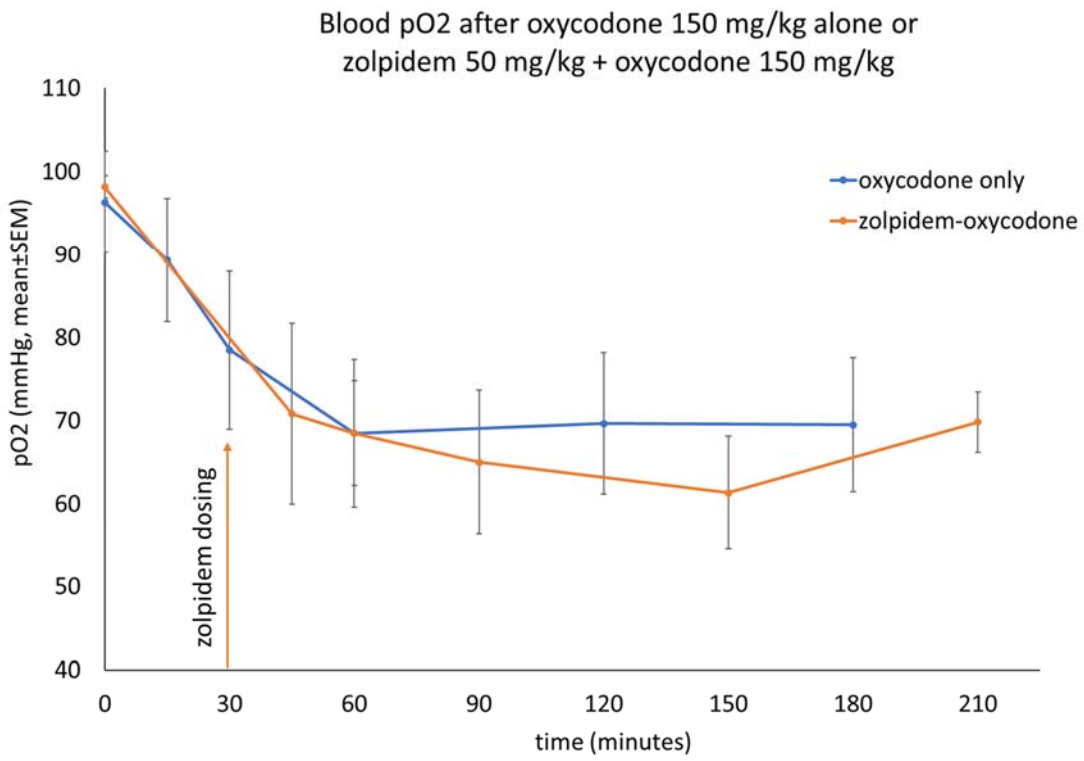

Supplement: CTS-14-2208-s003.pdf [file CTS-14-2208-s003.pdf]
